# Supplementary material for: Enynone-enabled migratory insertion and Schmittel cyclization cascade for the synthesis of furan-fused fluorenes
Source: Royal Society of Chemistry journal article supplement (doi:10.1039/c9qo00045c), 2019-01-01

# Electronic Supplementary Information

## Enynone-enabled migratory insertion and Schmitt cyclization

### cascade for the synthesis of furan-fused fluorenes

He Zhang, Tongxiang Cao, Hejiang Luo, Lianfen Chen, and Shifa Zhu\*

Key Laboratory of Functional Molecular Engineering of Guangdong Province, Guangdong Engineering Research Center for Green Fine Chemicals and Chemical Engineering, School of Chemistry, South China University of Technology, Guangzhou, 510640, P. R. China

*E-mail:* zhusf@scut.edu.cn

## Table of contents

|                                                                                                  |    |
|--------------------------------------------------------------------------------------------------|----|
| 1. Experimental procedures and spectroscopic data .....                                          | 2  |
| 1.1 General information.....                                                                     | 2  |
| 1.2 General procedure for the synthesis of enynones <b>1</b> and dialkynylbenzene <b>2</b> ..... | 2  |
| 1.3 Optimization of the reaction conditions for Synthesis of <b>3aa</b> .....                    | 4  |
| 1.4 General procedure for the synthesis of <b>3am-3bm</b> .....                                  | 4  |
| 1.5 Optimization of the reaction conditions for synthesis of <b>6a</b> .....                     | 12 |
| 1.6 General procedure for the synthesis of <b>6a-6j</b> .....                                    | 13 |
| 1.7 General procedure for the synthesis of <b>8</b> .....                                        | 15 |
| 2. References .....                                                                              | 15 |
| 3. X-Ray diffraction analysis.....                                                               | 16 |
| 3.1 Crystal data and structure refinement for <b>3am</b> .....                                   | 16 |
| 3.2 Crystal data and structure refinement for <b>6d</b> .....                                    | 17 |
| 4. Copies of NMR spectra .....                                                                   | 18 |

## 1. Experimental procedures and spectroscopic data

### 1. 1 General information

All reactions were carried out under an inert atmosphere of dry N<sub>2</sub> in Schlenk tube, solvents were purified by standard method. <sup>1</sup>H, <sup>13</sup>C, <sup>19</sup>F NMR spectra were recorded on a Bruker AVANCE 400 (400 MHz for <sup>1</sup>H; 100 MHz for <sup>13</sup>C; 376 MHz for <sup>19</sup>F), <sup>1</sup>H NMR and <sup>13</sup>C NMR chemical shifts were determined relative to internal standard TMS at  $\delta$  0.0 and <sup>19</sup>F NMR chemical shifts were determined relative to CFCl<sub>3</sub> as external standard. Chemical shifts ( $\delta$ ) are reported in ppm, and coupling constants (*J*) are in Hertz (Hz). The following abbreviations were used to explain the multiplicities: s = singlet, d = doublet, t = triplet, q = quartet, m = multiplet, br = broad. Infrared (IR) spectra are recorded on a Nicolet 210 spectrophotometer and were recorded in potassium bromide (KBr) pellet. Mass spectra (MS) were obtained using EI mass spectrometer. Melting points were determined using a hot stage apparatus. All reagents were used as received from commercial sources, unless specified otherwise, or prepared as described in the literature.

### 1.2 General procedure for the synthesis of enynes **1** and dialkynylbenzene **2**

#### 1.2. 1 General procedure for preparation of enynes **1a–1o**

The typical procedure for the preparation of enynes **1a–1o** was according to literature.<sup>[1]</sup> The characterization data of **1a–1o** was consistent with literature.<sup>[1]</sup>

#### 1.2.2 Typical experimental procedure for the synthesis of dialkynylbenzene **2**<sup>[2]</sup>

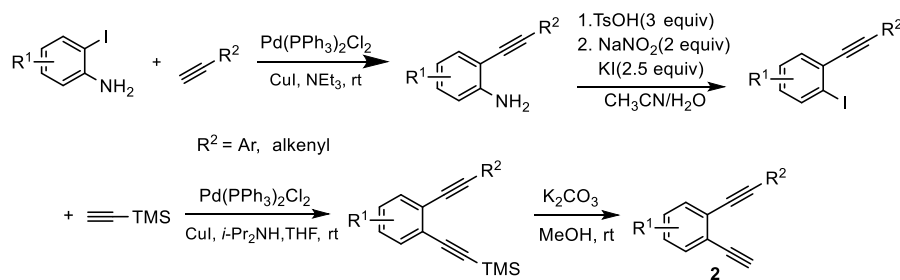

To a solution of the corresponding 2-iodoaniline (1.0 eq.), Pd(PPh<sub>3</sub>)<sub>2</sub>Cl<sub>2</sub> (2.0 mol %), and CuI (1.0 mol %) in NEt<sub>3</sub> (0.25 M) was added the appropriate phenylacetylene (1.2 eq.). The resulting mixture was stirred under nitrogen atmosphere at room temperature overnight. After the reaction finished, the mixture was filtered by short silica, then the solvent was evaporated under reduced pressure and the residue was purified by flash chromatography on silica gel to afford the 2-phenylaniline in 80-90% yield.

To a solution of *p*-TsOH H<sub>2</sub>O (3.0 eq.) in MeCN (0.25 M) was added phenylaniline (1.0 eq.). The resulting suspension of ammonium salt was cooled to 0 °C and was added gradually a solution of NaNO<sub>2</sub> (2.0 eq.) and KI (2.5 eq.) in water (5 M). The reaction mixture was stirred for 10 min at 0 °C. Saturated NaHCO<sub>3</sub> solution and Na<sub>2</sub>S<sub>2</sub>O<sub>3</sub> solution was added to the reaction mixture successively. The reaction suspension was extracted with diethyl ether and purified on a silica-gel column chromatography (petroleum ether) to provide 1-iodo-2-(phenylethynyl)benzene in 71-76%.

To a solution of the corresponding 2-iodoaniline (1.0 eq.), Pd(PPh<sub>3</sub>)<sub>2</sub>Cl<sub>2</sub> (2.0 mol %), i-Pr<sub>2</sub>NH (0.1 eq.) and CuI (1.0 mol %) in THF (0.25 M) was added the appropriate trimethylsilylacetylene (1.2 eq.). The resulting mixture was stirred under nitrogen atmosphere at room temperature overnight. After the reaction finished, the mixture was filtered by short silica, then the solvent was evaporated under reduced pressure and the residue was purified by flash chromatography on silica gel to afford the trimethyl((2-(phenylethynyl)phenyl)ethynyl)silane in 78-92% yield.

To a solution of trimethyl((2-(phenylethynyl)phenyl)ethynyl)silane (1.0 eq.) in MeOH was added K<sub>2</sub>CO<sub>3</sub> (2.0 eq.). The reaction mixture was stirred for 10 min at room temperature. The mixture was diluted with DCM, and the organic layer was washed with saturated NaCl solution, dried and concentrated to afford the desired product **2** in 90-96% yield.

The characterization data of **2a–2h** and **2j** was consistent with literature. [3,4,5]

#### 1-Ethynyl-2-(m-tolyethynyl)benzene (2i)

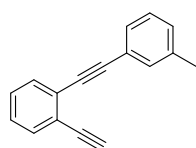

Colorless oil, <sup>1</sup>H NMR (400 MHz, CDCl<sub>3</sub>) δ 7.52 (d, *J* = 7.6 Hz, 2H), 7.37 (d, *J* = 8.2 Hz, 2H), 7.29 (d, *J* = 7.5 Hz, 1H), 7.26 – 7.19 (m, 2H), 7.14 (d, *J* = 7.6 Hz, 1H), 3.36 (s, 1H), 2.34 (s, 3H). <sup>13</sup>C NMR (100 MHz, CDCl<sub>3</sub>) δ 138.1, 132.6, 132.4, 131.8, 129.5, 128.9, 128.6, 128.3, 127.9, 126.5, 124.7, 123.0, 93.8, 87.6, 82.3, 81.2, 21.3. IR (KBr, cm<sup>-1</sup>) 3448, 3293, 2921, 2207, 1641, 1483, 1441, 1250, 1087, 843, 755, 685, 624. HRMS (ESI) Calcd for C<sub>17</sub>H<sub>12</sub> (M+Na)<sup>+</sup> 239.0831, found 239.0827.

#### 4-((2-Ethynylphenyl)ethynyl)-1,1'-biphenyl (2k)

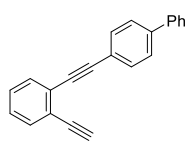

White solid, m. p. = 61-62 °C <sup>1</sup>H NMR (400 MHz, CDCl<sub>3</sub>) δ 7.64 (ddd, *J* = 15.8, 11.9, 7.8 Hz, 8H), 7.49 (t, *J* = 7.5 Hz, 2H), 7.43 – 7.32 (m, 3H), 3.43 (s, 1H). <sup>13</sup>C NMR (100 MHz, CDCl<sub>3</sub>) δ 141.3, 140.4, 132.7, 132.3, 131.8, 128.9, 128.6, 128.0, 127.7, 127.1, 126.4, 124.7, 122.1, 93.6, 88.6, 82.3, 81.2. IR (KBr, cm<sup>-1</sup>) 3289, 3062, 2216, 1917, 1593, 1484, 1442, 1398, 1265, 1101, 1006, 954, 839, 760, 694, 657, 559. HRMS (ESI) Calcd for C<sub>20</sub>H<sub>12</sub> (M+H)<sup>+</sup> 253.1012, found 253.1019.

#### 4-Bromo-1-ethynyl-2-(phenylethynyl)benzene (2l)

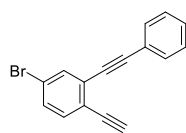

White solid, m. p. = 46-47 °C <sup>1</sup>H NMR (400 MHz, CDCl<sub>3</sub>) δ 7.73 (s, 1H), 7.61 (s, 2H), 7.44 – 7.37 (m, 5H), 3.45 (s, 1H). <sup>13</sup>C NMR (100 MHz, CDCl<sub>3</sub>) δ 134.5, 133.7, 131.9, 131.2, 128.9, 128.5, 128.1, 123.6, 122.7, 122.5, 94.9, 86.6, 82.3, 81.4. IR (KBr, cm<sup>-1</sup>) 3745, 3521, 3496, 3464, 3442, 2959, 1539, 1491, 1071, 1023, 819, 754, 687. HRMS (ESI) Calcd for C<sub>16</sub>H<sub>9</sub>Br (M-H)<sup>-</sup> 278.9815, found 278.9820.

#### 1-Ethynyl-4-methyl-2-(phenylethynyl)benzene (2m)

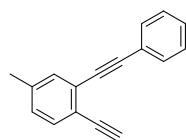

White solid, m. p. = 56-57 °C <sup>1</sup>H NMR (400 MHz, CDCl<sub>3</sub>) δ <sup>1</sup>H NMR (400 MHz, CDCl<sub>3</sub>) δ 7.67 (d, *J* = 3.3 Hz, 2H), 7.51 (d, *J* = 7.9 Hz, 1H), 7.42 (d, *J* = 7.9 Hz, 4H), 7.14 (d, *J* = 7.8 Hz, 1H), 3.43 (s, 1H), 2.39 (s, 3H). <sup>13</sup>C NMR (100 MHz, CDCl<sub>3</sub>) δ 138.9, 132.6, 132.4, 131.9, 129.1, 128.6, 128.5, 126.2, 123.4, 121.8, 93.3, 88.3, 82.5, 80.6, 21.3. IR (KBr, cm<sup>-1</sup>) 3817, 3744, 3520, 3497, 3442, 3287, 3028, 2921, 2213, 2105, 1911, 1599, 1492, 1443, 1376, 1237, 1098, 1068, 1027, 915, 888, 821, 755, 689, 652, 619, 583, 544, 515. HRMS (ESI) Calcd for C<sub>17</sub>H<sub>12</sub> (M+Na)<sup>+</sup> 239.0831, found 239.0834.

#### (E)-1-Ethynyl-2-(4-phenylbut-3-en-1-yn-1-yl)benzene (2n)

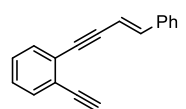

E/Z = 10:1, yellow oil, <sup>1</sup>H NMR (400 MHz, CDCl<sub>3</sub>) δ Isomer E δ 7.41 (dd, *J* = 13.2, 7.5 Hz, 2H), 7.33 (d, *J* = 7.4 Hz, 2H), 7.28 – 7.15 (m, 5H), 7.00 (d, *J* = 16.2 Hz, 1H), 6.35 (d, *J* = 16.2 Hz, 1H), 3.27 (s, 1H). Isomer Z δ 7.93 (d, *J* = 7.5 Hz, 2H), 6.62 (d, *J* = 12.0 Hz, 1H), 5.89 (d, *J* = 12.0 Hz, 1H), 3.22 (s, 1H) ppm (remaining peaks

could not be assigned)  $^{13}\text{C}$  NMR (100 MHz,  $\text{CDCl}_3$ ) Isomer E  $\delta$  142.0, 136.3, 132.7, 131.9, 128.8, 128.6, 127.9, 126.5, 126.4, 124.4, 108.1, 107.2, 93.2, 90.2, 82.3, 81.2. Isomer Z  $\delta$  139.2, 132.9, 132.2, 129.1, 128.6, 128.3 ppm (the remaining signals could not be assigned) IR (KBr,  $\text{cm}^{-1}$ ) 3703, 3521, 3498, 2922, 1475, 1266, 953, 750, 519. HRMS (ESI) Calcd for  $\text{C}_{18}\text{H}_{12}$  ( $\text{M}+\text{H}$ ) $^+$  229.1012, found 229.1020.

### 1.3 Optimization of the reaction conditions for Synthesis of **3aa**

Table S1 Optimization of the Reaction Conditions for Synthesis of **3aa**<sup>a</sup>

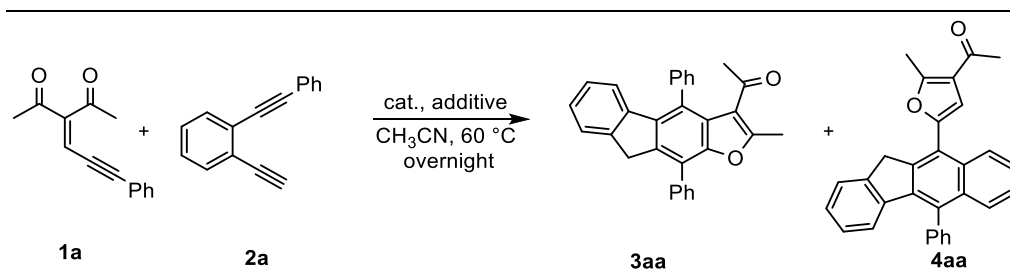

| Entry    | Cat.                                  | Base                                              | <b>3aa/4aa</b> <sup>b</sup> | <b>3aa</b> <sup>c</sup> (%) |
|----------|---------------------------------------|---------------------------------------------------|-----------------------------|-----------------------------|
| 1        | CuI                                   | -                                                 | 6:1                         | 58                          |
| 2        | CuBr                                  | -                                                 | -                           | trace                       |
| 3        | CuCl                                  | -                                                 | -                           | trace                       |
| 4        | $\text{Cu}(\text{MeCN})_4\text{PF}_4$ | -                                                 | 6:1                         | 34                          |
| 5        | CuI                                   | $\text{K}_2\text{CO}_3$                           | 4:1                         | 30                          |
| 6        | CuI                                   | $\text{NaHCO}_3$                                  | 5:1                         | 45                          |
| 7        | CuI                                   | <i>i</i> - $\text{Pr}_2\text{NEt}$                | 8:1                         | 69                          |
| <b>8</b> | <b>CuI</b>                            | <b><i>i</i>-<math>\text{Pr}_2\text{NH}</math></b> | <b>8:1</b>                  | <b>75<sup>d</sup></b>       |

<sup>a</sup>The reaction was performed at 60 °C overnight. The molar ratio of **1a:2a** = 1:1. [**1a**] = 0.1 mmol, Cu(I) = 10 mol %, base (1.0 eq.) in MeCN (1 mL); <sup>b</sup>Isomeric ratio of **3aa** and **4aa** determined by  $^1\text{H}$  NMR spectroscopy. <sup>c</sup>Yield of **3aa** determined by  $^1\text{H}$  NMR spectroscopy. <sup>d</sup>Isolated yield of **3aa**.

### 1.4 General procedure for the synthesis of **3am-3bm**

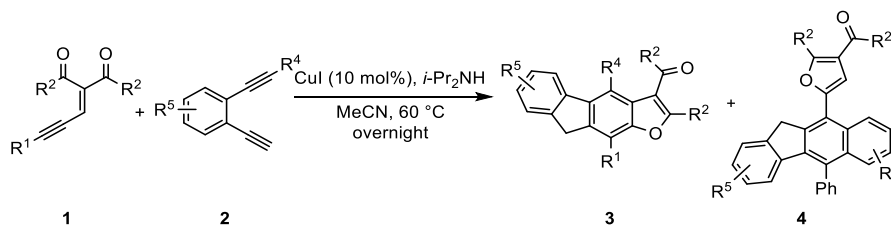

To an acetonitrile (MeCN, 1.0 mL) suspension of CuI (10 mol %) in Schlenk tube with a magnetic bar under nitrogen atmosphere, was added alkynyl (**2**, 0.1 mmol), *i*- $\text{Pr}_2\text{NH}$  (1 eq.) and enynes (**1**, 0.1 mmol). The reaction mixture was then heated to a temperature of 60 °C and stirred. The reaction was monitored by TLC. The reaction mixture was purified by chromatography with petroleum/ethyl acetate, 20/1, and recrystallization to afford **3**. **4aa** was confirmed after further reduction with  $\text{NaBH}_4$  to afford **7aa**.

### 1-(2-Methyl-4,10-diphenyl-9H-fluoreno[2,3-*b*]furan-3-yl)ethan-1-one (3aa)

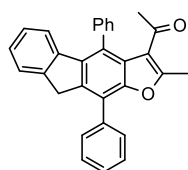

White solid, m. p. = 177-178 °C, yield: 75%.  $^1\text{H NMR}$  (400 MHz,  $\text{CDCl}_3$ )  $\delta$  7.70 (d,  $J = 7.7$  Hz, 2H), 7.63 – 7.50 (m, 8H), 7.47 (d,  $J = 7.4$  Hz, 1H), 7.20 (t,  $J = 7.4$  Hz, 1H), 7.05 (t,  $J = 7.6$  Hz, 1H), 6.83 (d,  $J = 7.9$  Hz, 1H), 4.01 (s, 2H), 2.46 (s, 3H), 1.59 (s, 3H).  $^{13}\text{C NMR}$  (100 MHz,  $\text{CDCl}_3$ )  $\delta$  199.2, 157.1, 150.5, 143.9, 141.5, 139.5, 139.2, 135.3, 135.0, 130.1, 129.6, 129.3, 128.6, 128.6, 128.4, 128.0, 126.3, 126.1, 125.5, 124.6, 122.8, 122.2, 121.1, 36.3, 30.7, 13.5. **IR** (KBr,  $\text{cm}^{-1}$ ) 3689, 3057, 2922, 1957, 1893, 1681, 1587, 1446, 1384, 1332, 1273, 1218, 1161, 1118, 1028, 941, 625, 496. **HRMS** (ESI) Calcd for  $\text{C}_{30}\text{H}_{22}\text{O}_2$  ( $\text{M}+\text{H}$ ) $^+$  415.1693, found 415.1694.

### 1-(2-Methyl-5-(5-phenyl-11H-benzo[*b*]fluoren-10-yl)furan-3-yl)ethan-1-ol (7aa)

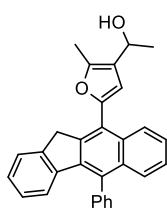

White solid, m. p. = 178-179 °C, yield: 7%.  $^1\text{H NMR}$  (400 MHz,  $\text{CDCl}_3$ )  $\delta$  8.23 (d,  $J = 8.4$  Hz, 1H), 7.59 (t,  $J = 9.3$  Hz, 4H), 7.50 – 7.36 (m, 5H), 7.21 (d,  $J = 7.4$  Hz, 1H), 7.01 (t,  $J = 7.4$  Hz, 1H), 6.72 (s, 1H), 6.44 (d,  $J = 7.8$  Hz, 1H), 5.01 (d,  $J = 6.2$  Hz, 1H), 4.18 (s, 2H), 2.48 (s, 3H), 1.75 (s, 1H), 1.61 (d,  $J = 6.2$  Hz, 3H).  $^{13}\text{C NMR}$  (100 MHz,  $\text{CDCl}_3$ )  $\delta$  149.2, 147.6, 144.2, 141.1, 140.9, 139.0, 137.3, 134.1, 133.2, 130.8, 130.1, 129.2, 127.9, 127.2, 126.7, 126.5, 125.7, 125.6, 125.3, 125.0, 124.7, 124.4, 123.7, 109.7, 63.0, 37.3, 24.2, 12.2. **IR** (KBr,  $\text{cm}^{-1}$ ) 3744, 3521, 3497, 2922, 1540, 761, 700. **HRMS** (ESI) Calcd for  $\text{C}_{30}\text{H}_{24}\text{O}_2$  ( $\text{M}+\text{Na}$ ) $^+$  439.1669, found. 439.1667.

### 1-(10-(4-Ethylphenyl)-2-methyl-4-phenyl-9H-fluoreno[2,3-*b*]furan-3-yl)ethan-1-one (3ab)

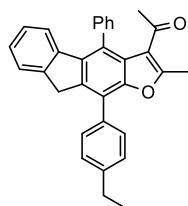

White solid, m. p. = 166-167 °C, yield: 70%.  $^1\text{H NMR}$  (400 MHz,  $\text{CDCl}_3$ )  $\delta$  7.60 (dd,  $J = 20.5, 7.9$  Hz, 7H), 7.45 (dd,  $J = 12.3, 7.7$  Hz, 3H), 7.20 (t,  $J = 7.4$  Hz, 1H), 7.04 (t,  $J = 7.6$  Hz, 1H), 6.83 (d,  $J = 7.9$  Hz, 1H), 4.02 (s, 2H), 2.82 (q,  $J = 7.6$  Hz, 2H), 2.46 (s, 3H), 1.58 (s, 3H), 1.39 (t,  $J = 7.6$  Hz, 3H).  $^{13}\text{C NMR}$  (100 MHz,  $\text{CDCl}_3$ )  $\delta$  199.3, 157.1, 150.6, 145.1, 144.0, 143.9, 141.6, 139.6, 139.3, 135.3, 132.2, 130.2, 129.6, 129.3, 128.4, 128.2, 126.3, 126.1, 125.5, 124.6, 122.8, 122.2, 121.1, 36.4, 30.7, 28.8, 15.4, 13.5. **IR** (KBr,  $\text{cm}^{-1}$ ) 3711, 3060, 2962, 2314, 1685, 1579, 1452, 1333, 1271, 1192, 1110, 1023, 940, 803, 756, 610, 518. **HRMS** (ESI) Calcd for  $\text{C}_{32}\text{H}_{26}\text{O}_2$  ( $\text{M}+\text{H}$ ) $^+$  443.2006, found 443.2004.

### 1-(10-(4-(Tert-Butyl)phenyl)-2-methyl-4-phenyl-9H-fluoreno[2,3-*b*]furan-3-yl)ethan-1-one (3ac)

White solid, m. p. = 222-223 °C, yield: 65%.  $^1\text{H NMR}$  (400 MHz,  $\text{CDCl}_3$ )  $\delta$  Isomer **3ac**  $\delta$  7.67 – 7.47

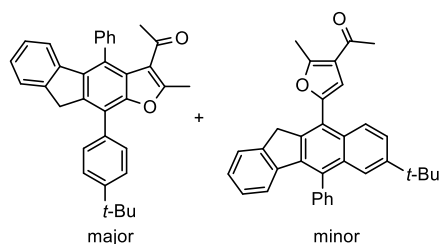

(m, 9H), 7.43 (d,  $J = 7.2$  Hz, 1H), 7.16 (t,  $J = 7.4$  Hz, 1H), 7.00 (t,  $J = 7.5$  Hz, 1H), 6.78 (d,  $J = 7.9$  Hz, 1H), 4.00 (s, 2H), 2.43 (s, 3H), 1.54 (s, 3H), 1.43 (s, 9H). Isomer **4ac**  $\delta$  8.08 (d,  $J = 8.9$  Hz, 1H), 6.93 (s, 1H), 6.46 (d,  $J = 7.9$  Hz, 1H), 4.14 (s, 2H), 2.78 (s, 3H), 2.55 (s, 3H), 1.27 (s, 9H) ppm (remaining peaks could not be assigned)  $^{13}\text{C NMR}$  (100 MHz,  $\text{CDCl}_3$ ) mixtures **3ac** and **4ac**  $\delta$  199.3, 194.2, 158.2, 157.0, 150.8, 150.6, 149.5, 148.1, 144.0, 141.6, 141.2, 139.59, 139.30, 138.95, 135.31, 134.91, 131.93, 130.17, 129.98, 129.27, 129.13, 128.37, 127.90, 127.2, 126.58, 126.28, 126.1, 125.6, 125.5, 124.9, 124.8, 124.6, 123.7, 122.9, 122.8, 122.1, 122.0, 121.1, 111.0, 36.5, 34.9, 34.8, 31.5, 31.1, 30.7, 29.7, 29.3, 14.7, 13.5. **IR** (KBr,  $\text{cm}^{-1}$ ) 3703, 3057, 2958, 1680, 1580, 1455, 1270, 1227, 1122, 1024, 945, 811, 732, 616, 556. **HRMS** (ESI) Calcd for  $\text{C}_{34}\text{H}_{30}\text{O}_2$  ( $\text{M}+\text{Na}$ ) $^+$  493.2138, found 493.2135.

### 1-(10-(4-Fluorophenyl)-2-methyl-4-phenyl-9H-fluoreno[2,3-b]furan-3-yl)ethan-1-one (3ad)

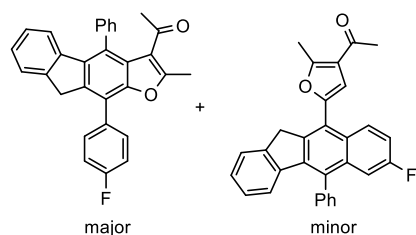

White solid, m. p. = 172-174 °C, yield: 82%. <sup>1</sup>H NMR (400 MHz, CDCl<sub>3</sub>) Isomer **3ad** δ 7.66 (dd, *J* = 8.4, 5.5 Hz, 2H), 7.56 (d, *J* = 7.0 Hz, 5H), 7.47 (d, *J* = 7.4 Hz, 1H), 7.29 (s, 2H), 7.20 (t, *J* = 7.4 Hz, 1H), 7.05 (t, *J* = 7.6 Hz, 1H), 6.82 (d, *J* = 7.9 Hz, 1H), 3.97 (s, 2H), 2.46 (s, 3H), 1.58 (s, 3H). Isomer **4ad** δ 8.15 – 8.08 (m, 1H), 6.94 (s, 1H), 6.46 (d, *J* = 8.0 Hz, 1H), 4.13 (s, 2H), 2.78 (s, 3H), 2.55 (s, 3H) ppm (remaining peaks could not be assigned) <sup>13</sup>C NMR (101 MHz, CDCl<sub>3</sub>) mixtures **3ad** and **4ad** δ 199.1, 194.1, 161.3, 158.5, 157.0, 150.5, 148.9, 143.7, 141.4, 140.6, 139.5, 139.1, 138.4, 138.3, 135.4, 131.4, 131.3, 130.1, 129.9, 129.4, 129.3, 128.7, 128.5, 128.3, 127.7, 126.7, 126.4, 126.2, 125.6, 124.7, 123.9, 122.8, 121.2, 115.8, 115.6, 111.3, 37.0, 36.2, 30.7, 29.7, 14.7, 13.4. <sup>19</sup>F NMR (376 MHz, CDCl<sub>3</sub>) Isomer **3ad** δ -113.8 Isomer **4ad** δ -114.7 IR (KBr, cm<sup>-1</sup>) 3711, 3062, 2922, 2855, 1680, 1510, 1453, 1226, 1157, 1110, 1022, 948, 808, 757, 613. HRMS (ESI) Calcd for C<sub>30</sub>H<sub>21</sub>FO<sub>2</sub> (M+H)<sup>+</sup> 433.1598, found 443.1597.

### 1-(10-(4-Chlorophenyl)-2-methyl-4-phenyl-9H-fluoreno[2,3-b]furan-3-yl)ethan-1-one (3ae)

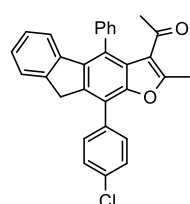

White solid, m. p. = 217-218 °C, yield: 62%. <sup>1</sup>H NMR (400 MHz, CDCl<sub>3</sub>) δ 7.53 (d, *J* = 8.3 Hz, 2H), 7.46 (dd, *J* = 8.9, 3.2 Hz, 7H), 7.36 (d, *J* = 7.4 Hz, 1H), 7.10 (t, *J* = 7.4 Hz, 1H), 6.94 (t, *J* = 7.6 Hz, 1H), 6.71 (d, *J* = 7.9 Hz, 1H), 3.87 (s, 2H), 2.35 (s, 3H), 1.47 (s, 3H). <sup>13</sup>C NMR (100 MHz, CDCl<sub>3</sub>) δ 199.1, 157.1, 150.3, 143.7, 141.4, 139.4, 139.0, 135.4, 134.0, 133.4, 131.0, 130.1, 129.3, 128.9, 128.9, 128.5, 126.4, 126.2, 125.6, 124.7, 122.8, 121.2, 120.9, 36.2, 30.7, 13.4. IR (KBr, cm<sup>-1</sup>) 3710, 3060, 2925, 1582, 1487, 1267, 1225, 1154, 1112, 1021, 934, 790, 754, 701, 480. HRMS (ESI) Calcd for C<sub>30</sub>H<sub>21</sub>ClO<sub>2</sub> (M+H)<sup>+</sup> 449.1303, found 449.1302.

### 1-(10-(4-Bromophenyl)-2-methyl-4-phenyl-9H-fluoreno[2,3-b]furan-3-yl)ethan-1-one (3af)

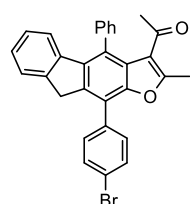

White solid, m. p. = 135-136 °C, yield: 65%. <sup>1</sup>H NMR (400 MHz, CDCl<sub>3</sub>) δ 7.66 (d, *J* = 7.6 Hz, 2H), 7.58 – 7.51 (m, 7H), 7.48 (d, *J* = 7.5 Hz, 1H), 7.42 (d, *J* = 7.4 Hz, 1H), 7.15 (t, *J* = 7.3 Hz, 1H), 7.00 (t, *J* = 7.6 Hz, 1H), 6.79 (d, *J* = 7.9 Hz, 1H), 3.96 (s, 2H), 2.42 (s, 3H), 1.55 (s, 3H). <sup>13</sup>C NMR (100 MHz, CDCl<sub>3</sub>) δ 199.2, 157.1, 150.5, 143.9, 141.5, 139.6, 139.2, 135.3, 135.0, 130.2, 129.7, 129.3, 128.7, 128.6, 128.4, 128.0, 126.4, 126.1, 125.5, 124.7, 122.8, 122.2, 121.2, 36.3, 30.7, 13.5. IR (KBr, cm<sup>-1</sup>) 3711, 3058, 2922, 1679, 1582, 1445, 1385, 1335, 1272, 1224, 1159, 1116, 1025, 944, 802, 760, 704, 625, 497. HRMS (ESI) Calcd for C<sub>30</sub>H<sub>21</sub>BrO<sub>2</sub> (M+Na)<sup>+</sup> 515.0617, found 515.0616.

### 1-(2-Methyl-4-phenyl-10-(4-(trifluoromethyl)phenyl)-9H-fluoreno[2,3-b]furan-3-yl)ethan-1-one (3ag)

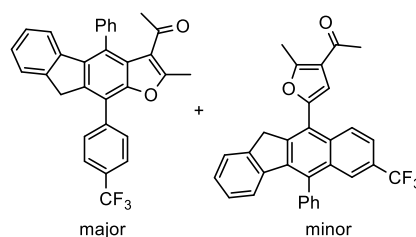

White solid, m. p. = 187-189 °C, yield: 66%. <sup>1</sup>H NMR (400 MHz, CDCl<sub>3</sub>) Isomer **3ag** δ 7.80 (dd, *J* = 17.1, 8.1 Hz, 4H), 7.52 (dd, *J* = 17.4, 6.6 Hz, 5H), 7.42 (d, *J* = 7.5 Hz, 1H), 7.17 (t, *J* = 7.4 Hz, 1H), 7.01 (t, *J* = 7.6 Hz, 1H), 6.79 (d, *J* = 7.9 Hz, 1H), 3.94 (s, 2H), 2.42 (s, 3H), 1.56 (s, 3H). Isomer **4ag** δ 8.25 (d, *J* = 8.9 Hz, 1H), 7.89 (s, 1H), 7.63 (d, *J* = 4.5 Hz, 1H), 6.96 (s, 1H), 6.45 (d, *J* = 7.9 Hz, 1H), 4.17 (s, 1H), 2.79 (s, 1H), 2.56 (s, 1H) ppm (remaining peaks could not be assigned) <sup>13</sup>C NMR (100 MHz, CDCl<sub>3</sub>)

Isomer **3ag**  $\delta$  199.0, 157.1, 150.2, 143.6, 141.3, 139.4, 138.9, 135.6, 130.0, 130.0, 129.8, 129.5, 129.3, 128.6, 126.5, 126.3, 125.7, 125.7, 125.6, 124.7, 122.8, 121.2, 120.7, 36.2, 30.7, 13.4. Isomer **4ag**  $\delta$  194.0, 138.8, 29.73 ppm (the remaining signals could not be assigned)  $^{19}\text{F}$  NMR (376 MHz,  $\text{CDCl}_3$ ) Isomer **3ag**  $\delta$  -62.5. IR (KBr,  $\text{cm}^{-1}$ ) 3624, 3061, 2923, 2855, 1679, 1580, 1448, 1398, 1322, 1275, 1228, 1166, 1122, 1068, 1022, 946, 845, 758, 618. HRMS (ESI) Calcd for  $\text{C}_{31}\text{H}_{21}\text{F}_3\text{O}_2$  ( $\text{M}+\text{H}$ ) $^+$  483.1566, found 483.1566.

#### 1-(10-(4-Methoxyphenyl)-2-methyl-4-phenyl-9H-fluoreno[2,3-*b*]furan-3-yl)ethan-1-one (**3ah**)

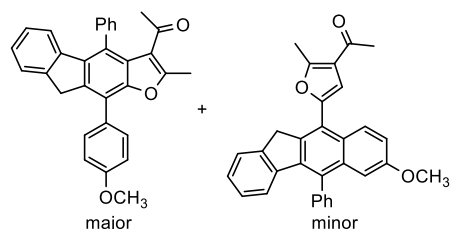

Colorless oil, yield: 46%.  $^1\text{H}$  NMR (400 MHz,  $\text{CDCl}_3$ ) Isomer **3ah**  $\delta$  7.60 (dd,  $J = 7.1, 3.9$  Hz, 3H), 7.52 (d,  $J = 2.8$  Hz, 4H), 7.42 (d,  $J = 7.2$  Hz, 1H), 7.16 (dd,  $J = 8.5, 5.2$  Hz, 1H), 7.10 (d,  $J = 8.5$  Hz, 2H), 7.00 (dd,  $J = 11.7, 7.3$  Hz, 1H), 6.79 (d,  $J = 7.9$  Hz, 1H), 3.96 (s, 2H), 3.90 (s, 3H), 2.43 (s, 3H), 1.54 (s, 3H). Isomer **4ah**  $\delta$  8.05 (d,  $J =$

9.2 Hz, 1H), 6.92 (s, 1H), 6.88 (s, 1H), 6.45 (d,  $J = 7.9$  Hz, 1H), 4.11 (s, 1H), 3.69 (s, 3H), 2.78 (s, 2H), 2.56 (s, 2H) ppm (remaining peaks could not be assigned)  $^{13}\text{C}$  NMR (100 MHz,  $\text{CDCl}_3$ ) mixtures **3ah** and **4ah**  $\delta$  199.3, 194.2, 159.3, 158.3, 157.3, 157.0, 150.6, 149.3, 144.1, 143.9, 141.6, 141.1, 139.5, 139.3, 139.3, 139.0, 137.9, 135.3, 134.6, 133.7, 130.8, 130.1, 129.9, 129.5, 129.3, 129.3, 128.4, 128.2, 128.0, 127.3, 127.1, 126.7, 126.6, 126.3, 126.1, 125.5, 124.8, 124.6, 123.7, 123.1, 122.9, 122.8, 121.9, 121.1, 118.0, 114.1, 111.0, 105.7, 55.4, 55.1, 36.9, 36.4, 30.7, 29.7, 29.4, 14.7, 13.5. IR (KBr,  $\text{cm}^{-1}$ ) 3057, 2922, 2846, 1676, 1611, 1508, 1455, 1349, 1283, 1235, 1177, 1121, 1032, 949, 832, 732, 620, 514. HRMS (ESI) Calcd for  $\text{C}_{31}\text{H}_{24}\text{O}_3$  ( $\text{M}+\text{H}$ ) $^+$  445.1798, found 445.1797.

#### 1-(2-Methyl-4-phenyl-10-(*m*-tolyl)-9H-fluoreno[2,3-*b*]furan-3-yl)ethan-1-one (**3ai**)

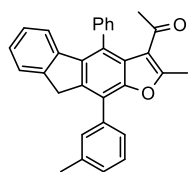

White solid, m. p. = 131-132  $^{\circ}\text{C}$ , yield: 65%.  $^1\text{H}$  NMR (400 MHz,  $\text{CDCl}_3$ )  $\delta$  7.58 – 7.49 (m, 5H), 7.44 (t,  $J = 7.4$  Hz, 4H), 7.29 (d,  $J = 4.0$  Hz, 1H), 7.16 (t,  $J = 7.4$  Hz, 1H), 7.01 (t,  $J = 7.6$  Hz, 1H), 6.79 (d,  $J = 7.9$  Hz, 1H), 3.96 (s, 2H), 2.48 (s, 3H), 2.42 (s, 3H), 1.55 (s, 3H).  $^{13}\text{C}$  NMR (100 MHz,  $\text{CDCl}_3$ )  $\delta$  199.2, 157.1, 150.6, 144.0, 141.6, 139.6, 139.3, 138.3, 135.3, 135.0, 130.3, 130.2, 129.3, 128.8, 128.6,

128.5, 128.4, 126.8, 126.4, 126.1, 125.5, 124.7, 122.8, 122.4, 121.2, 36.3, 30.7, 21.7, 13.5. IR (KBr,  $\text{cm}^{-1}$ ) 3690, 3052, 2921, 1680, 1587, 1447, 1382, 1336, 1276, 1233, 1161, 1115, 1031, 948, 903, 628. HRMS (ESI) Calcd for  $\text{C}_{31}\text{H}_{24}\text{O}_2$  ( $\text{M}+\text{Na}$ ) $^+$  451.1669, found 451.1670.

#### 1-(2-Ethyl-4,10-diphenyl-9H-fluoreno[2,3-*b*]furan-3-yl)propan-1-one (**3aj**)

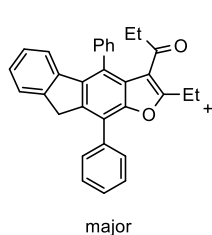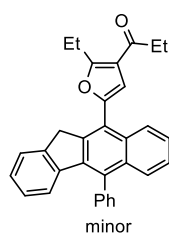

Colorless oil, yield: 84%.  $^1\text{H}$  NMR (400 MHz,  $\text{CDCl}_3$ ) Isomer **3aj**  $\delta$  7.56 (d,  $J = 7.3$  Hz, 2H), 7.50 – 7.31 (m, 8H), 7.28 (d,  $J = 7.2$  Hz, 1H), 7.01 (t,  $J = 7.3$  Hz, 1H), 6.86 (dd,  $J = 14.9, 7.4$  Hz, 1H), 6.63 (d,  $J = 7.9$  Hz, 1H), 3.84 (s, 2H), 2.60 (q,  $J = 7.5$  Hz, 2H), 1.78 (q,  $J = 7.2$  Hz, 2H), 1.16 – 1.07 (m, 3H), 0.55 (t,  $J = 7.2$  Hz, 3H). Isomer **4aj**  $\delta$  8.05 (d,  $J = 8.4$  Hz, 1H), 7.08 (s, 2H),

6.34 (d,  $J = 7.9$  Hz, 1H), 4.03 (s, 2H), 3.11 (q,  $J = 7.5$  Hz, 2H), 2.78 (q,  $J = 7.2$  Hz, 2H), 1.28 (dd,  $J = 15.5, 8.0$  Hz, 3H) ppm (remaining peaks could not be assigned)  $^{13}\text{C}$  NMR (100 MHz,  $\text{CDCl}_3$ ) mixtures **3aj** and **4aj**  $\delta$  203.2, 197.2, 163.1, 160.2, 150.5, 149.2, 143.9, 141.6, 141.0, 139.4, 138.8, 135.2, 135.2, 134.8, 133.3, 130.9, 130.0, 129.7, 129.3, 128.6, 128.6, 128.4, 128.0, 127.9, 127.4, 126.9, 126.7, 126.3, 126.1, 125.8, 125.6, 125.2, 124.8, 124.7, 123.8, 122.7, 122.2, 121.4, 119.5, 110.8, 37.8, 37.1, 36.4, 34.7, 29.8, 22.0, 20.9, 13.0, 12.3, 8.3, 8.1. IR (KBr,  $\text{cm}^{-1}$ ) 3692, 3058, 2976, 2932, 1955, 1685, 1588, 1452,

1379, 1329, 1245, 1116, 1019, 919, 758, 706, 601, 496. **HRMS** (ESI) Calcd for  $C_{32}H_{26}O_2$  (M+H)<sup>+</sup> 443.2006, found 443.2008.

**Phenyl(2,4,10-triphenyl-9H-fluoreno[2,3-*b*]furan-3-yl)methanone (3ak)**

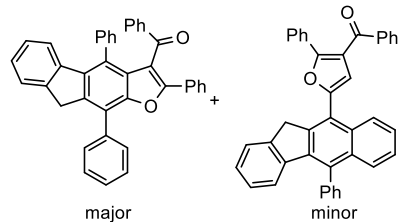

White solid, m. p. = 150-151 °C, yield: 63%. <sup>1</sup>H NMR (400 MHz, CDCl<sub>3</sub>) Isomer **3ak** δ 7.69 (d, *J* = 7.8 Hz, 2H), 7.52 – 7.44 (m, 5H), 7.44 – 7.34 (m, 4H), 7.34 – 7.27 (m, 2H), 7.21-7.16 (m, 1H), 7.13 – 7.05 (m, 5H), 6.93 (m, 4H), 6.78 (t, *J* = 7.6 Hz, 1H), 3.90 (s, 2H). Isomer **4ak** δ 8.20 (d, *J* = 8.3 Hz, 1H), 7.89 (d, *J* = 7.5 Hz, 1H), 7.74 (d, *J* = 7.2 Hz, 1H), 6.35 (d,

*J* = 7.7 Hz, 3H), 4.14 (s, 2H) ppm (remaining peaks could not be assigned) <sup>13</sup>C NMR (100 MHz, CDCl<sub>3</sub>) mixtures **3ak** and **4ak** δ 193.9, 191.9, 155.6, 153.0, 150.6, 150.3, 143.9, 143.7, 141.8, 141.4, 141.0, 140.2, 138.9, 138.2, 137.6, 137.0, 135.8, 135.2, 135.1, 133.4, 133.3, 133.1, 130.8, 130.1, 130.0, 129.9, 129.8, 129.7, 129.6, 129.5, 129.4, 129.3, 129.2, 129.1, 128.8, 128.7, 128.6, 128.6, 128.2, 128.2, 128.1, 128.0, 127.8, 127.6, 127.5, 127.0, 126.7, 126.4, 126.3, 126.2, 125.7, 125.2, 124.9, 124.6, 123.8, 123.1, 122.8, 122.3, 117.2, 114.7, 37.4, 36.5. **IR** (KBr, cm<sup>-1</sup>) 3728, 3059, 2922, 1957, 1815, 1662, 1593, 1486, 1450, 1373, 1326, 1276, 1168, 1067, 1025, 891, 838, 755, 605, 508. **HRMS** (ESI) Calcd for  $C_{40}H_{26}O_2$  (M+H)<sup>+</sup> 539.2006, found 539.2009.

**1-(10-Hexyl-2-methyl-4-phenyl-9H-fluoreno[2,3-*b*]furan-3-yl)ethan-1-one (3al)**

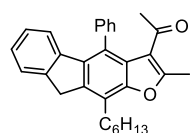

White solid, m. p. = 100-101 °C, yield: 95%. <sup>1</sup>H NMR (400 MHz, CDCl<sub>3</sub>) δ 7.50 (d, *J* = 6.6 Hz, 4H), 7.46 (d, *J* = 6.9 Hz, 2H), 7.17 (t, *J* = 7.2 Hz, 1H), 7.00 (t, *J* = 7.6 Hz, 1H), 6.77 (d, *J* = 7.9 Hz, 1H), 3.95 (s, 2H), 3.02 (t, *J* = 7.7 Hz, 2H), 2.48 (s, 3H), 1.82 – 1.76 (m, 2H), 1.51 (s, 3H), 1.47 (s, 2H), 1.36 (s, 4H), 0.91 (t, *J* = 6.4

Hz, 3H). <sup>13</sup>C NMR (100 MHz, CDCl<sub>3</sub>) δ 199.4, 156.5, 151.7, 143.6, 142.0, 139.5, 134.7, 130.2, 129.1, 128.2, 127.1, 126.3, 125.9, 124.9, 124.7, 122.7, 121.9, 121.2, 35.2, 31.8, 30.6, 29.6, 29.2, 27.6, 22.7, 14.2, 13.5. **IR** (KBr, cm<sup>-1</sup>) 3058, 2926, 2859, 1682, 1584, 1452, 1387, 1342, 1265, 1160, 1032, 953, 730, 622. **HRMS** (ESI) Calcd for  $C_{30}H_{30}O_2$  (M+H)<sup>+</sup> 423.2319, found 423.2318.

**1-(2-Methyl-10-pentyl-4-phenyl-9H-fluoreno[2,3-*b*]furan-3-yl)ethan-1-one (3am)**

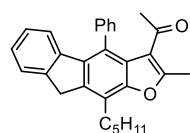

White solid, m. p. = 118-119 °C, yield: 88%. <sup>1</sup>H NMR (400 MHz, CDCl<sub>3</sub>) δ 7.52 – 7.41 (m, 6H), 7.15 (t, *J* = 7.3 Hz, 1H), 6.99 (t, *J* = 7.6 Hz, 1H), 6.77 (d, *J* = 7.9 Hz, 1H), 3.93 (s, 2H), 3.04 – 2.94 (m, 2H), 2.48 (s, 3H), 1.86 – 1.76 (m, 2H), 1.51 (s, 3H), 1.44 (dd, *J* = 8.3, 4.9 Hz, 4H), 0.93 (t, *J* = 6.9 Hz, 3H). <sup>13</sup>C NMR (100 MHz,

CDCl<sub>3</sub>) δ 199.4, 156.5, 151.7, 143.6, 142.0, 139.5, 134.8, 130.2, 129.2, 128.2, 127.1, 126.3, 125.9, 124.9, 124.7, 123.3, 122.7, 121.9, 121.2, 35.2, 32.0, 30.6, 29.0, 27.6, 22.6, 14.1, 13.5. **IR** (KBr, cm<sup>-1</sup>) 3718, 3059, 2928, 2861, 2315, 1681, 1582, 1452, 1388, 1339, 1263, 1157, 1092, 1023, 952, 802, 756, 624. **HRMS** (ESI) Calcd for  $C_{29}H_{28}O_2$  (M+H)<sup>+</sup> 409.2162, found 409.2161.

**1-(10-Butyl-2-methyl-4-phenyl-9H-fluoreno[2,3-*b*]furan-3-yl)ethan-1-one (3an)**

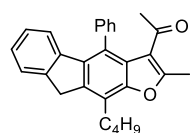

White solid, m. p. = 139-149 °C, yield: 86%. <sup>1</sup>H NMR (400 MHz, CDCl<sub>3</sub>) δ 7.54 (d, *J* = 5.6 Hz, 4H), 7.49 (d, *J* = 7.4 Hz, 2H), 7.20 (t, *J* = 7.4 Hz, 1H), 7.04 (t, *J* = 7.6 Hz, 1H), 6.81 (d, *J* = 7.9 Hz, 1H), 3.99 (s, 2H), 3.06 (t, *J* = 7.7 Hz, 2H), 2.52 (s, 3H), 1.86 – 1.78 (m, 2H), 1.55 (s, 3H), 1.54 – 1.47 (m, 2H), 1.04 (t, *J* = 7.3 Hz, 3H).

<sup>13</sup>C NMR (100 MHz, CDCl<sub>3</sub>) δ 199.4, 156.5, 151.7, 143.6, 142.0, 139.5, 134.8, 130.2, 129.3, 129.2, 128.2, 127.1, 126.3, 125.9, 124.9, 124.7, 122.7, 121.8, 121.2, 35.2, 31.5, 30.6, 27.3, 23.0, 14.1, 13.5. **IR** (KBr, cm<sup>-1</sup>) 3728, 3058, 2939, 2865, 1681, 1584, 1452, 1386, 1267, 1159, 1069, 1023, 953, 755, 626. **HRMS** (ESI) Calcd for  $C_{28}H_{26}O_2$  (M+Na)<sup>+</sup> 417.1825, found 417.1830.



### 1-(10-(Tert-butyl)-2-methyl-4-phenyl-9H-fluoreno[2,3-*b*]furan-3-yl)ethan-1-one (3ao)

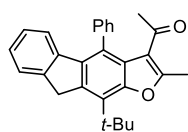

White solid, m. p. = 177-178 °C, yield: 94%.  $^1\text{H NMR}$  (400 MHz,  $\text{CDCl}_3$ )  $\delta$  7.46 (dt,  $J = 8.5, 3.9$  Hz, 6H), 7.14 (t,  $J = 7.4$  Hz, 1H), 6.95 (t,  $J = 7.6$  Hz, 1H), 6.62 (d,  $J = 7.9$  Hz, 1H), 4.26 (s, 2H), 2.47 (s, 3H), 1.73 (s, 9H), 1.52 (s, 3H).  $^{13}\text{C NMR}$  (100 MHz,  $\text{CDCl}_3$ )  $\delta$  199.7, 155.2, 151.8, 143.9, 140.7, 139.5, 137.6, 136.1, 130.2, 130.0, 129.2, 128.3, 127.6, 126.2, 126.1, 125.9, 124.1, 122.7, 120.6, 39.0, 37.3, 31.7, 30.7, 13.4. **IR** (KBr,  $\text{cm}^{-1}$ ) 3713, 3046, 2920, 2851, 1680, 1591, 1451, 1369, 1232, 1139, 1027, 953, 807, 757, 696, 626. **HRMS** (ESI) Calcd for  $\text{C}_{28}\text{H}_{26}\text{O}_2$  ( $\text{M}+\text{H}$ ) $^+$  395.2006, found 395.2005.

### 1-(4-(4-Ethylphenyl)-10-hexyl-2-methyl-9H-fluoreno[2,3-*b*]furan-3-yl)ethan-1-one (3ba)

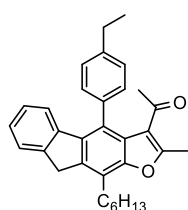

Colorless oil, yield: 56%.  $^1\text{H NMR}$  (400 MHz,  $\text{CDCl}_3$ )  $\delta$  7.50 (d,  $J = 7.4$  Hz, 1H), 7.35 (q,  $J = 8.0$  Hz, 4H), 7.16 (t,  $J = 7.4$  Hz, 1H), 7.01 (t,  $J = 7.6$  Hz, 1H), 6.85 (d,  $J = 7.9$  Hz, 1H), 3.94 (s, 2H), 3.01 (t,  $J = 7.7$  Hz, 2H), 2.77 (q,  $J = 7.6$  Hz, 2H), 2.47 (s, 3H), 1.83 – 1.74 (m, 2H), 1.47 (s, 5H), 1.34 (dd,  $J = 13.6, 5.9$  Hz, 7H), 0.91 (t,  $J = 6.6$  Hz, 3H).  $^{13}\text{C NMR}$  (100 MHz,  $\text{CDCl}_3$ )  $\delta$  199.8, 156.5, 151.7, 144.4, 143.6, 142.1, 139.5, 136.7, 134.7, 130.1, 128.6, 127.2, 126.3, 125.8, 125.1, 124.7, 122.7, 121.7, 121.3, 35.2, 31.8, 30.5, 29.6, 29.3, 28.8, 27.6, 22.7, 15.8, 14.2, 13.4. **IR** (KBr,  $\text{cm}^{-1}$ ) 3729, 2927, 2861, 1680, 1583, 1454, 1388, 1264, 1157, 1025, 953, 836, 625. **HRMS** (ESI) Calcd for  $\text{C}_{32}\text{H}_{34}\text{O}_2$  ( $\text{M}+\text{Na}$ ) $^+$  473.2451, found 473.2449.

### 1-(4-(4-(Tert-butyl)phenyl)-10-hexyl-2-methyl-9H-fluoreno[2,3-*b*]furan-3-yl)ethan-1-one (3bb)

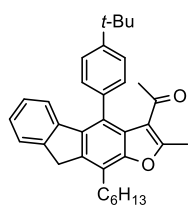

Colorless oil, yield: 60%.  $^1\text{H NMR}$  (400 MHz,  $\text{CDCl}_3$ )  $\delta$  7.42 (t,  $J = 8.3$  Hz, 3H), 7.29 (d,  $J = 7.9$  Hz, 2H), 7.08 (t,  $J = 7.4$  Hz, 1H), 6.93 (t,  $J = 7.6$  Hz, 1H), 6.77 (d,  $J = 7.9$  Hz, 1H), 3.85 (s, 2H), 2.92 (t,  $J = 7.7$  Hz, 2H), 2.39 (s, 3H), 1.71 (dd,  $J = 14.9, 7.4$  Hz, 2H), 1.38 (d,  $J = 8.5$  Hz, 2H), 1.34 (s, 12H), 1.31 – 1.24 (m, 4H), 0.83 (t,  $J = 6.6$  Hz, 3H).  $^{13}\text{C NMR}$  (101 MHz,  $\text{CDCl}_3$ )  $\delta$  199.6, 156.6, 151.7, 151.4, 143.6, 142.2, 139.5, 136.5, 134.8, 129.9, 127.1, 126.3, 126.0, 125.8, 125.1, 124.7, 122.8, 121.7, 121.4, 35.2, 34.8, 31.8, 31.5, 30.4, 29.6, 29.3, 27.6, 22.7, 14.2, 13.4. **IR** (KBr,  $\text{cm}^{-1}$ ) 3710, 3051, 2955, 2862, 1681, 1582, 1456, 1389, 1268, 1194, 1159, 1109, 1023, 952, 837, 758, 622, 561. **HRMS** (ESI) Calcd for  $\text{C}_{34}\text{H}_{38}\text{O}_2$  ( $\text{M}+\text{H}$ ) $^+$  479.2945, found 479.2946.

### 1-(4-(4-Fluorophenyl)-10-hexyl-2-methyl-9H-fluoreno[2,3-*b*]furan-3-yl)ethan-1-one (3bc)

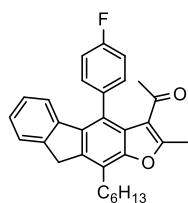

White solid, m. p. = 130-131 °C, yield: 74%.  $^1\text{H NMR}$  (400 MHz,  $\text{CDCl}_3$ )  $\delta$  7.50 (d,  $J = 7.4$  Hz, 1H), 7.45 – 7.37 (m, 2H), 7.21 (dd,  $J = 15.4, 7.8$  Hz, 3H), 7.03 (t,  $J = 7.6$  Hz, 1H), 6.72 (d,  $J = 7.9$  Hz, 1H), 3.94 (s, 2H), 3.01 (t,  $J = 7.7$  Hz, 2H), 2.49 (s, 3H), 1.83 – 1.75 (m, 2H), 1.63 (s, 3H), 1.50 – 1.42 (m, 2H), 1.40 – 1.28 (m, 4H), 0.91 (t,  $J = 6.7$  Hz, 3H).  $^{13}\text{C NMR}$  (100 MHz,  $\text{CDCl}_3$ )  $\delta$  199.0, 162.7 (d,  $J = 247.9$  Hz), 156.5, 151.7, 143.7, 141.9, 139.5, 135.5 (d,  $J = 3.3$  Hz), 135.0, 131.9, 131.8, 131.3, 128.3, 126.4, 126.0, 125.8, 125.0, 124.8, 122.5, 122.1, 121.0, 116.16 (d,  $J = 21.3$  Hz), 35.2, 31.8, 30.9, 29.6, 29.2, 27.6, 22.7, 14.2, 13.5.  $^{19}\text{F NMR}$  (376 MHz,  $\text{CDCl}_3$ )  $\delta$  -113.4. **IR** (KBr,  $\text{cm}^{-1}$ ) 3713, 3063, 2929, 2860, 2315, 1682, 1589, 1508, 1455, 1389, 1340, 1226, 1155, 1088, 1022, 951, 839, 728, 626, 517. **HRMS** (ESI) Calcd for  $\text{C}_{30}\text{H}_{29}\text{FO}_2$  ( $\text{M}+\text{H}$ ) $^+$  441.2224, found 441.2230.

**1-(4-(4-Chlorophenyl)-10-hexyl-2-methyl-9H-fluoreno[2,3-b]furan-3-yl)ethan-1-one (3bd)**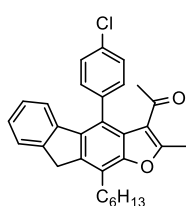

White solid, m. p. = 103-104 °C, yield: 98%.  $^1\text{H NMR}$  (400 MHz, DMSO)  $\delta$  7.49 (d,  $J = 7.8$  Hz, 3H), 7.38 (d,  $J = 7.6$  Hz, 2H), 7.18 (t,  $J = 7.4$  Hz, 1H), 7.03 (t,  $J = 7.6$  Hz, 1H), 6.76 (d,  $J = 7.9$  Hz, 1H), 3.92 (s, 2H), 3.00 (t,  $J = 7.6$  Hz, 2H), 2.49 (s, 3H), 1.82 – 1.74 (m, 2H), 1.63 (s, 3H), 1.45 (d,  $J = 7.3$  Hz, 2H), 1.36 (s, 4H), 0.91 (t,  $J = 6.4$  Hz, 3H).  $^{13}\text{C NMR}$  (100 MHz, DMSO)  $\delta$  198.9, 156.6, 151.7, 143.7, 141.8, 139.6, 137.9, 134.8, 134.2, 131.6, 129.4, 126.4, 126.1, 125.6, 124.9, 124.8, 122.5, 122.3, 121.0, 35.2, 31.8, 30.9, 29.6, 29.2, 27.6, 22.7, 14.2, 13.6. **IR** (KBr,  $\text{cm}^{-1}$ ) 3710, 2926, 2859, 1682, 1583, 1453, 1389, 1342, 1262, 1160, 1090, 1019, 952, 830, 727, 625, 502. **HRMS** (ESI) Calcd for  $\text{C}_{30}\text{H}_{29}\text{ClO}_2$  ( $\text{M}+\text{H}$ ) $^+$  457.1929, found 457.1930.

**1-(4-(4-Bromophenyl)-10-hexyl-2-methyl-9H-fluoreno[2,3-b]furan-3-yl)ethan-1-one (3be)**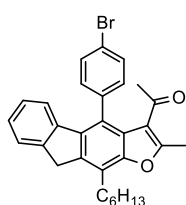

White solid, m. p. = 109-110 °C, yield: 78%.  $^1\text{H NMR}$  (400 MHz,  $\text{CDCl}_3$ )  $\delta$  7.64 (d,  $J = 8.2$  Hz, 2H), 7.49 (d,  $J = 7.4$  Hz, 1H), 7.32 (d,  $J = 8.2$  Hz, 2H), 7.18 (t,  $J = 7.4$  Hz, 1H), 7.04 (t,  $J = 7.6$  Hz, 1H), 6.77 (d,  $J = 7.9$  Hz, 1H), 3.92 (s, 2H), 3.06 – 2.92 (m, 2H), 2.49 (s, 3H), 1.82 – 1.73 (m, 2H), 1.62 (s, 3H), 1.49 – 1.42 (m, 2H), 1.35 (dd,  $J = 9.2, 5.9$  Hz, 4H), 0.91 (t,  $J = 6.7$  Hz, 3H).  $^{13}\text{C NMR}$  (100 MHz,  $\text{CDCl}_3$ )  $\delta$  198.9, 156.6, 151.7, 143.7, 141.7, 139.6, 138.4, 134.7, 132.3, 131.9, 131.0, 126.4, 126.1, 125.5, 124.9, 124.7, 122.5, 122.3, 121.0, 35.2, 31.8, 30.9, 29.6, 29.2, 27.6, 22.7, 14.2, 13.6. **IR** (KBr,  $\text{cm}^{-1}$ ) 2926, 2860, 1680, 1583, 1453, 1391, 1230, 1071, 1014, 956, 896, 827, 726, 627, 498. **HRMS** (ESI) Calcd for  $\text{C}_{30}\text{H}_{29}\text{BrO}_2$  ( $\text{M}+\text{H}$ ) $^+$  501.1424, found 501.1425.

**1-(10-Hexyl-2-methyl-4-(4-(trifluoromethyl)phenyl)-9H-fluoreno[2,3-b]furan-3-yl)ethan-1-one (3bf)**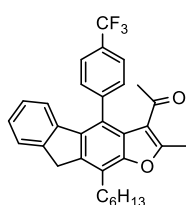

White solid, m. p. = 145-146 °C, yield: 75%.  $^1\text{H NMR}$  (400 MHz,  $\text{CDCl}_3$ )  $\delta$  7.72 (d,  $J = 7.8$  Hz, 2H), 7.52 (d,  $J = 7.8$  Hz, 2H), 7.45 (d,  $J = 7.4$  Hz, 1H), 7.12 (t,  $J = 7.4$  Hz, 1H), 6.95 (t,  $J = 7.6$  Hz, 1H), 6.58 (d,  $J = 7.9$  Hz, 1H), 3.88 (s, 2H), 2.95 (t,  $J = 7.7$  Hz, 2H), 2.43 (s, 3H), 1.76 – 1.68 (m, 2H), 1.50 (s, 3H), 1.39 (d,  $J = 7.4$  Hz, 2H), 1.28 (d,  $J = 11.8$  Hz, 4H), 0.84 (t,  $J = 6.6$  Hz, 3H).  $^{13}\text{C NMR}$  (100 MHz,  $\text{CDCl}_3$ )  $\delta$  198.5, 156.8, 151.7, 143.7, 143.4, 141.5, 139.7, 134.7, 130.7, 130.4 (q,  $J = 32.6$  Hz), 126.5, 126.2, 126.0 (q,  $J = 3.6$  Hz), 125.3, 124.9, 124.6, 122.9, 122.6, 122.4, 120.9, 117.7, 35.2, 31.8, 30.7, 29.6, 29.2, 27.6, 22.7, 14.1, 13.6.  $^{19}\text{F NMR}$  (376 MHz,  $\text{CDCl}_3$ )  $\delta$  -62.3. **IR** (KBr,  $\text{cm}^{-1}$ ) 3711, 2929, 2861, 1685, 1580, 1456, 1395, 1323, 1264, 1165, 1125, 1067, 1020, 952, 846, 759, 725, 619. **HRMS** (ESI) Calcd for  $\text{C}_{31}\text{H}_{29}\text{F}_3\text{O}_2$  ( $\text{M}+\text{H}$ ) $^+$  491.2192, found 491.2193.

**1-(10-Hexyl-4-(4-methoxyphenyl)-2-methyl-9H-fluoreno[2,3-b]furan-3-yl)ethan-1-one (3bg)**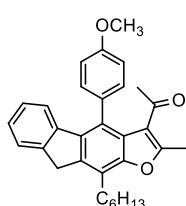

White solid, m. p. = 117-118 °C, yield: 61%.  $^1\text{H NMR}$  (400 MHz,  $\text{CDCl}_3$ )  $\delta$  7.54 (d,  $J = 7.4$  Hz, 1H), 7.40 (d,  $J = 8.2$  Hz, 2H), 7.21 (t,  $J = 7.4$  Hz, 1H), 7.07 (t,  $J = 9.0$  Hz, 3H), 6.89 (d,  $J = 7.8$  Hz, 1H), 3.96 (d,  $J = 7.5$  Hz, 5H), 3.04 (t,  $J = 7.7$  Hz, 2H), 2.52 (s, 3H), 1.87 – 1.79 (m, 2H), 1.62 (s, 3H), 1.50 (d,  $J = 7.3$  Hz, 2H), 1.44 – 1.35 (m, 4H), 0.96 (t,  $J = 6.7$  Hz, 3H).  $^{13}\text{C NMR}$  (100 MHz,  $\text{CDCl}_3$ )  $\delta$  199.6, 159.5, 156.3, 151.7, 143.6, 142.2, 139.5, 135.1, 131.8, 131.3, 126.8, 126.3, 125.8,

125.3, 124.7, 122.7, 121.7, 121.3, 114.5, 55.4, 35.2, 31.8, 30.8, 29.6, 29.3, 27.6, 22.7, 14.2, 13.4. **IR** (KBr,  $\text{cm}^{-1}$ ) 3714, 2929, 2859, 2314, 1682, 1597, 1513, 1454, 1389, 1342, 1284, 1246, 1173, 1105, 1031, 951, 834, 758, 728, 624. **HRMS** (ESI) Calcd for  $\text{C}_{31}\text{H}_{32}\text{O}_3$  ( $\text{M}+\text{H}$ )<sup>+</sup> 453.2424, found 453.2426.

#### 4-(3-Acetyl-10-hexyl-2-methyl-9H-fluoreno[2,3-*b*]furan-4-yl)benzonitrile (3bh)

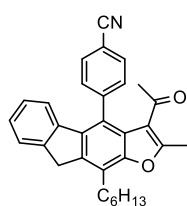

White solid, m. p. = 133-134 °C, yield: 58%. **<sup>1</sup>H NMR** (400 MHz,  $\text{CDCl}_3$ )  $\delta$  7.85 (d,  $J$  = 7.9 Hz, 2H), 7.59 (d,  $J$  = 8.0 Hz, 2H), 7.55 (d,  $J$  = 7.4 Hz, 1H), 7.23 (t,  $J$  = 7.4 Hz, 1H), 7.06 (t,  $J$  = 7.6 Hz, 1H), 6.59 (d,  $J$  = 7.9 Hz, 1H), 3.98 (s, 2H), 3.05 (t,  $J$  = 7.7 Hz, 2H), 2.57 (s, 3H), 1.85 – 1.80 (m, 2H), 1.79 (s, 3H), 1.53 – 1.46 (m, 2H), 1.43 – 1.35 (m, 4H), 0.95 (t,  $J$  = 6.7 Hz, 3H). **<sup>13</sup>C NMR** (100 MHz,  $\text{CDCl}_3$ )  $\delta$  197.6, 157.2, 151.7, 144.6, 143.7, 141.4, 139.7, 134.7, 132.7, 131.1, 126.5, 126.3, 125.0, 125.0, 124.2, 122.8, 122.3, 120.6, 118.8, 111.9, 35.2, 31.8, 31.0, 29.5, 29.2, 27.6, 22.7, 14.2, 14.0. **IR** (KBr,  $\text{cm}^{-1}$ ) 3714, 3060, 2928, 2860, 2314, 2227, 1686, 1593, 1454, 1394, 1340, 1265, 1193, 1103, 1023, 952, 841, 758, 613, 553. **HRMS** (ESI) Calcd for  $\text{C}_{31}\text{H}_{29}\text{NO}_2$  ( $\text{M}+\text{H}$ )<sup>+</sup> 448.2271, found 448.2276.

#### 1-(10-Hexyl-2-methyl-4-(*m*-tolyl)-9H-fluoreno[2,3-*b*]furan-3-yl)ethan-1-one (3bi)

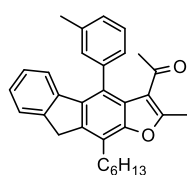

Colorless oil, m. p. = 177-178 °C, yield: 67%. **<sup>1</sup>H NMR** (400 MHz,  $\text{CDCl}_3$ )  $\delta$  7.42 (d,  $J$  = 7.4 Hz, 1H), 7.31 (d,  $J$  = 7.6 Hz, 1H), 7.20 – 7.16 (m, 3H), 7.09 (t,  $J$  = 7.3 Hz, 1H), 6.94 (t,  $J$  = 7.6 Hz, 1H), 6.78 (d,  $J$  = 7.8 Hz, 1H), 3.86 (s, 2H), 2.93 (t,  $J$  = 7.7 Hz, 2H), 2.40 (s, 3H), 2.32 (s, 3H), 1.74 – 1.67 (m, 2H), 1.43 (s, 3H), 1.37 (d,  $J$  = 7.2 Hz, 2H), 1.28 (d,  $J$  = 3.1 Hz, 4H), 0.83 (t,  $J$  = 6.7 Hz, 3H). **<sup>13</sup>C NMR** (100 MHz,  $\text{CDCl}_3$ )  $\delta$  199.5, 156.3, 151.7, 143.6, 142.1, 139.5, 139.3, 138.9, 134.6, 130.8, 129.0, 128.8, 127.3, 126.3, 125.8, 124.9, 124.7, 123.3, 122.8, 121.7, 121.3, 35.2, 31.8, 30.6, 29.6, 29.3, 27.6, 22.7, 21.5, 14.2, 13.5. **IR** (KBr,  $\text{cm}^{-1}$ ) 3692, 3045, 2926, 2860, 1683, 1588, 1453, 1386, 1343, 1271, 1207, 1155, 1034, 954, 882, 625. **HRMS** (ESI) Calcd for  $\text{C}_{31}\text{H}_{32}\text{O}_2$  ( $\text{M}+\text{Na}$ )<sup>+</sup> 459.2295, found 459.2297.

#### 1-(10-Hexyl-2-methyl-4-(thiophen-2-yl)-9H-fluoreno[2,3-*b*]furan-3-yl)ethan-1-one (3bj)

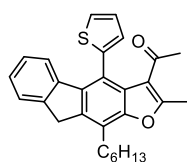

White solid, m. p. = 105-106 °C, yield: 63%. **<sup>1</sup>H NMR** (400 MHz,  $\text{CDCl}_3$ )  $\delta$  7.56 – 7.46 (m, 2H), 7.27 (d,  $J$  = 2.0 Hz, 1H), 7.19 (dd,  $J$  = 13.3, 6.1 Hz, 2H), 7.07 (t,  $J$  = 7.6 Hz, 1H), 6.87 (d,  $J$  = 7.8 Hz, 1H), 3.93 (s, 2H), 3.00 (t,  $J$  = 7.7 Hz, 2H), 2.48 (s, 3H), 1.83 – 1.74 (m, 2H), 1.68 (s, 3H), 1.49 – 1.42 (m, 2H), 1.40 – 1.30 (m, 4H), 0.91 (t,  $J$  = 6.8 Hz, 3H). **<sup>13</sup>C NMR** (100 MHz,  $\text{CDCl}_3$ )  $\delta$  199.4, 156.4, 151.7, 143.6, 141.9, 139.7, 139.4, 135.6, 129.9, 126.6, 126.5, 126.0, 125.6, 124.7, 124.3, 122.5, 122.2, 121.4, 121.2, 35.2, 31.8, 30.2, 29.6, 29.2, 27.6, 22.7, 14.2, 13.5. **IR** (KBr,  $\text{cm}^{-1}$ ) 3443, 3101, 2925, 2859, 1680, 1585, 1454, 1385, 1260, 1201, 1154, 1038, 955, 841, 758, 726, 640. **HRMS** (ESI) Calcd for  $\text{C}_{31}\text{H}_{32}\text{O}_2$  ( $\text{M}+\text{Na}$ )<sup>+</sup> 459.2295, found 459.2297.

#### 1-(4-([1,1'-Biphenyl]-4-yl)-10-hexyl-2-methyl-9H-fluoreno[2,3-*b*]furan-3-yl)ethan-1-one (3bk)

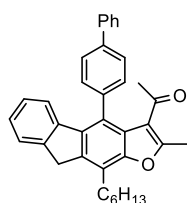

White solid, m. p. = 148-149 °C, yield: 83%. **<sup>1</sup>H NMR** (400 MHz,  $\text{CDCl}_3$ )  $\delta$  7.83 (dd,  $J$  = 11.4, 7.8 Hz, 4H), 7.64 – 7.54 (m, 5H), 7.46 (t,  $J$  = 7.3 Hz, 1H), 7.25 (t,  $J$  = 7.4 Hz, 1H), 7.10 (t,  $J$  = 7.5 Hz, 1H), 7.02 (d,  $J$  = 7.9 Hz, 1H), 4.02 (s, 2H), 3.09 (t,  $J$  = 7.6 Hz, 2H), 2.57 (s, 3H), 1.94 – 1.82 (m, 2H), 1.63 (s, 3H), 1.56 (s, 2H), 1.45 (d,  $J$  = 3.1 Hz, 4H), 1.01 (d,  $J$  = 7.0 Hz, 3H). **<sup>13</sup>C NMR** (100 MHz,  $\text{CDCl}_3$ )  $\delta$  199.4, 156.6, 151.8, 143.7, 142.0, 140.8, 140.4, 139.6, 138.5, 134.8, 130.7, 129.0, 127.7,

127.1, 126.7, 126.4, 126.0, 125.0, 124.8, 122.8, 122.0, 121.3, 35.2, 31.8, 30.8, 29.6, 29.3, 27.7, 22.8, 14.2, 13.5. **IR** (KBr,  $\text{cm}^{-1}$ ) 3714, 3054, 2926, 2859, 2315, 1683, 1585, 1456, 1342, 1265, 1018, 952, 842, 755, 624. **HRMS** (ESI) Calcd for  $\text{C}_{34}\text{H}_{32}\text{O}_2$  ( $\text{M}+\text{Na}$ )<sup>+</sup> 495.2295, found 495.2283.

**1-(10-Hexyl-2-methyl-4-(naphthalen-2-yl)-9H-fluoreno[2,3-b]furan-3-yl)ethan-1-one (3bl)**

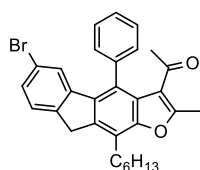

White solid, m. p. = 117-118 °C, yield: 68%. **<sup>1</sup>H NMR** (400 MHz,  $\text{CDCl}_3$ )  $\delta$  7.56 (s, 3H), 7.46 (s, 2H), 7.36 (s, 1H), 7.31 (s, 1H), 6.85 (s, 1H), 3.91 (s, 2H), 3.02 (s, 2H), 2.52 (s, 3H), 1.80 (d,  $J = 6.7$  Hz, 2H), 1.55 (s, 3H), 1.49 (s, 2H), 1.38 (s, 4H), 0.94 (s, 3H). **<sup>13</sup>C NMR** (100 MHz,  $\text{CDCl}_3$ )  $\delta$  199.2, 156.9, 151.9, 144.1, 142.2, 139.7, 138.8, 133.6, 129.9, 129.3, 128.5, 127.5, 125.9, 125.8, 124.9, 122.0, 121.1, 120.3,

34.8, 31.8, 30.7, 29.6, 29.2, 27.6, 22.7, 14.2, 13.5. **IR** (KBr,  $\text{cm}^{-1}$ ). 3849, 3704, 3522, 3498, 2925, 1682, 1588, 1448, 655. **HRMS** (ESI) Calcd for  $\text{C}_{30}\text{H}_{29}\text{BrO}_2$  ( $\text{M}+\text{H}$ )<sup>+</sup> 501.1424, found 501.1421.

**1-(10-Hexyl-2,6-dimethyl-4-phenyl-9H-fluoreno[2,3-b]furan-3-yl)ethan-1-one (3bm)**

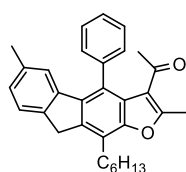

White solid, m. p. = 116-117 °C, yield: 63%. **<sup>1</sup>H NMR** (400 MHz,  $\text{CDCl}_3$ )  $\delta$  7.51 (d,  $J = 14.1$  Hz, 5H), 7.41 (d,  $J = 7.1$  Hz, 1H), 7.02 (d,  $J = 7.2$  Hz, 1H), 6.58 (s, 1H), 3.93 (s, 2H), 3.03 (s, 2H), 2.51 (s, 3H), 2.15 (s, 3H), 1.81 (s, 2H), 1.55 (s, 3H), 1.49 (s, 2H), 1.39 (s, 4H), 0.94 (s, 3H). **<sup>13</sup>C NMR** (100 MHz,  $\text{CDCl}_3$ )  $\delta$  199.5, 156.5, 151.6, 142.1, 140.7, 139.9, 139.5, 135.7, 134.8, 130.2, 129.1, 128.1, 127.0, 126.8,

124.7, 124.4, 123.5, 121.8, 121.2, 34.8, 31.8, 30.7, 29.6, 29.26, 27.6, 22.7, 21.7, 14.2, 13.5. **IR** (KBr,  $\text{cm}^{-1}$ ) 3925, 3817, 3742, 3565, 3524, 3481, 3456, 3425, 2927, 1680, 1581, 1460, 1387, 1284, 1264, 1208, 1111, 1072, 1029, 952, 805, 724, 702, 627. **HRMS** (ESI) Calcd for  $\text{C}_{31}\text{H}_{32}\text{O}_2$  ( $\text{M}+\text{Na}$ )<sup>+</sup> 459.2295, found 459.2290.

**1.5 Optimization of the reaction conditions for synthesis of 6a**

Table S2. Optimization of the reaction conditions for synthesis of **6a**<sup>a</sup>

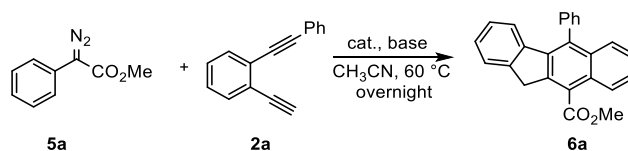

| Entry          | Cat. (5 mol %)                        | Base                 | Yield (%) <sup>b</sup> |
|----------------|---------------------------------------|----------------------|------------------------|
| 1              | CuBr                                  | -                    | 12                     |
| 2              | CuCl                                  | -                    | 41                     |
| 3              | $\text{Cu}(\text{MeCN})_4\text{PF}_4$ | -                    | 45                     |
| <b>4</b>       | <b>CuI</b>                            | -                    | <b>68<sup>c</sup></b>  |
| 5              | CuI                                   | i-Pr <sub>2</sub> NH | 59                     |
| 6 <sup>d</sup> | CuI                                   | -                    | 51                     |

<sup>a</sup>The reaction was performed at 60 °C overnight. The molar ratio of **5a:2a** = 1.5:1. [**2a**] = 0.1M.

<sup>b</sup>Yield of **6a** determined by <sup>1</sup>H NMR spectroscopy. <sup>c</sup>Isolated yield of **6a**. <sup>d</sup>**5a:2a** = 1:1.

## 1.6 General procedure for the synthesis of 6a-6j

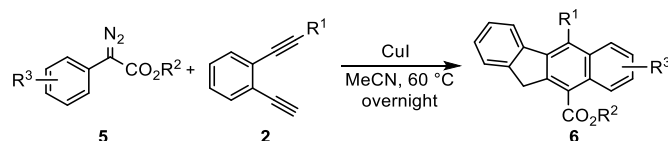

To an acetonitrile (MeCN, 1.0 mL) suspension of CuI (10 mol %) in Schlenk tube with a magnetic bar under nitrogen atmosphere, was added alkyne (**2**, 0.1 mmol) and diazonium (**5**, 0.15 mmol). The reaction was stirred at 60 °C unless being noted and monitored by TLC. After accomplished, the reaction mixture was purified by chromatography with petroleum/ethyl acetate(v/v: 20/1) to obtain **6**.

### Methyl 5-phenyl-11H-benzo[*b*]fluorene-10-carboxylate (**6a**)

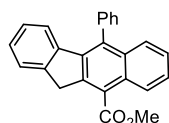

White solid, m. p. = 145-146 °C, yield = 68%; <sup>1</sup>H NMR (400 MHz, CDCl<sub>3</sub>) δ 8.42 (d, *J* = 8.5 Hz, 1H), 7.54 (dt, *J* = 16.7, 7.3 Hz, 6H), 7.38 (t, *J* = 8.0 Hz, 3H), 7.22 (t, *J* = 7.4 Hz, 1H), 7.01 (t, *J* = 7.6 Hz, 1H), 6.40 (d, *J* = 7.9 Hz, 1H), 4.01 (s, 2H), 4.29 (s, 2H), 4.11 (s, 3H). <sup>13</sup>C NMR (100MHz, CDCl<sub>3</sub>) δ 168.9, 143.9, 142.8, 140.4, 138.6, 137.4, 136.8, 133.2, 129.8, 129.7, 129.3, 128.1, 127.5, 126.8, 126.6, 126.6, 125.7, 125.3, 124.9, 124.7, 123.7, 52.2, 37.5. IR (KBr, cm<sup>-1</sup>) 3777, 3437, 3061, 2955, 1719, 1633, 1441, 1392, 1254, 1210, 1037, 969, 752, 598. HRMS (ESI) Calcd for C<sub>25</sub>H<sub>18</sub>O<sub>2</sub> (M+H)<sup>+</sup> 351.1380, found 351.1381.

### Methyl 7-fluoro-5-phenyl-11H-benzo[*b*]fluorene-10-carboxylate (**6b**)

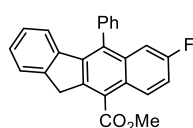

White solid, m. p. = 126-127 °C, yield = 56%; <sup>1</sup>H NMR (400 MHz, CDCl<sub>3</sub>) δ 8.42 – 8.29 (m, 1H), 7.47 (d, *J* = 3.8 Hz, 3H), 7.38 (d, *J* = 7.5 Hz, 1H), 7.24 – 7.15 (m, 3H), 7.12 (t, *J* = 7.3 Hz, 1H), 7.05 (d, *J* = 11.0 Hz, 1H), 6.90 (t, *J* = 7.6 Hz, 1H), 6.29 (d, *J* = 7.9 Hz, 1H), 4.15 (s, 2H), 3.99 (s, 3H). <sup>13</sup>C NMR (100 MHz, CDCl<sub>3</sub>) δ 168.6, 160.6 (d, *J* = 245.9 Hz), 144.1, 142.4, 140.1, 138.5, 138.1, 136.2, 136.2, 134.6, 134.6, 129.6, 129.4, 128.4, 127.9, 126.7, 124.8, 123.8, 116.7, 116.4, 110.4, 110.2, 52.2, 37.6. <sup>19</sup>F NMR (376 MHz, CDCl<sub>3</sub>) δ -114.2. IR (KBr, cm<sup>-1</sup>) 3714, 3061, 2952, 1719, 1619, 1508, 1437, 1210, 1124, 1038, 966, 864, 825, 751, 587, 453. HRMS (ESI) Calcd for C<sub>25</sub>H<sub>17</sub>FO<sub>2</sub> (M+H)<sup>+</sup> 369.1285, found 369.1289.

### Methyl 7-chloro-5-phenyl-11H-benzo[*b*]fluorene-10-carboxylate (**6c**)

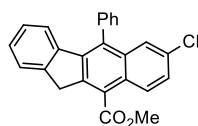

White solid, m. p. = 173-174 °C, yield = 55%; <sup>1</sup>H NMR (400 MHz, CDCl<sub>3</sub>) δ 8.41 (d, *J* = 9.1 Hz, 1H), 7.62 (d, *J* = 5.6 Hz, 3H), 7.51 (d, *J* = 6.2 Hz, 2H), 7.47 (d, *J* = 9.2 Hz, 1H), 7.36 (d, *J* = 7.2 Hz, 2H), 7.25 (s, 1H), 7.02 (t, *J* = 7.6 Hz, 1H), 6.37 (d, *J* = 7.9 Hz, 1H), 4.29 (s, 2H), 4.13 (s, 3H). <sup>13</sup>C NMR (100 MHz, CDCl<sub>3</sub>) δ 168.5, 144.0, 143.3, 140.0, 138.6, 137.8, 136.0, 134.2, 131.9, 129.7, 129.4, 128.4, 128.1, 127.9, 127.3, 127.1, 126.7, 125.5, 124.7, 123.8, 52.3, 37.7. IR (KBr, cm<sup>-1</sup>) 3731, 3061, 2952, 1720, 1600, 1489, 1443, 1396, 1247, 1148, 1090, 1039, 969, 883, 821, 756, 711, 599. HRMS (ESI) Calcd for C<sub>25</sub>H<sub>17</sub>ClO<sub>2</sub> (M+H)<sup>+</sup> 385.0990, found 385.0983.

### Methyl 7-methoxy-5-phenyl-11H-benzo[*b*]fluorene-10-carboxylate (**6d**)

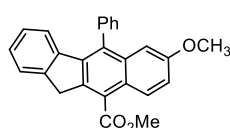

White solid, m. p. = 192-193 °C, yield = 46%; <sup>1</sup>H NMR (400 MHz, CDCl<sub>3</sub>) δ 7.60 (d, *J* = 8.0 Hz, 2H), 7.56 – 7.49 (m, 7H), 7.43 (d, *J* = 7.4 Hz, 1H), 7.17 (t, *J* = 7.3 Hz, 1H), 7.01 (t, *J* = 7.6 Hz, 1H), 6.78 (d, *J* = 7.9 Hz, 1H), 3.94 (s, 2H), 2.42 (s, 3H), 1.55 (s, 3H). <sup>13</sup>C NMR (100MHz, CDCl<sub>3</sub>) δ 169.0, 157.2, 144.2, 140.6, 140.5, 138.8, 137.9, 135.8, 134.6, 129.7, 129.3, 128.1, 127.4, 126.9, 126.5, 125.3, 124.7, 124.6, 123.6, 118.5, 105.8, 55.1, 52.1, 37.5. IR (KBr, cm<sup>-1</sup>) 3460, 2918, 1733, 1624, 1509, 1428, 1242, 1149, 1030, 813. HRMS (ESI) Calcd for C<sub>26</sub>H<sub>20</sub>O<sub>3</sub> (M+H)<sup>+</sup> 381.1485, found 381.1485.

**Benzyl 5-phenyl-11H-benzo[*b*]fluorene-10-carboxylate (6e)**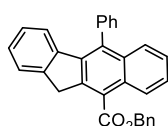

White solid, m. p. = 118-119 °C, yield = 61%;  $^1\text{H NMR}$  (400 MHz,  $\text{CDCl}_3$ )  $\delta$  8.41 (d,  $J = 8.6$  Hz, 1H), 7.58 (dd,  $J = 15.0, 6.9$  Hz, 6H), 7.42 (ddd,  $J = 19.9, 15.1, 7.4$  Hz, 8H), 7.21 (d,  $J = 7.4$  Hz, 1H), 7.00 (t,  $J = 7.6$  Hz, 1H), 6.39 (d,  $J = 7.9$  Hz, 1H), 5.60 (s, 2H), 4.24 (s, 2H).  $^{13}\text{C NMR}$  (100 MHz,  $\text{CDCl}_3$ )  $\delta$  168.4, 143.9, 142.7, 140.4, 138.6, 137.4, 136.9, 135.9, 133.2, 129.8, 129.8, 129.3, 128.8, 128.7, 128.5, 128.1, 127.5, 126.9, 126.7, 126.6, 125.7, 125.3, 124.9, 124.8, 123.7, 67.2, 37.5. **IR** (KBr,  $\text{cm}^{-1}$ ) 3458, 3063, 2955, 1454, 1393, 1248, 1207, 1137, 1036, 967, 756, 697, 594. **HRMS** (ESI) Calcd for  $\text{C}_{31}\text{H}_{22}\text{O}_2$  ( $\text{M}+\text{Na}$ ) $^+$  449.1512, found 449.1516.

**Isopropyl 5-phenyl-11H-benzo[*b*]fluorene-10-carboxylate (6f)**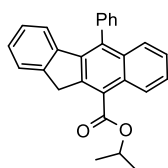

White solid, m. p. = 160-161 °C, yield = 85%;  $^1\text{H NMR}$  (400 MHz,  $\text{CDCl}_3$ )  $\delta$  8.39 (d,  $J = 8.5$  Hz, 1H), 7.62 – 7.49 (m, 6H), 7.38 (t,  $J = 7.0$  Hz, 3H), 7.21 (d,  $J = 6.5$  Hz, 1H), 7.02 (d,  $J = 7.6$  Hz, 1H), 6.41 (d,  $J = 7.8$  Hz, 1H), 5.60 – 5.47 (m, 1H), 4.29 (s, 2H), 1.53 (d,  $J = 6.1$  Hz, 6H).  $^{13}\text{C NMR}$  (100 MHz,  $\text{CDCl}_3$ )  $\delta$  168.1, 143.9, 141.9, 140.5, 138.7, 137.4, 136.5, 133.2, 129.8, 129.7, 129.3, 128.1, 127.5, 126.9, 126.7, 126.5, 125.8, 125.7, 125.2, 124.8, 123.7, 69.1, 37.3, 22.3. **IR** (KBr,  $\text{cm}^{-1}$ ) 3716, 3062, 2975, 2314, 1716, 1596, 1456, 1383, 1251, 1213, 1103, 1035, 963, 757, 700. **HRMS** (ESI) Calcd for  $\text{C}_{27}\text{H}_{22}\text{O}_2$  ( $\text{M}+\text{H}$ ) $^+$  379.1693, found 379.1696.

**Methyl 5,7-diphenyl-11H-benzo[*b*]fluorene-10-carboxylate (6g)**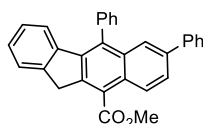

White solid, m. p. = 163-164 °C, yield = 64%;  $^1\text{H NMR}$  (400 MHz,  $\text{CDCl}_3$ )  $\delta$  8.53 (d,  $J = 8.8$  Hz, 1H), 7.81 – 7.75 (m, 2H), 7.58 (q,  $J = 5.7$  Hz, 3H), 7.51 (t,  $J = 8.6$  Hz, 3H), 7.41 – 7.34 (m, 4H), 7.29 (t,  $J = 7.3$  Hz, 1H), 7.23 – 7.17 (m, 1H), 7.01 (t,  $J = 7.6$  Hz, 1H), 6.39 (d,  $J = 7.9$  Hz, 1H), 4.30 (s, 2H), 4.12 (s, 3H).  $^{13}\text{C NMR}$  (100 MHz,  $\text{CDCl}_3$ )  $\delta$  168.86, 144.04, 143.11, 140.97, 140.43, 138.49, 138.28, 137.92, 137.22, 133.55, 129.80, 129.38, 129.14, 128.88, 128.25, 127.62, 127.43, 126.70, 126.28, 125.99, 124.77, 124.67, 123.76, 52.22, 37.73. **IR** (KBr,  $\text{cm}^{-1}$ ) 3713, 3047, 2926, 2858, 2314, 1734, 1594, 1482, 1445, 1251, 1164, 1089, 1013, 958, 832, 755, 696, 617, 501. **HRMS** (ESI) Calcd for  $\text{C}_{31}\text{H}_{22}\text{O}_2$  ( $\text{M}+\text{Na}$ ) $^+$  449.1512, found 449.1512.

**Methyl 9-chloro-5-phenyl-11H-benzo[*b*]fluorene-10-carboxylate (6h)**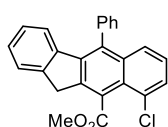

Yellow oil, yield = 66%;  $^1\text{H NMR}$  (400 MHz,  $\text{CDCl}_3$ )  $\delta$  7.63 (t,  $J = 6.6$  Hz, 4H), 7.55 (t,  $J = 6.9$  Hz, 2H), 7.39 (d,  $J = 6.9$  Hz, 2H), 7.30 (d,  $J = 7.6$  Hz, 2H), 7.06 (t,  $J = 7.6$  Hz, 1H), 6.41 (d,  $J = 7.9$  Hz, 1H), 4.15 (d,  $J = 31.8$  Hz, 5H).  $^{13}\text{C NMR}$  (100 MHz,  $\text{CDCl}_3$ )  $\delta$  170.5, 143.7, 141.8, 140.1, 138.2, 137.9, 135.4, 135.0, 129.9, 129.8, 129.3, 128.3, 128.2, 128.0, 126.8, 126.4, 126.1, 125.9, 125.5, 124.9, 123.9, 52.8, 36.0. **IR** (KBr,  $\text{cm}^{-1}$ ) 3726, 3062, 2937, 2314, 1730, 1446, 1251, 1183, 1144, 880, 814, 733, 513. **HRMS** (ESI) Calcd for  $\text{C}_{25}\text{H}_{17}\text{ClO}_2$  ( $\text{M}+\text{H}$ ) $^+$  385.0990, found 385.0989.

**Methyl (E)-5-styryl-11H-benzo[*b*]fluorene-10-carboxylate (6i)**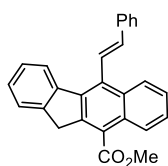

Yellow oil, yield = 70%;  $^1\text{H NMR}$  (400 MHz,  $\text{CDCl}_3$ )  $\delta$  8.44 (d,  $J = 8.3$  Hz, 1H), 8.36 (d,  $J = 8.3$  Hz, 1H), 8.09 (d,  $J = 7.4$  Hz, 1H), 7.76 – 7.68 (m, 3H), 7.59 (d,  $J = 6.6$  Hz, 2H), 7.53 (dd,  $J = 14.6, 7.4$  Hz, 3H), 7.43 (t,  $J = 6.9$  Hz, 1H), 7.36 (dd,  $J = 14.2, 6.9$  Hz, 2H), 6.93 (d,  $J = 16.7$  Hz, 1H), 4.30 (s, 2H), 4.15 (s, 3H).  $^{13}\text{C NMR}$  (100 MHz,  $\text{CDCl}_3$ )  $\delta$  168.9, 144.0, 142.8, 140.9, 137.1, 136.9, 136.8, 133.7, 132.4,

130.0, 129.0, 128.7, 128.3, 128.2, 127.5, 126.9, 126.7, 126.2, 125.7, 125.6, 125.0, 124.9, 124.5, 52.1, 37.6. **IR** (KBr,  $\text{cm}^{-1}$ ) 3441, 2919, 1713, 1643, 1441, 1391, 1213, 1043, 974, 798, 753. **HRMS** (ESI) Calcd for  $\text{C}_{27}\text{H}_{20}\text{O}_2$  ( $\text{M}+\text{H}$ )<sup>+</sup> 377.1536, found 377.1543.

**Methyl 5-(2-methylprop-1-en-1-yl)-11H-benzo[*b*]fluorene-10-carboxylate (6j)**

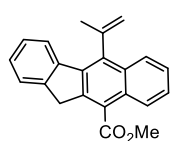

Yellow solid, yield = 70%; **<sup>1</sup>H NMR** (400 MHz,  $\text{CDCl}_3$ )  $\delta$  8.43 (d,  $J$  = 8.2 Hz, 1H), 8.19 (t,  $J$  = 6.7 Hz, 2H), 7.59 (dd,  $J$  = 15.3, 7.3 Hz, 3H), 7.40 (d,  $J$  = 4.1 Hz, 2H), 5.76 (s, 1H), 5.22 (s, 1H), 4.30 (s, 2H), 4.14 (s, 3H), 2.30 (s, 3H). **<sup>13</sup>C NMR** (100 MHz,  $\text{CDCl}_3$ )  $\delta$  168.9, 143.9, 143.1, 142.6, 140.1, 138.6, 135.0, 131.4, 129.9, 129.3, 127.5, 126.9, 126.6, 125.9, 125.8, 125.5, 124.8, 123.9, 117.5, 52.1, 37.4, 24.1. **IR** (KBr,  $\text{cm}^{-1}$ ) 3443, 2954, 1714, 1639, 1438, 1212, 1042, 759. **HRMS** (ESI) Calcd for  $\text{C}_{22}\text{H}_{18}\text{O}_2$  ( $\text{M}+\text{H}$ )<sup>+</sup> 315.1380, found 315.1376.

**1.7 General procedure for the synthesis of 8**

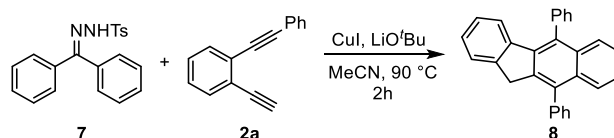

To an acetonitrile (MeCN, 1.0 mL) suspension of CuI (10 mol %) and  $\text{LiO}^t\text{Bu}$  (2eq.) in Schlenk tube with a magnetic bar under nitrogen atmosphere, was added alkyne (**2a**, 0.1 mmol) and N-tosylhydrazones (**7**, 0.15 mmol). The reaction was stirred at 90 °C unless being noted and monitored by TLC. After accomplished, the reaction mixture was purified by chromatography with petroleum/ethyl acetate(v/v: 20/1) to obtain **8**.

The characterization data of **8** was consistent with literature.<sup>[6]</sup>

**5,10-Diphenyl-11H-benzo[*b*]fluorene (8)**

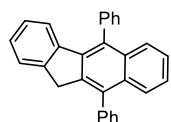

White solid, yield = 53%; **<sup>1</sup>H NMR** (400 MHz,  $\text{CDCl}_3$ )  $\delta$  7.68 – 7.54 (m, 7H), 7.50 (d,  $J$  = 9.2 Hz, 5H), 7.42 – 7.33 (m, 3H), 7.19 (s, 1H), 7.02 (t,  $J$  = 7.5 Hz, 1H), 6.50 (d,  $J$  = 7.9 Hz, 1H), 3.87 (s, 2H). **<sup>13</sup>C NMR** (100 MHz,  $\text{CDCl}_3$ )  $\delta$  144.3, 141.5, 139.5, 139.3, 139.2, 137.0, 135.3, 133.2, 133.0, 131.6, 130.2, 130.0, 129.2, 128.7, 127.8, 127.4, 127.1, 126.5, 126.5, 125.8, 125.3, 125.1, 124.8, 123.8, 36.6.

**2. References**

- [1] H. Luo, K. Chen, H. Jiang and S. Zhu, *Org. Lett.*, 2016, **18**, 5208.
- [2] Y. Yang, J.-X. Yu, X.-H. Ouyang, and J.-H. Li, *Org. Lett.*, 2017, **19**, 3982.
- [3] E. Rettenmeier, M. M. Hansmann, A. Ahrens, K. R benacker, T. Saboo, J. Massholder, C. Meier, M. Rudolph, F. Rominger and A. Stephen K. Hashmi, *Chem. Eur.J.*, 2015, **21**, 14401.
- [4] A. Stephen K. Hashmi, M. Wietek, I. Braun, P. N çsel, L. Jongbloed and M. Rudolph, F. Romingera, *Adv. Synth. Catal.*, 2012, **354**, 555.
- [5] D. Li, Y. Wei and M. Shi, *Chem. Eur. J.*, 2013, **19**, 15682.
- [6] K. Wang, H. Zhang and J. L. Petersen, *J. Org. Chem.*, 1999, **64**, 1650.

### 3. X-Ray diffraction analysis

#### 3.1 Crystal data and structure refinement for 3am

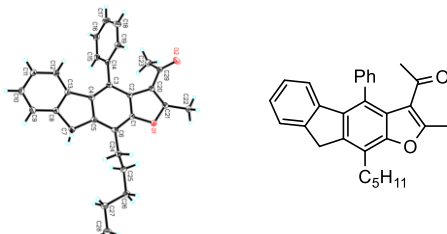

|                                      |                                                               |
|--------------------------------------|---------------------------------------------------------------|
| CCDC number                          | 1888277                                                       |
| Identification code                  | <b>3am</b>                                                    |
| Empirical formula                    | C <sub>29</sub> H <sub>28</sub> O <sub>2</sub>                |
| Formula weight                       | 408.51                                                        |
| Temperature/K                        | 100.00(10)                                                    |
| Crystal system                       | triclinic                                                     |
| Space group                          | P-1                                                           |
| a/Å                                  | 10.2239(5)                                                    |
| b/Å                                  | 11.0090(6)                                                    |
| c/Å                                  | 11.0538(6)                                                    |
| α/°                                  | 73.729(5)                                                     |
| β/°                                  | 86.050(5)                                                     |
| γ/°                                  | 65.798(5)                                                     |
| Volume/Å <sup>3</sup>                | 1087.85(11)                                                   |
| Z                                    | 2                                                             |
| ρ <sub>calc</sub> /g/cm <sup>3</sup> | 1.247                                                         |
| μ/mm <sup>-1</sup>                   | 0.076                                                         |
| F(000)                               | 436.0                                                         |
| Crystal size/mm <sup>3</sup>         | 0.13 × 0.12 × 0.11                                            |
| Radiation                            | MoKα (λ = 0.71073)                                            |
| 2θ range for data collection/°       | 4.222 to 49.99                                                |
| Index ranges                         | -12 ≤ h ≤ 12, -13 ≤ k ≤ 12, -13 ≤ l ≤ 12                      |
| Reflections collected                | 11241                                                         |
| Independent reflections              | 3818 [R <sub>int</sub> = 0.0404, R <sub>sigma</sub> = 0.0473] |
| Data/restraints/parameters           | 3818/0/292                                                    |
| Goodness-of-fit on F <sup>2</sup>    | 1.043                                                         |
| Final R indexes [I ≥ 2σ (I)]         | R <sub>1</sub> = 0.0458, wR <sub>2</sub> = 0.1096             |
| Final R indexes [all data]           | R <sub>1</sub> = 0.0577, wR <sub>2</sub> = 0.1198             |



Largest diff. peak/hole / e Å<sup>-3</sup> 0.23/-0.18

### 3.2 Crystal data and structure refinement for 6d

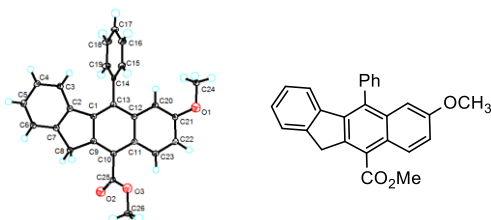

|                                             |                                                               |
|---------------------------------------------|---------------------------------------------------------------|
| CCDC number                                 | 1888278                                                       |
| Identification code                         | <b>6d</b>                                                     |
| Empirical formula                           | C <sub>26</sub> H <sub>20</sub> O <sub>3</sub>                |
| Formula weight                              | 380.42                                                        |
| Temperature/K                               | 100.01(10)                                                    |
| Crystal system                              | Monoclinic                                                    |
| Space group                                 | P2 <sub>1</sub> /n                                            |
| a/Å                                         | 11.5269(6)                                                    |
| b/Å                                         | 6.9766(4)                                                     |
| c/Å                                         | 23.8120(12)                                                   |
| α/°                                         | 90                                                            |
| β/°                                         | 98.369(5)                                                     |
| γ/°                                         | 90                                                            |
| Volume/Å <sup>3</sup>                       | 1894.54(18)                                                   |
| Z                                           | 4                                                             |
| ρ <sub>calc</sub> /g/cm <sup>3</sup>        | 1.334                                                         |
| μ/mm <sup>-1</sup>                          | 0.086                                                         |
| F(000)                                      | 800.0                                                         |
| Crystal size/mm <sup>3</sup>                | 0.13 × 0.12 × 0.11                                            |
| Radiation                                   | Mo Kα (λ = 0.71073)                                           |
| 2θ range for data collection/°              | 4.188 to 50                                                   |
| Index ranges                                | -13 ≤ h ≤ 13, -6 ≤ k ≤ 8, -26 ≤ l ≤ 28                        |
| Reflections collected                       | 11699                                                         |
| Independent reflections                     | 3333 [R <sub>int</sub> = 0.0287, R <sub>sigma</sub> = 0.0290] |
| Data/restraints/parameters                  | 3333/0/273                                                    |
| Goodness-of-fit on F <sup>2</sup>           | 1.084                                                         |
| Final R indexes [I >= 2σ (I)]               | R <sub>1</sub> = 0.0398, wR <sub>2</sub> = 0.0945             |
| Final R indexes [all data]                  | R <sub>1</sub> = 0.0474, wR <sub>2</sub> = 0.0991             |
| Largest diff. peak/hole / e Å <sup>-3</sup> | 0.20/-0.17                                                    |

#### 4. Copies of NMR spectra

2i

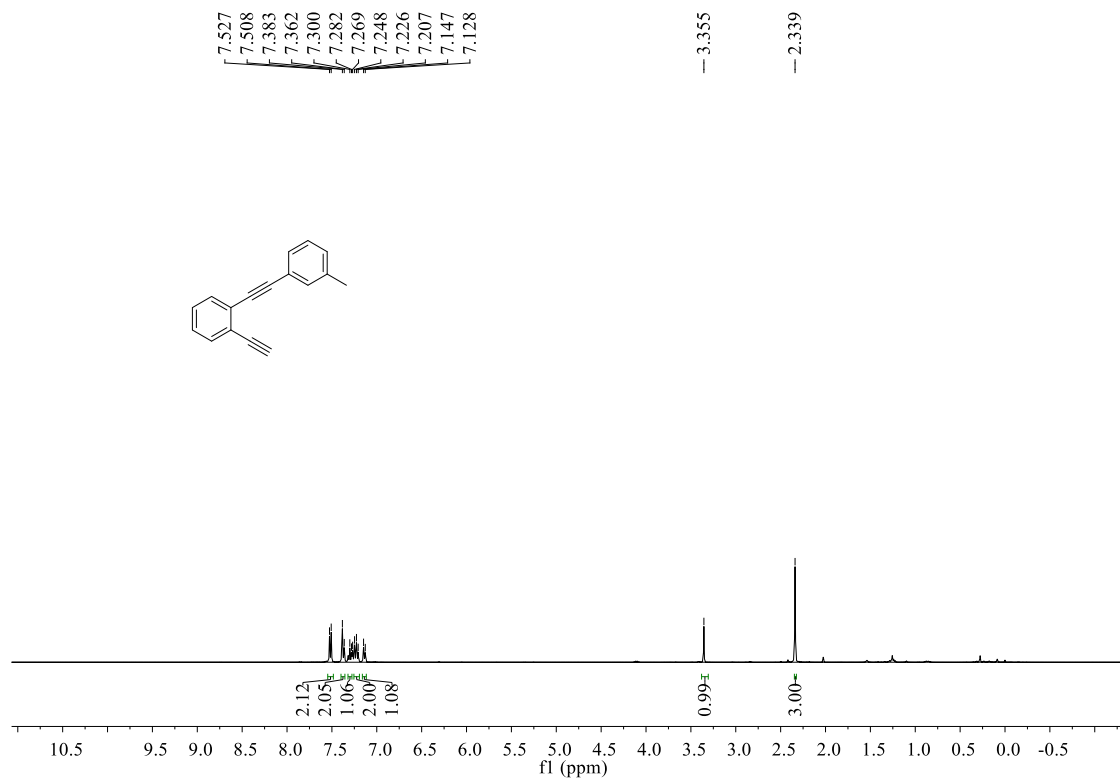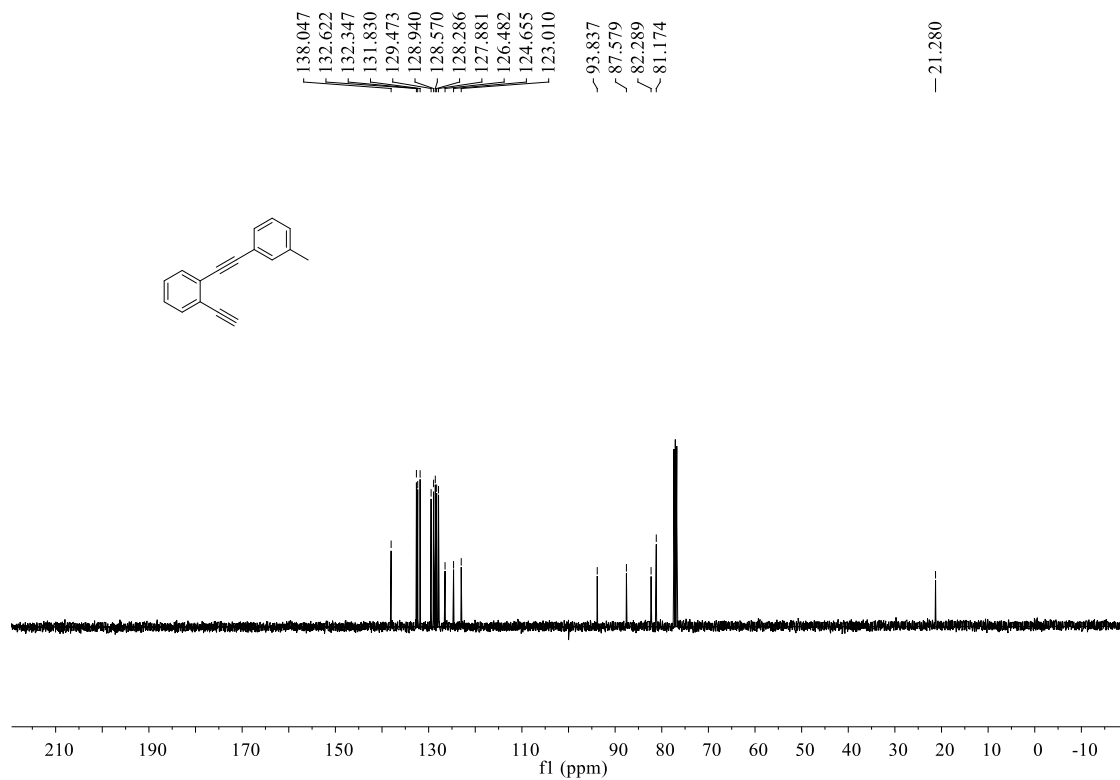

2k

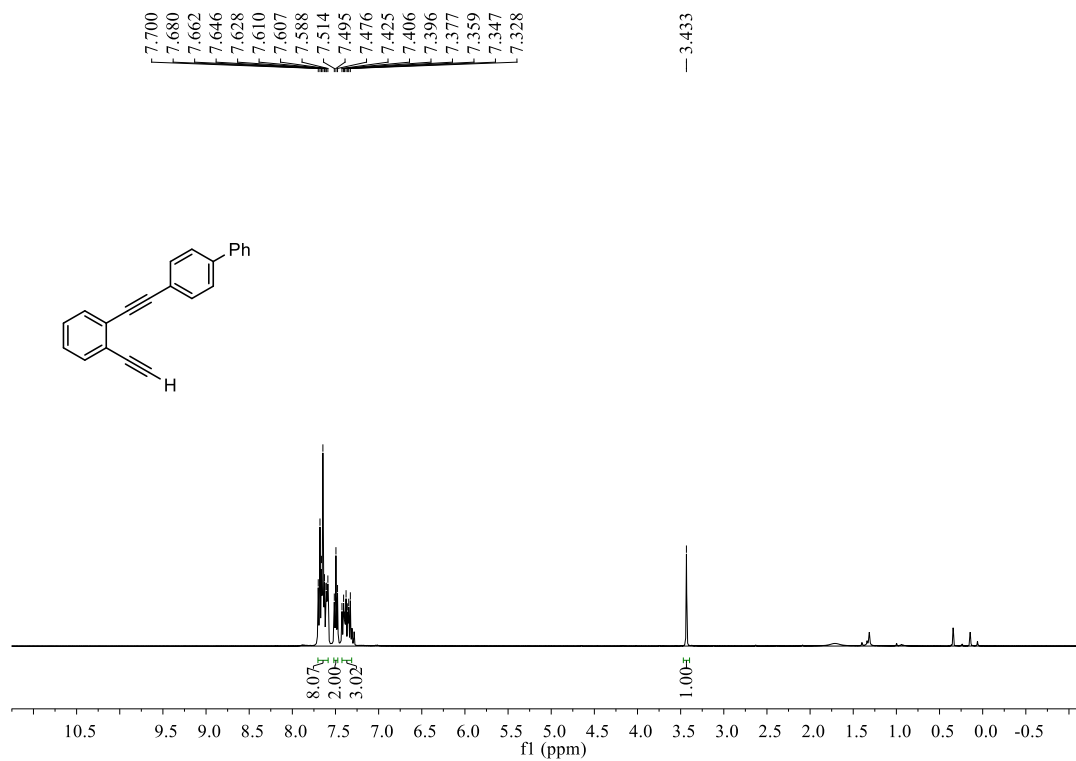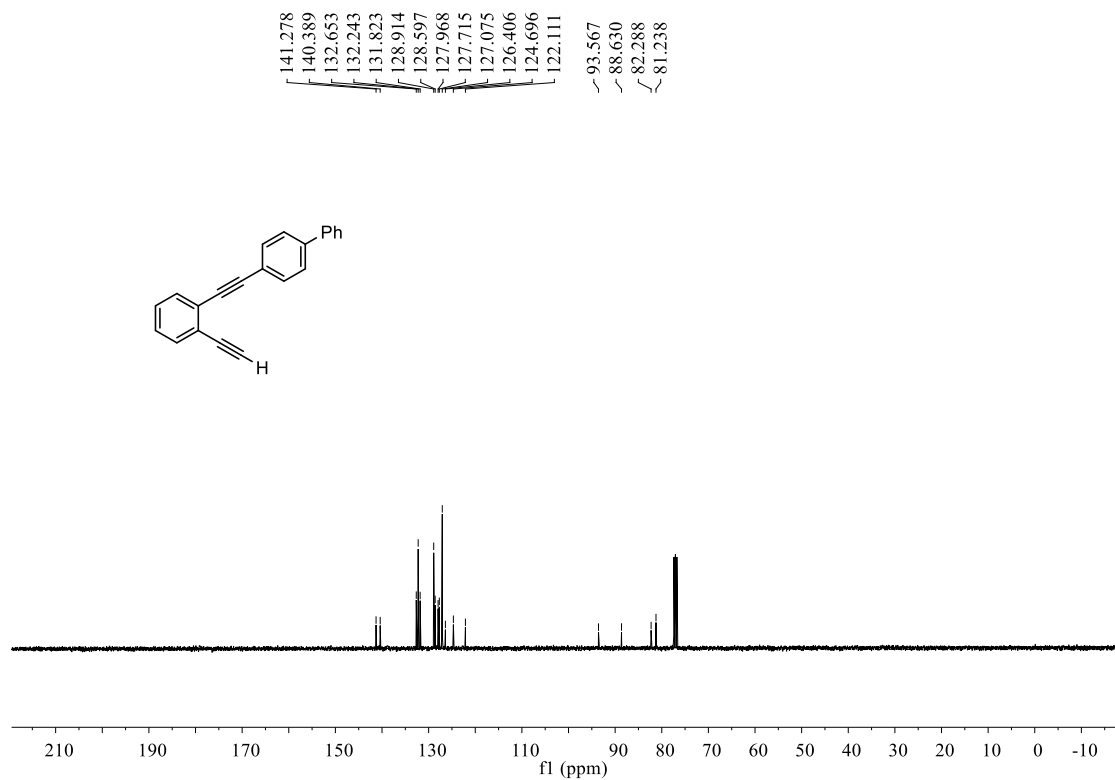

2l

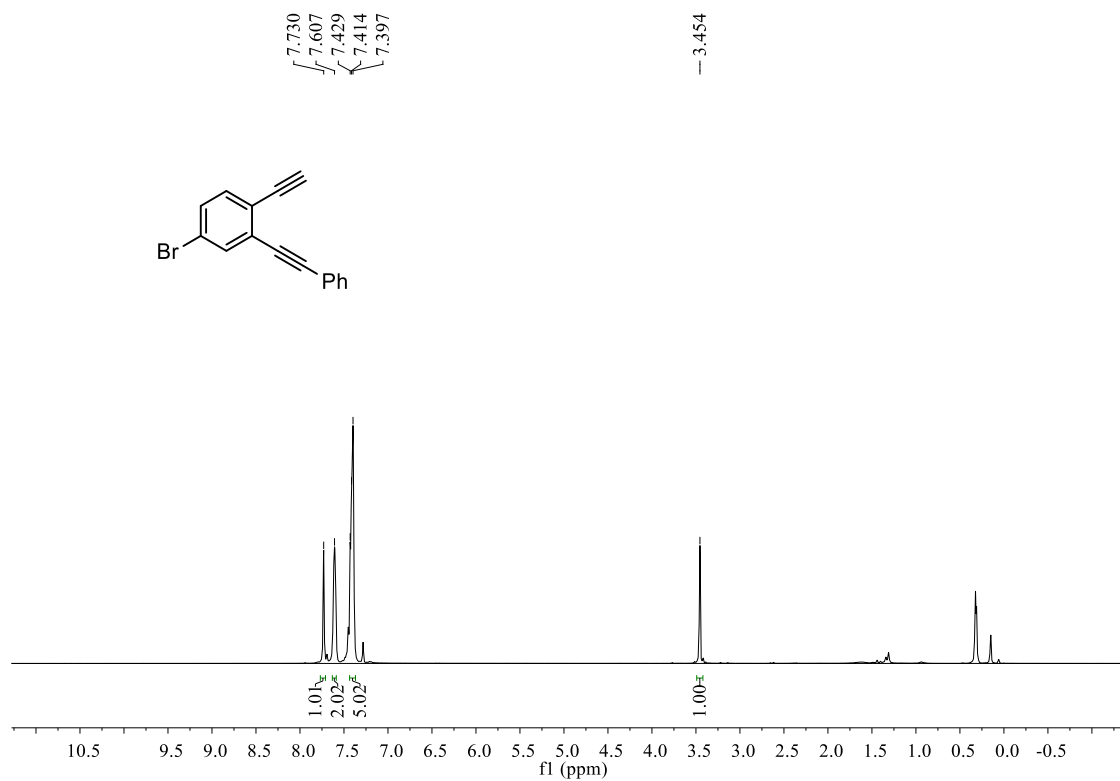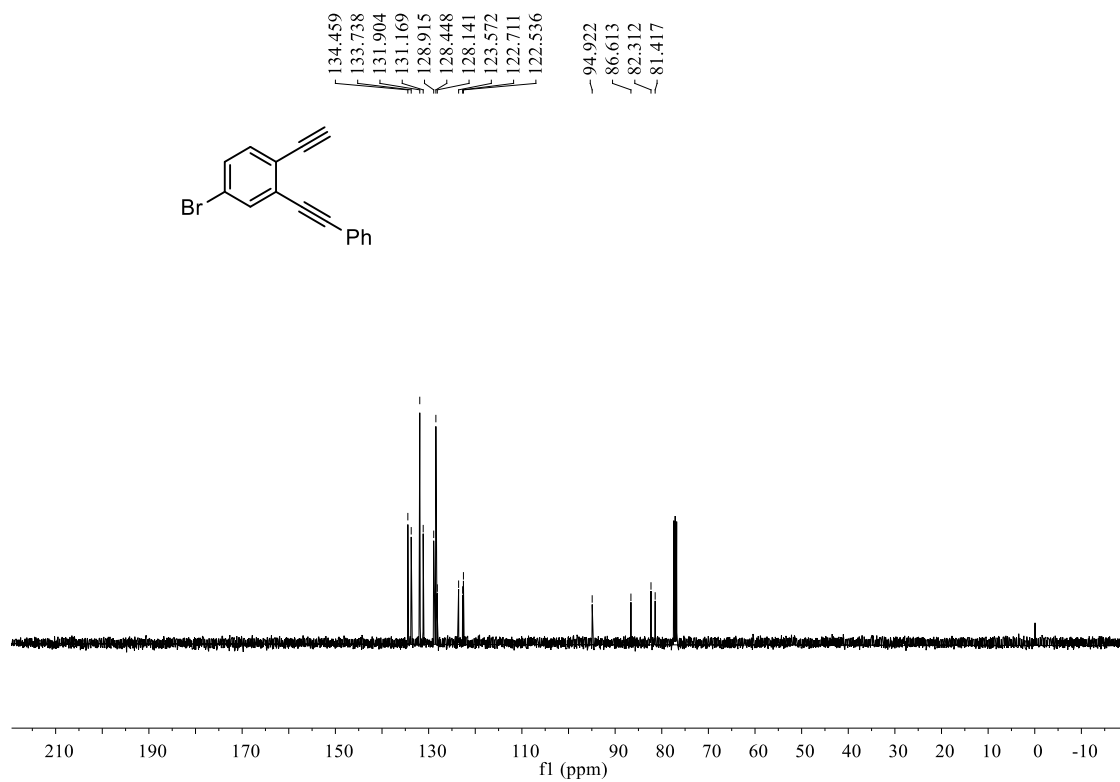

2m

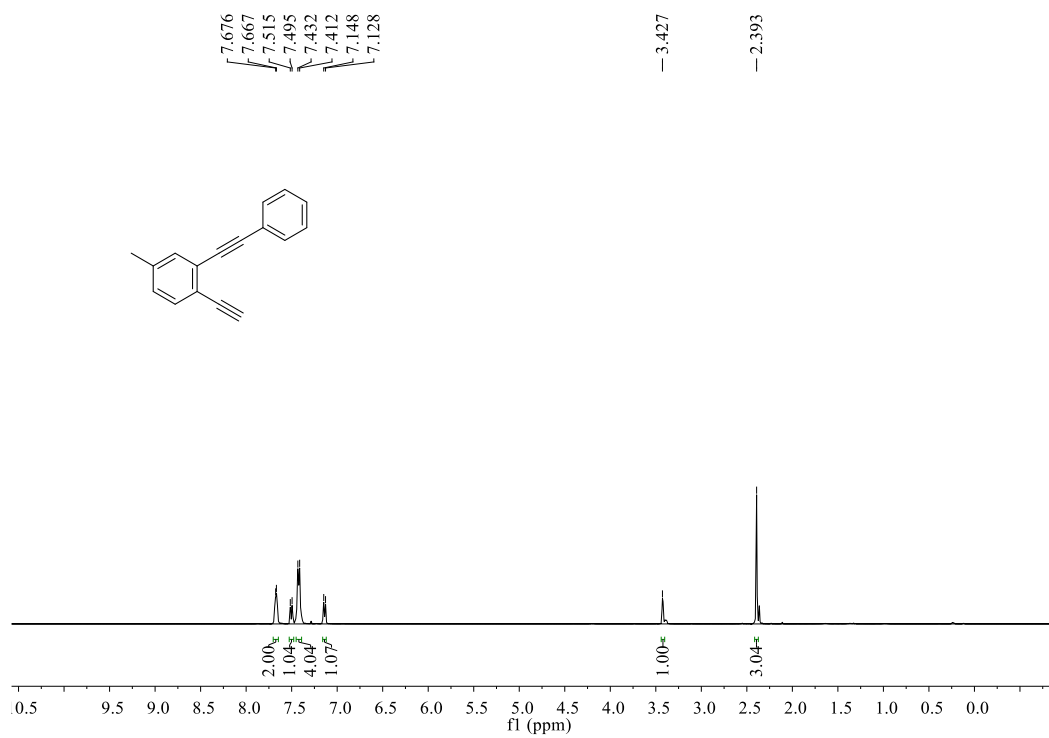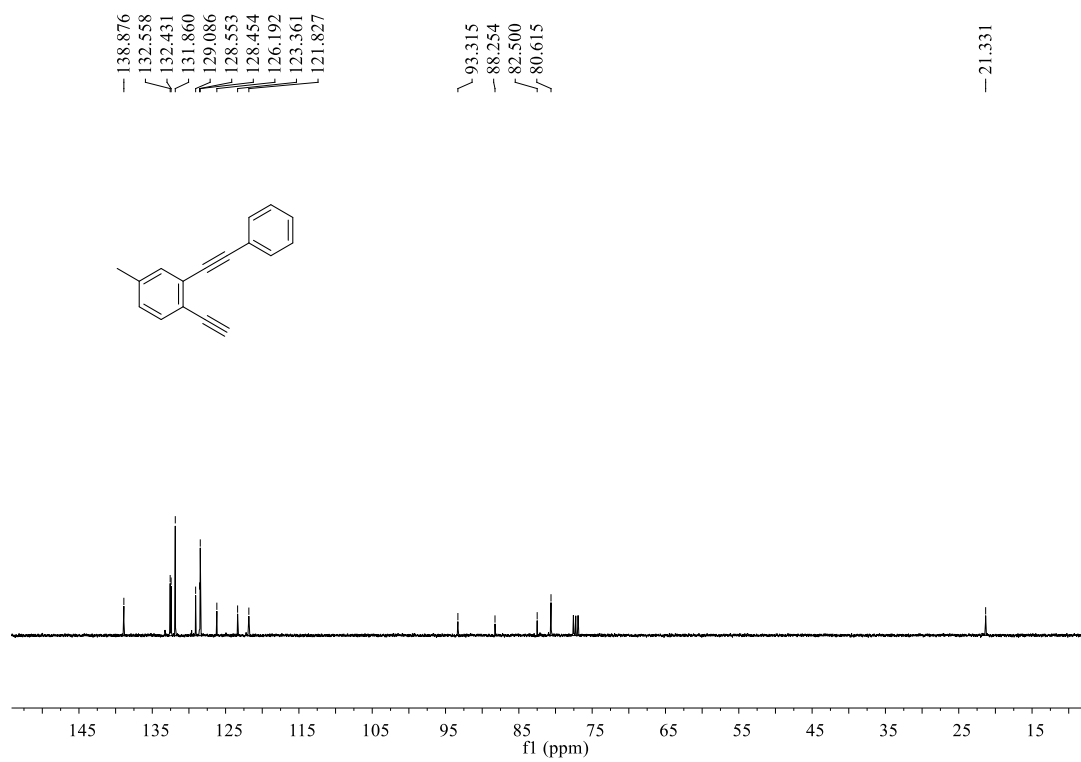

2n(E/Z = 5:1)

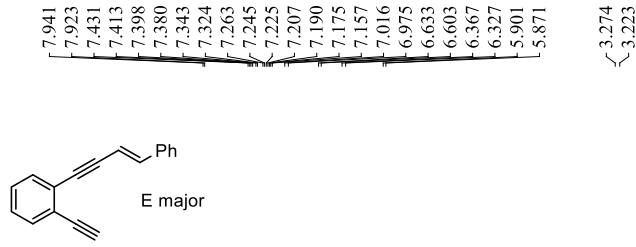

7.941  
7.923  
7.431  
7.413  
7.398  
7.380  
7.343  
7.324  
7.263  
7.245  
7.225  
7.207  
7.190  
7.175  
7.157  
7.016  
6.975  
6.633  
6.603  
6.367  
6.327  
5.901  
5.871  
3.274  
3.223

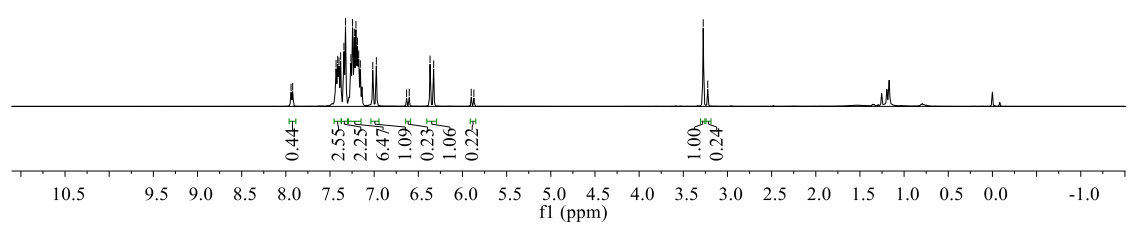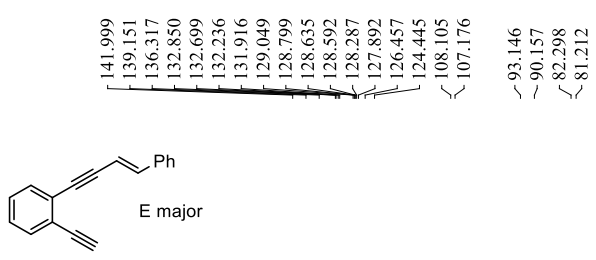

141.999  
139.151  
136.317  
132.850  
132.699  
132.236  
131.916  
129.049  
128.799  
128.635  
128.592  
128.287  
127.892  
126.457  
124.445  
108.105  
107.176  
93.146  
90.157  
82.298  
81.212

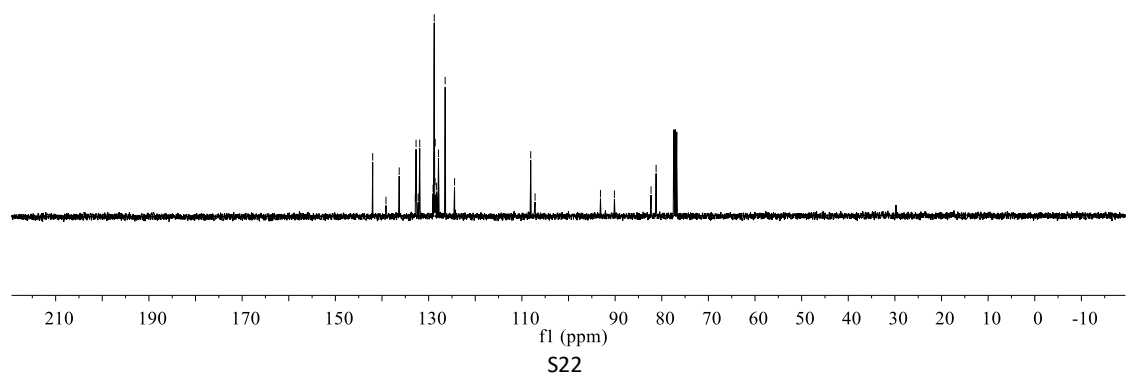

3aa

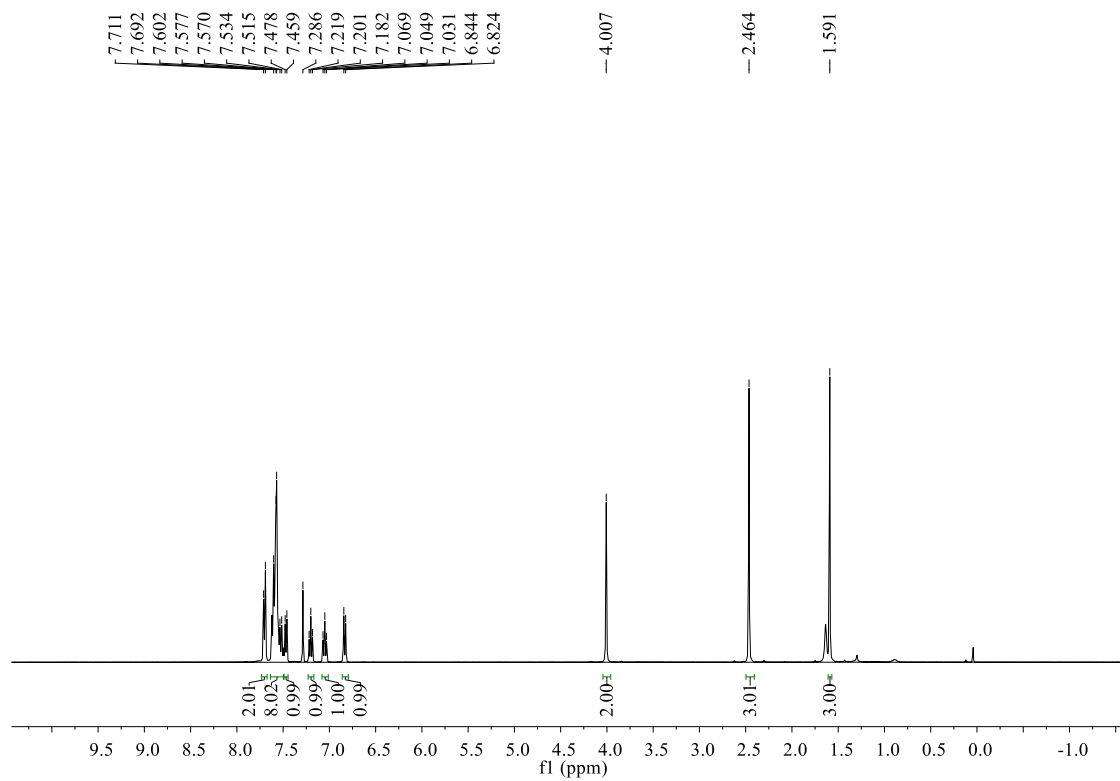

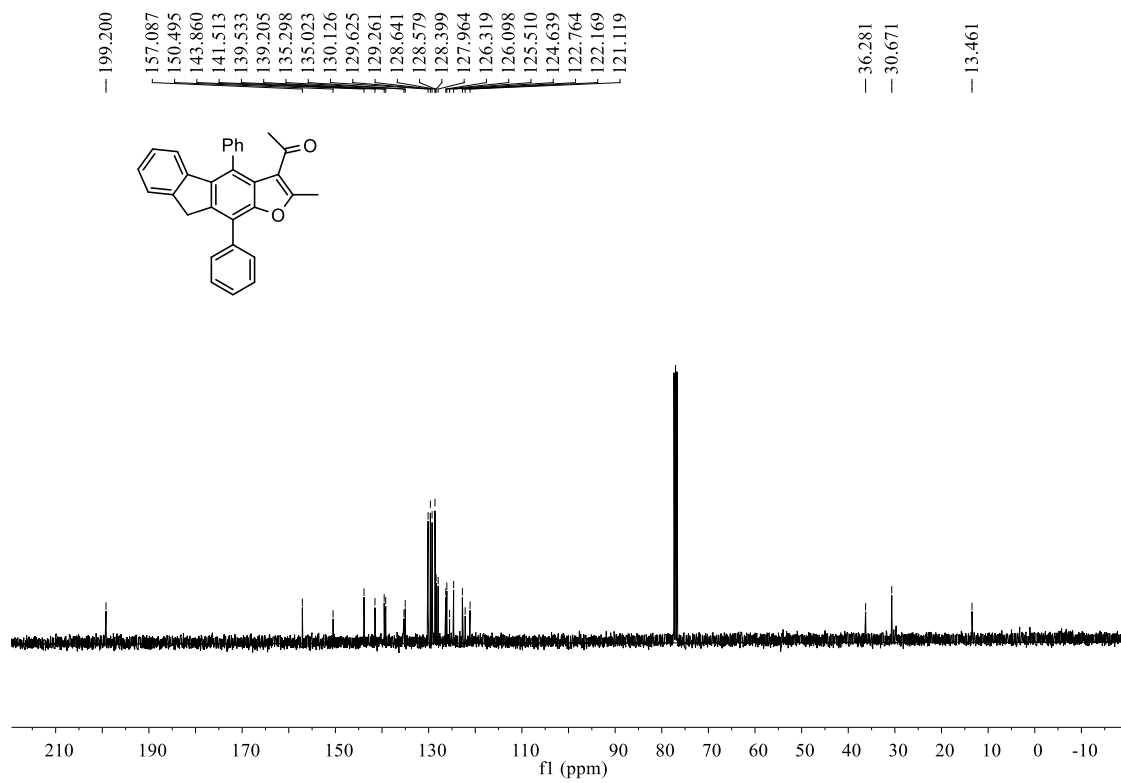

**7aa**



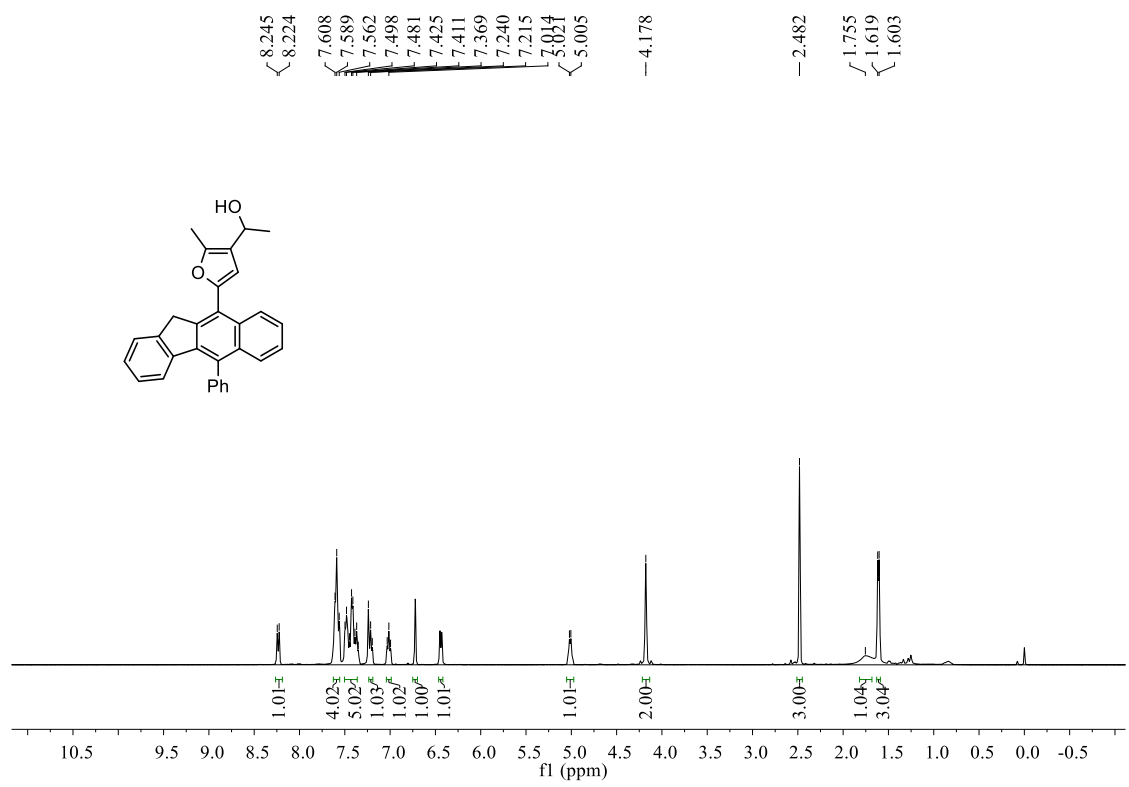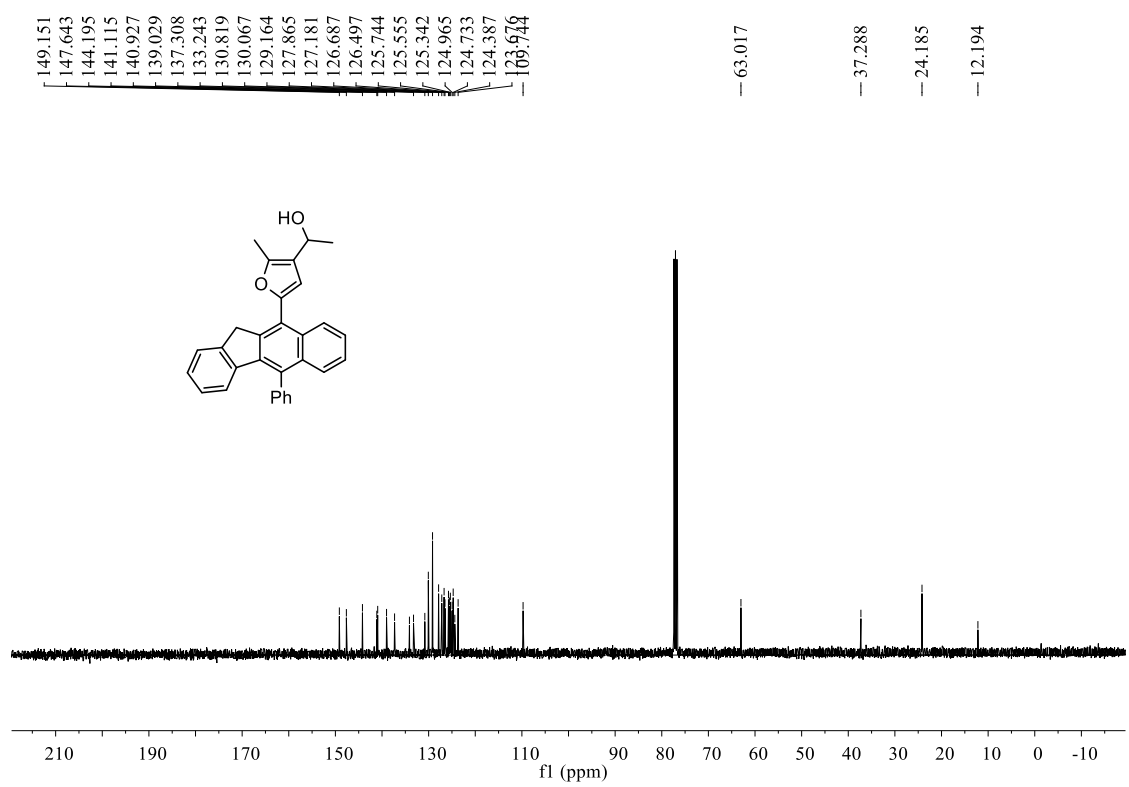

**3ab**

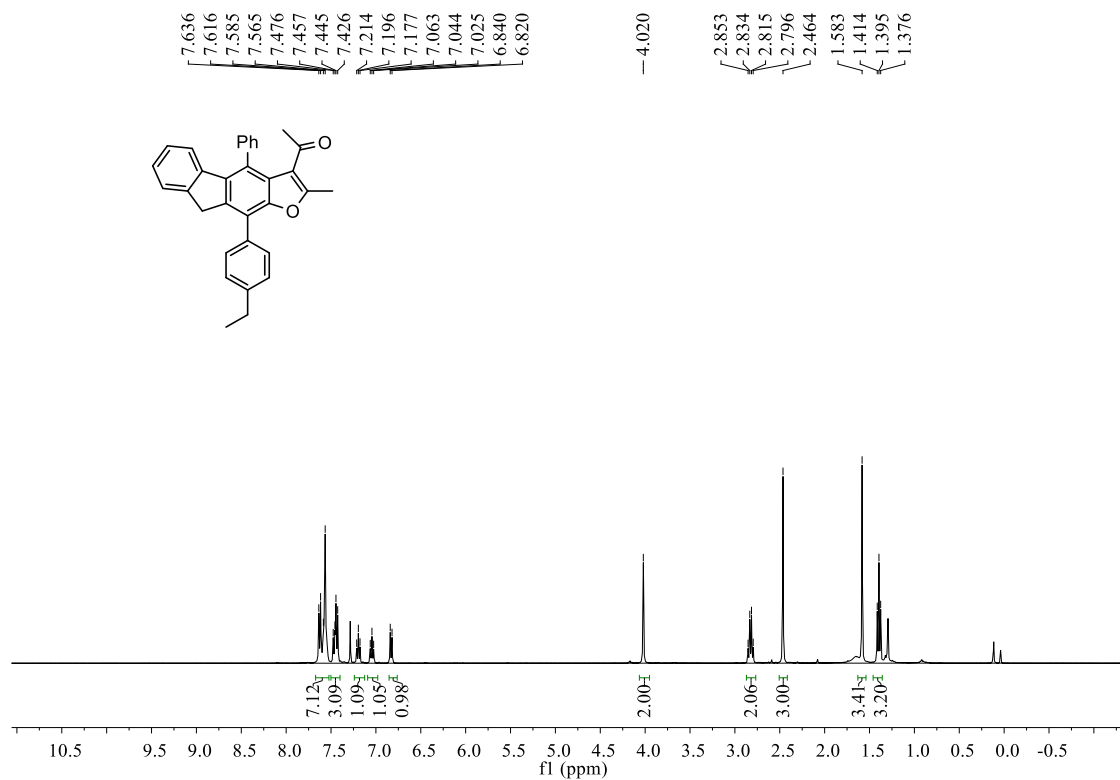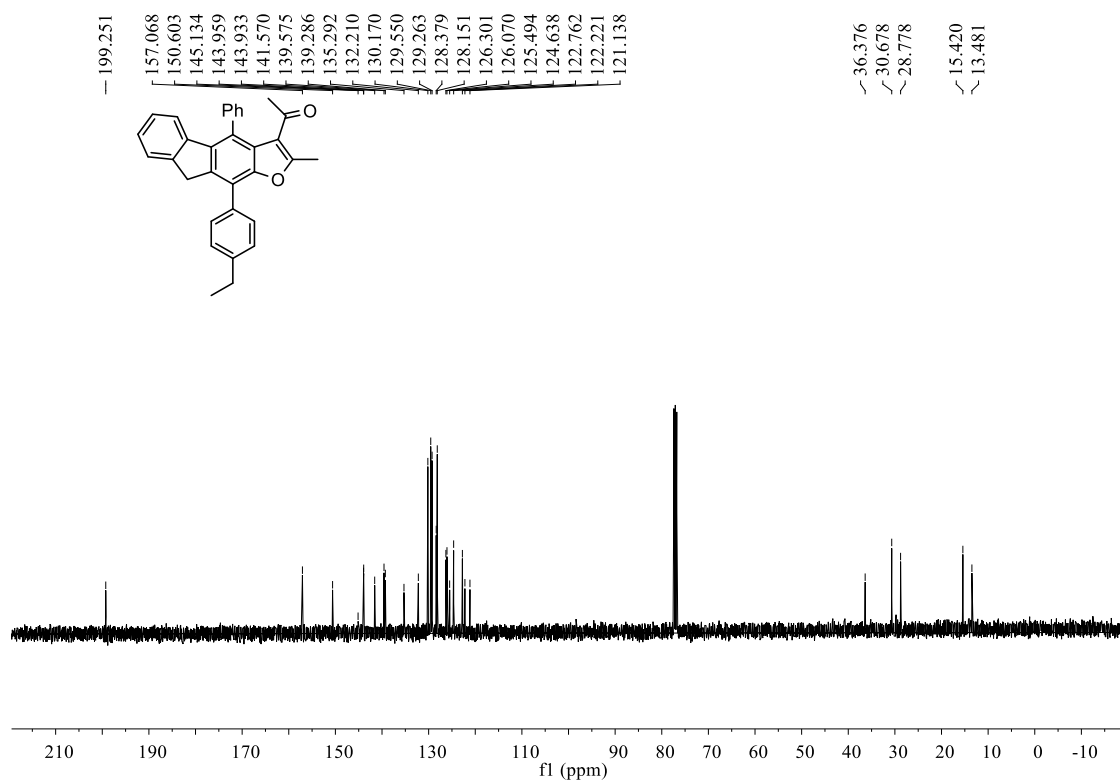

**3ac**

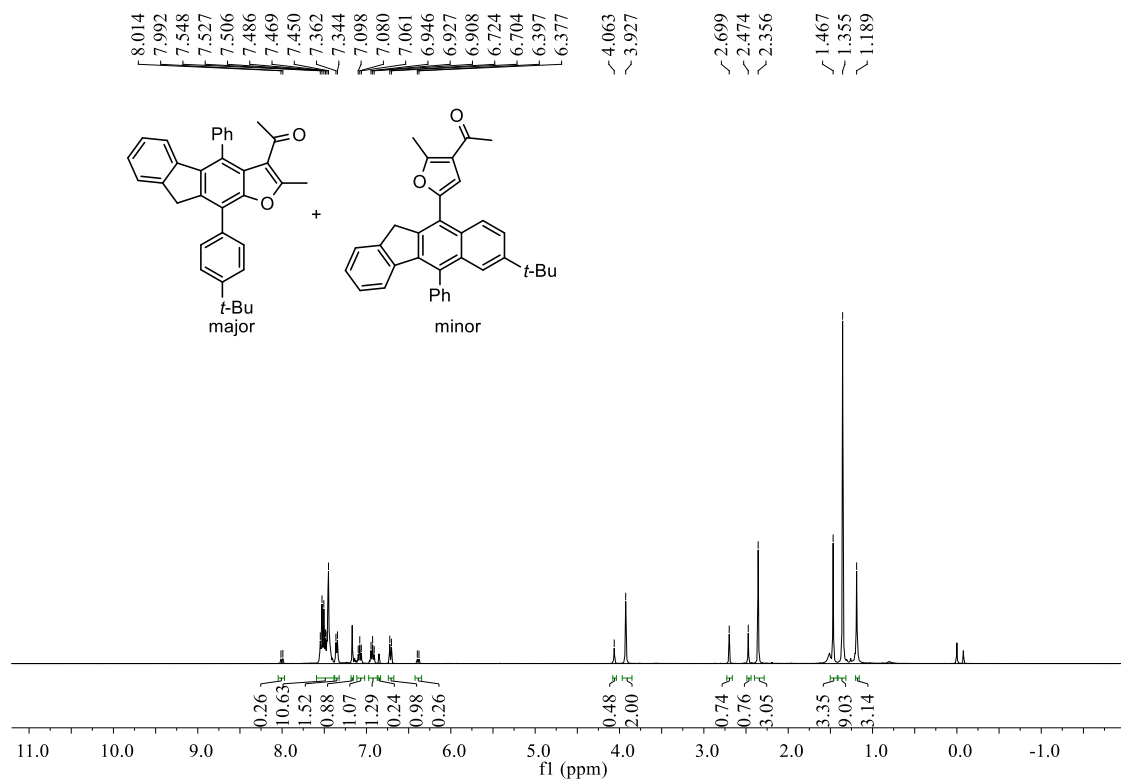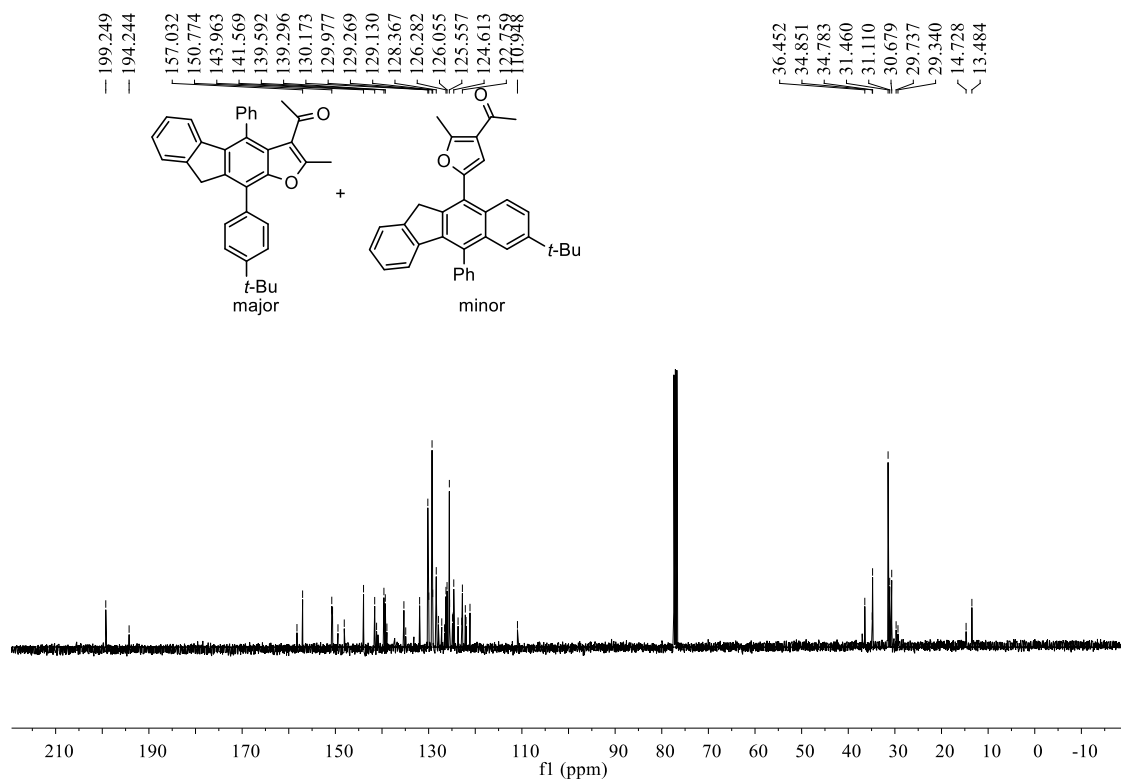

**3ad**

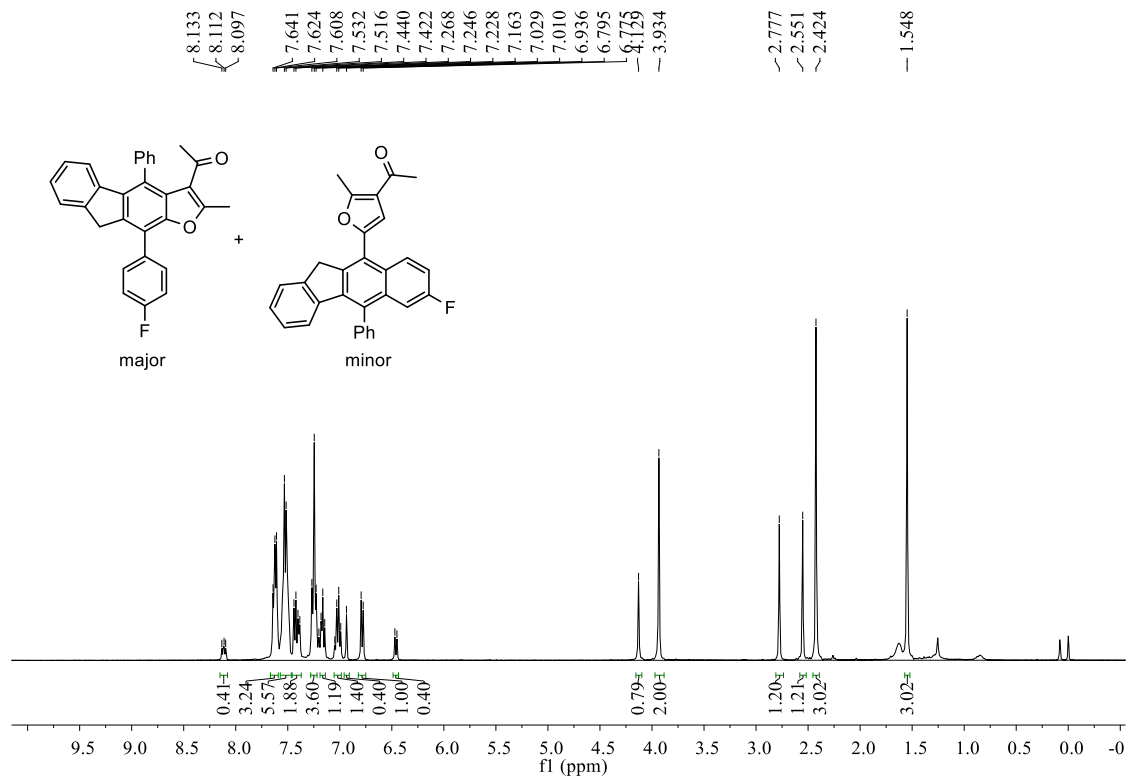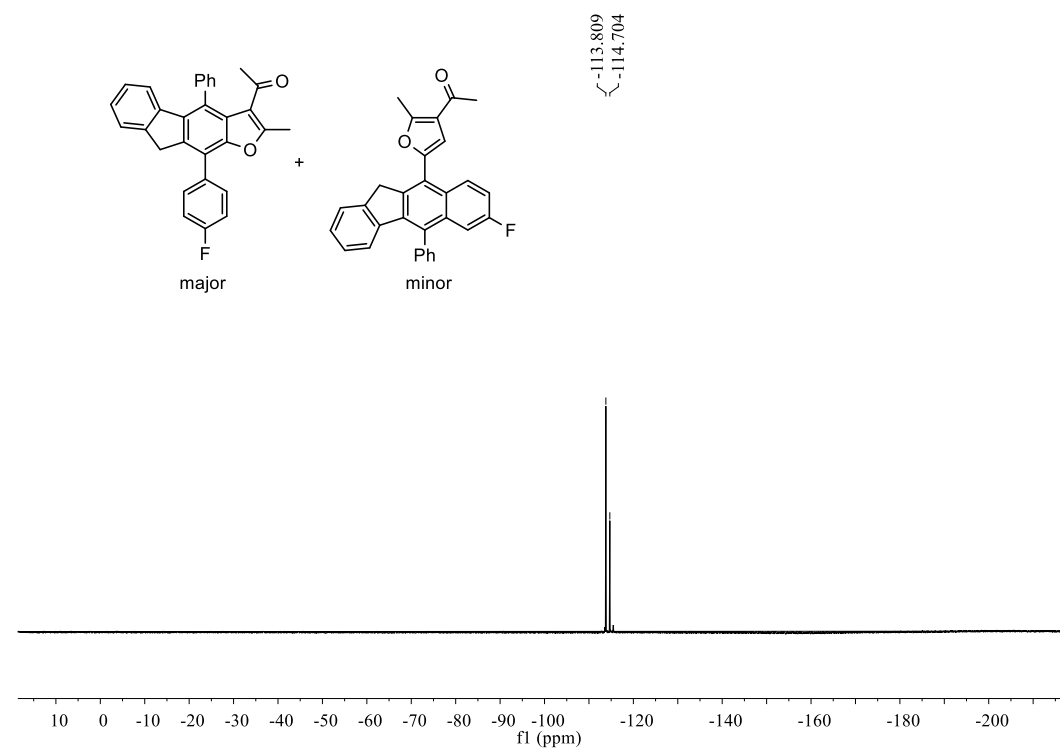

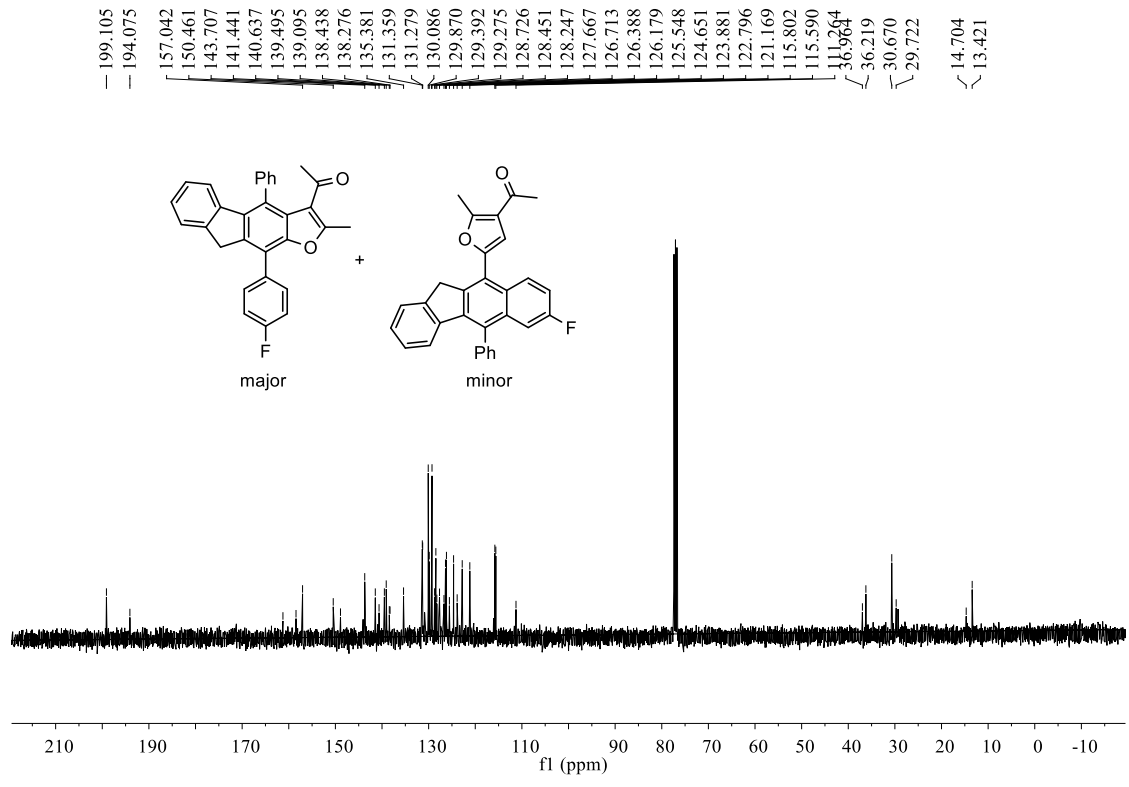

3ae

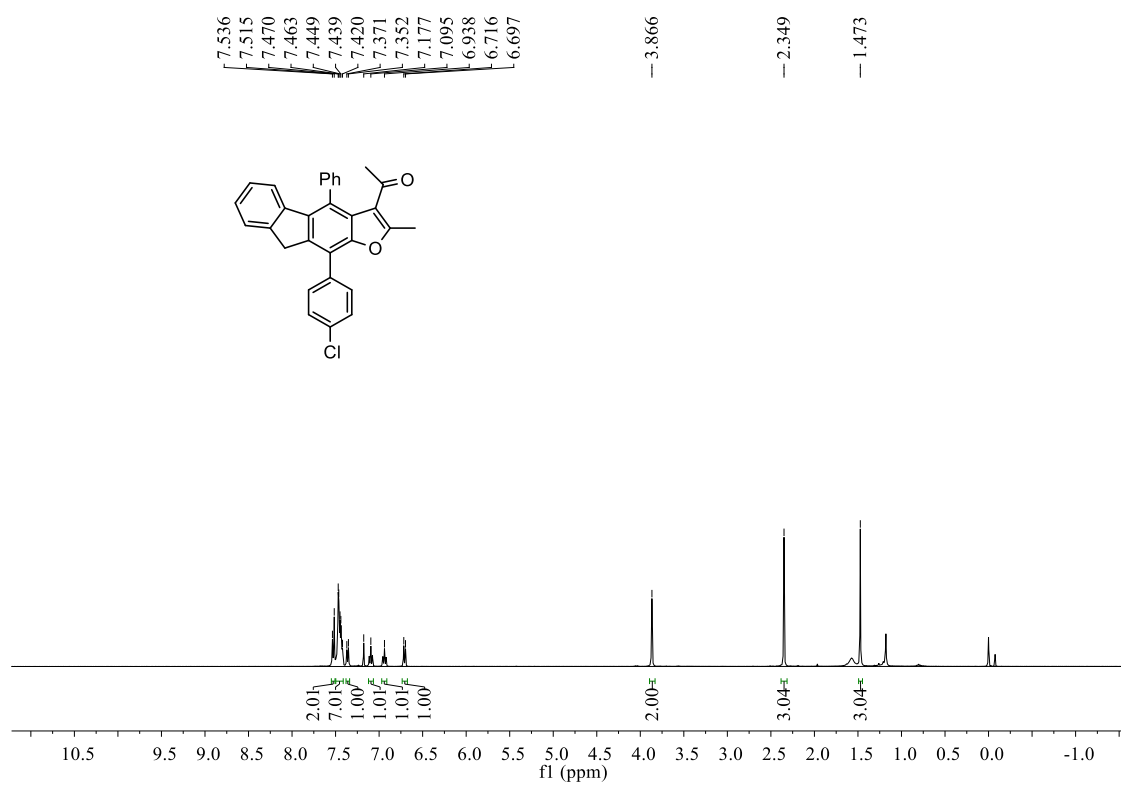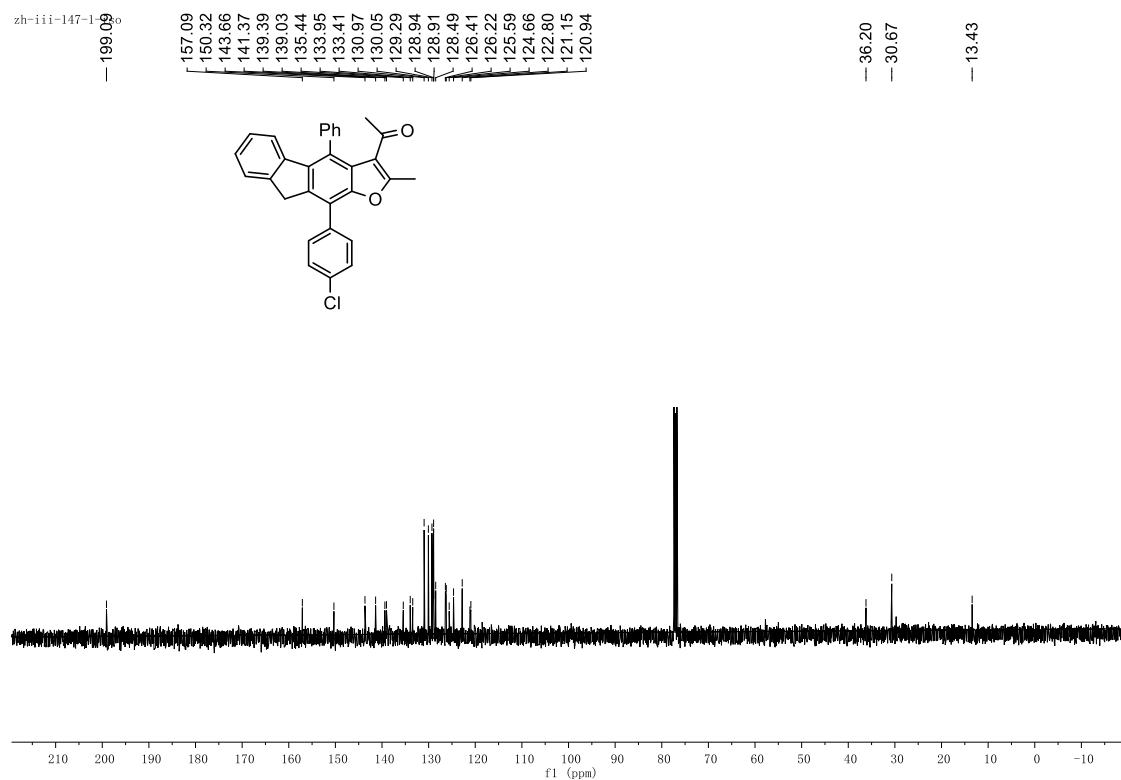

3af

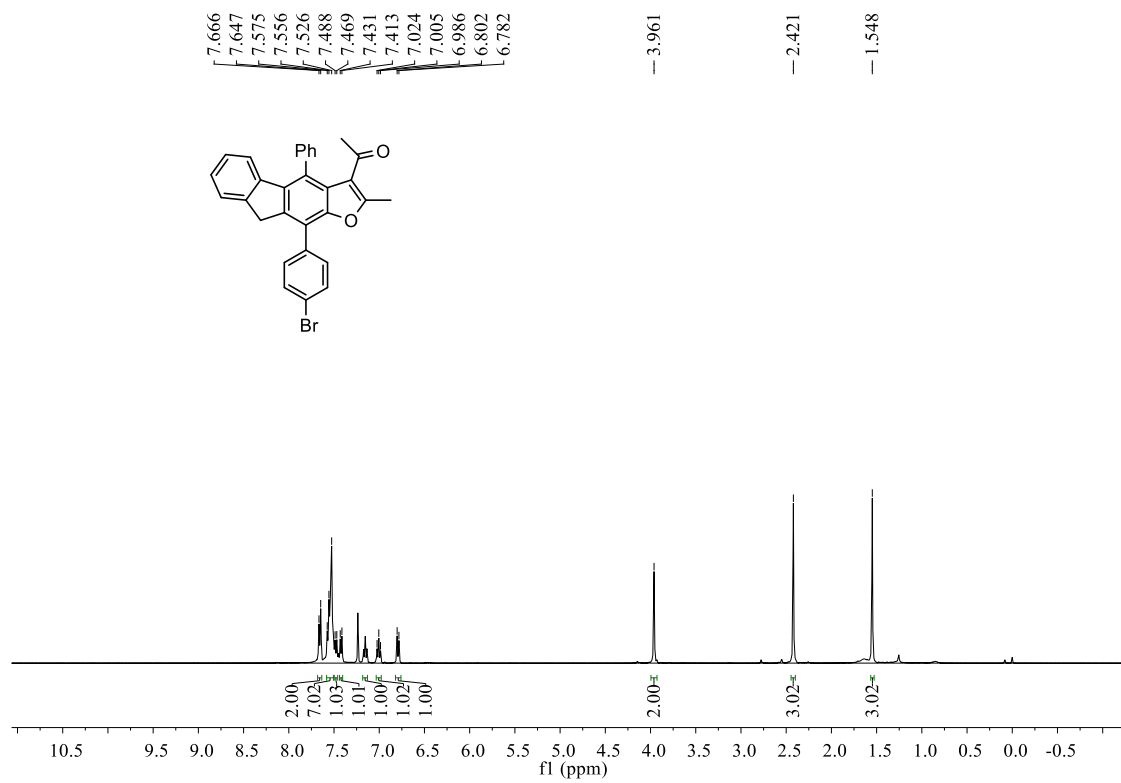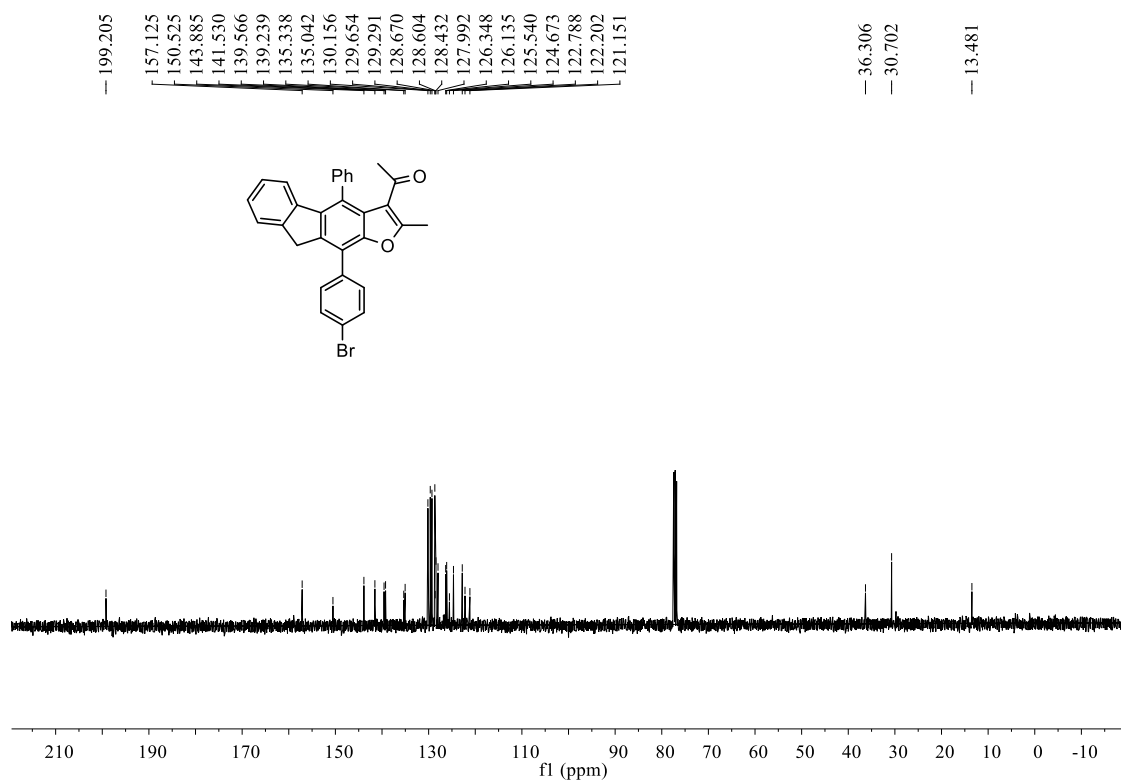

**3ag**

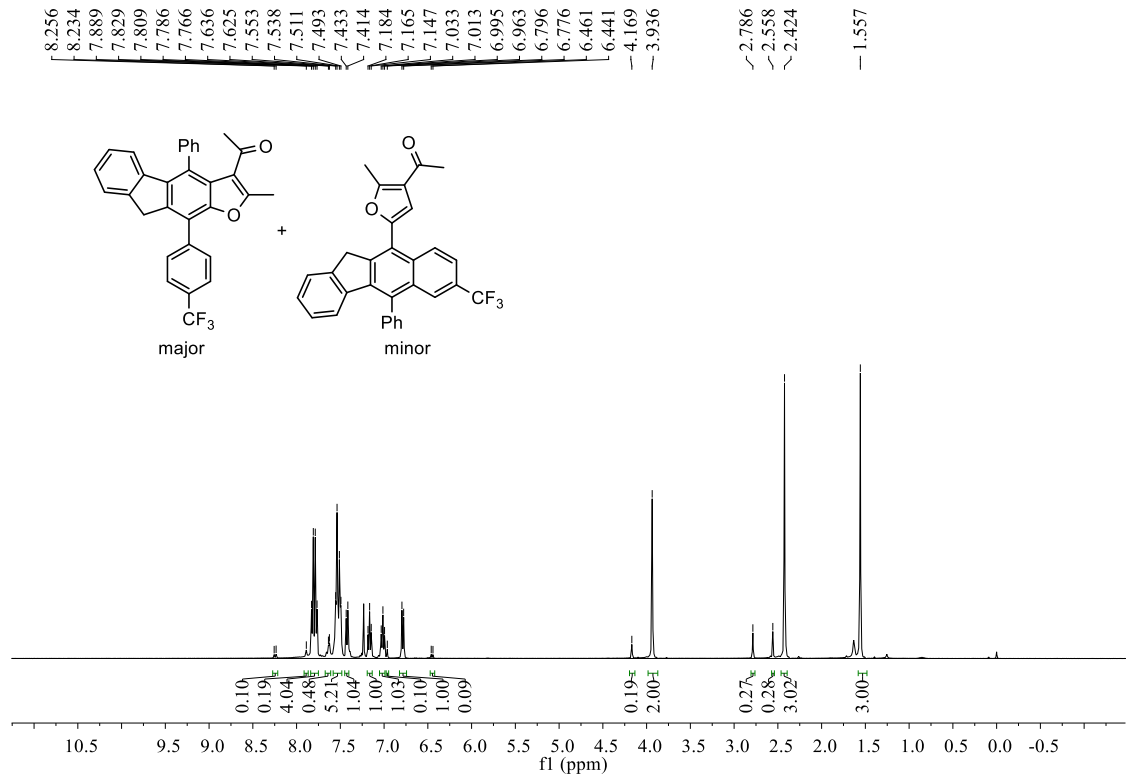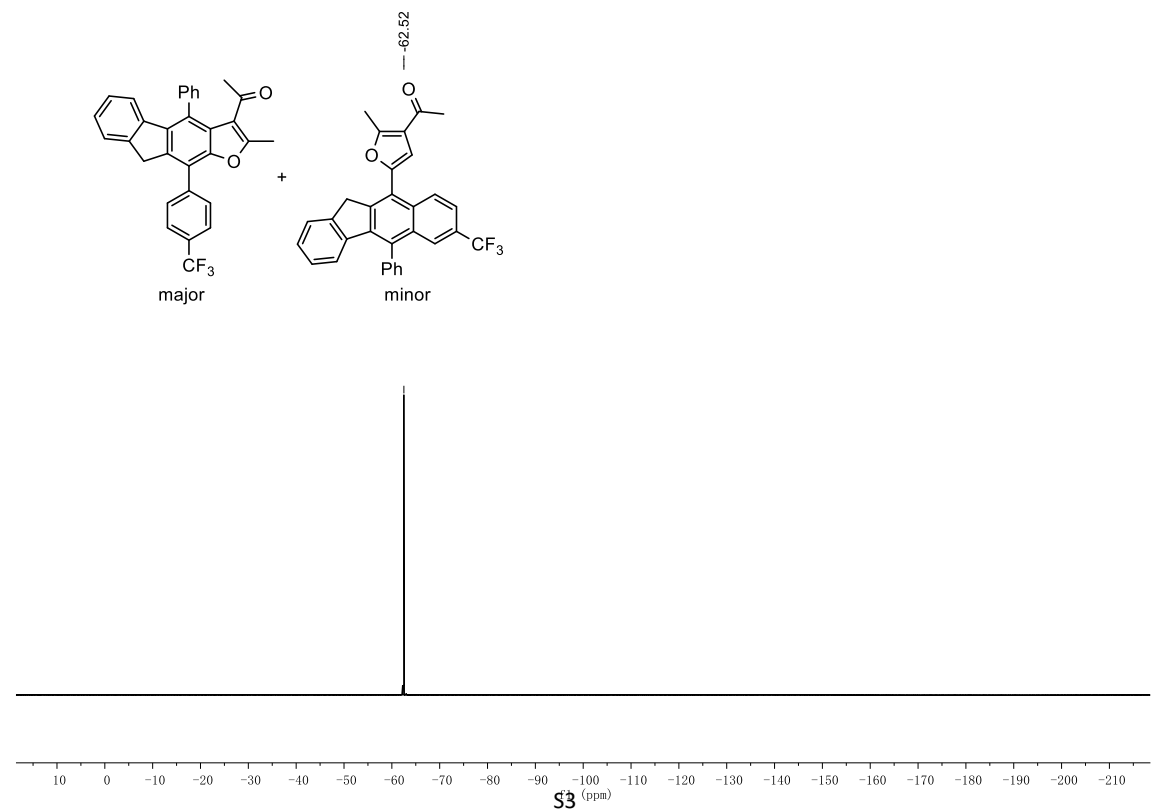



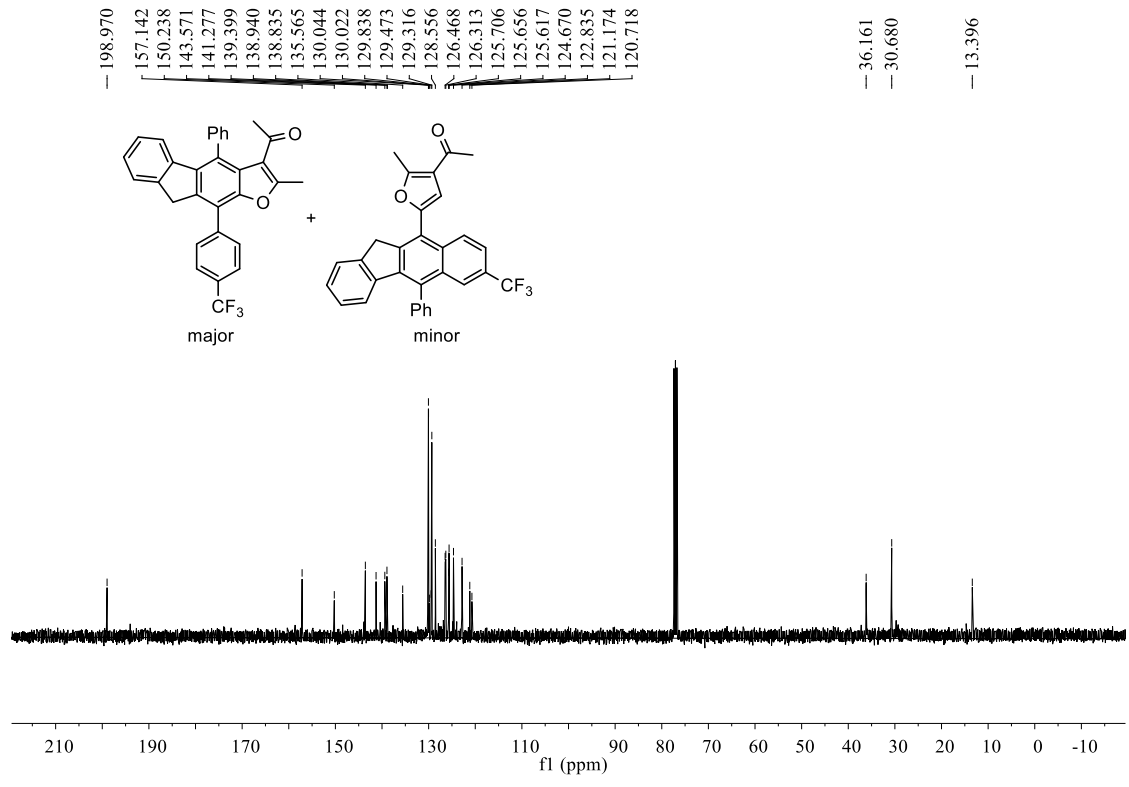

3ah

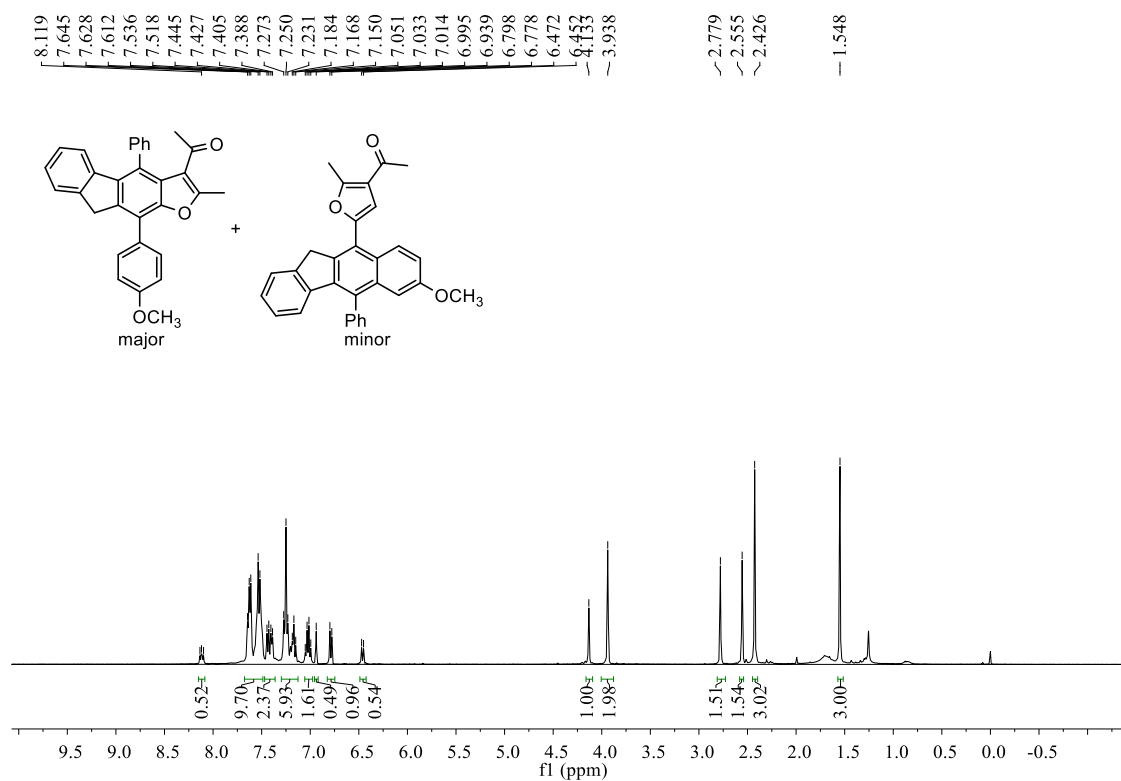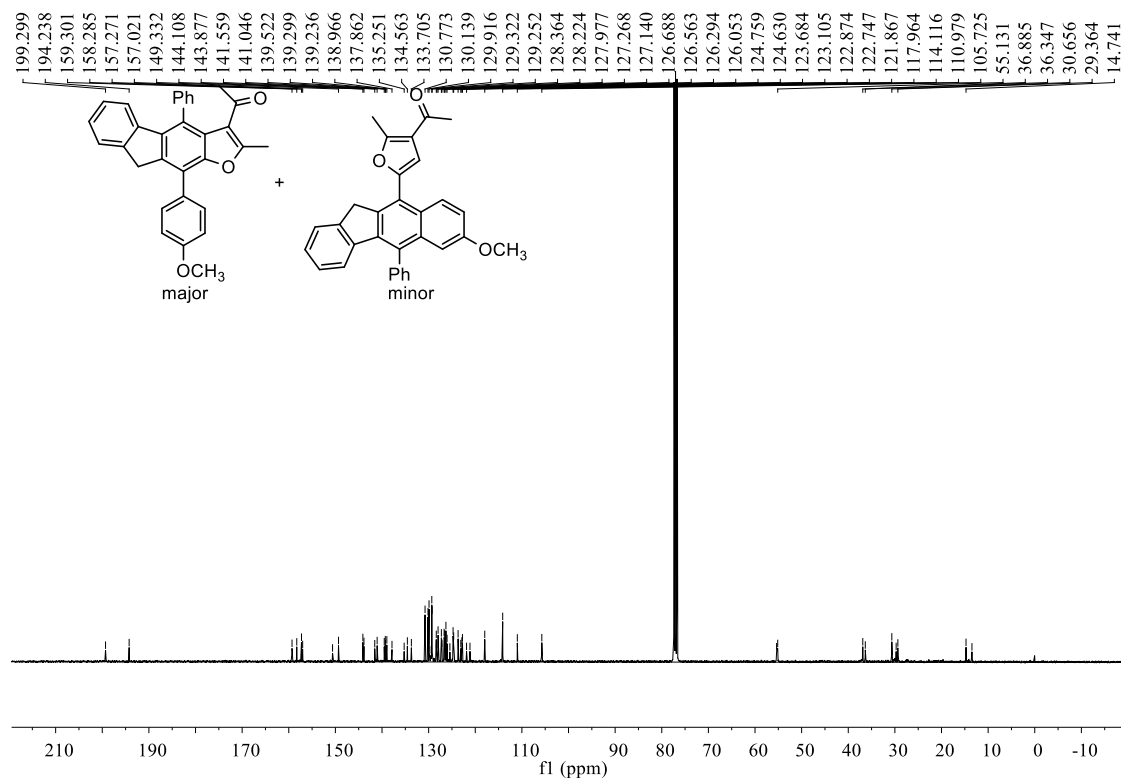

3ai

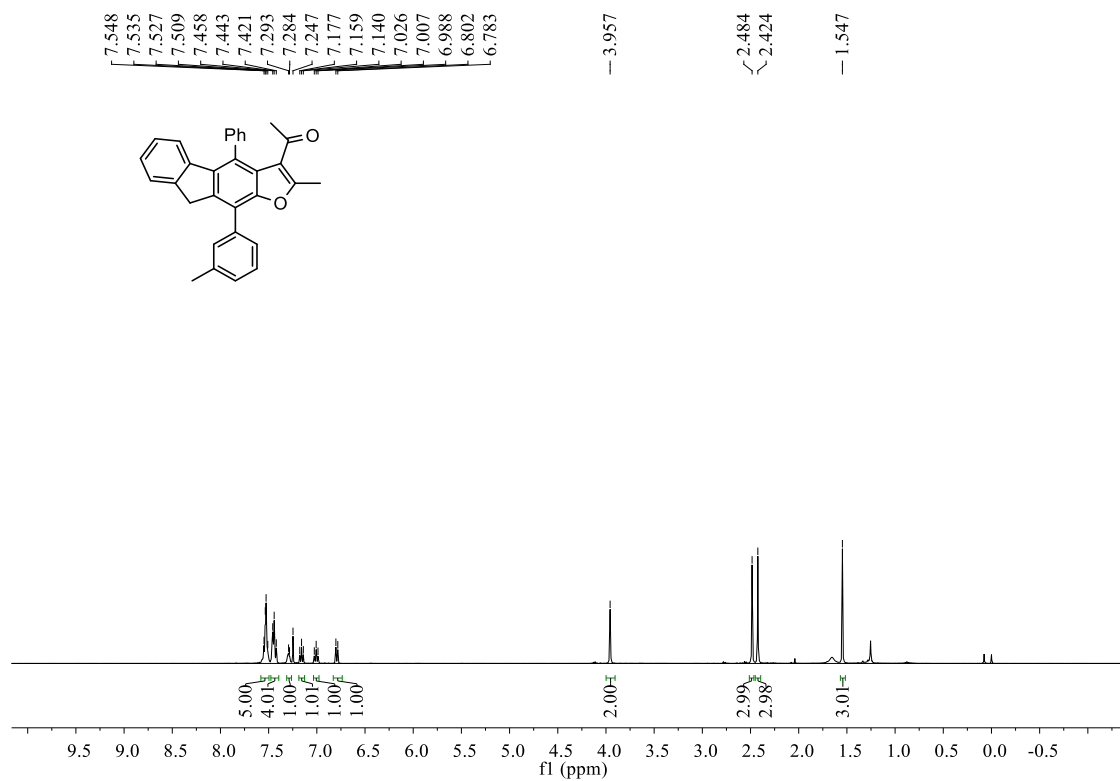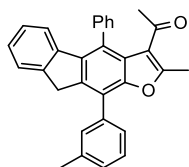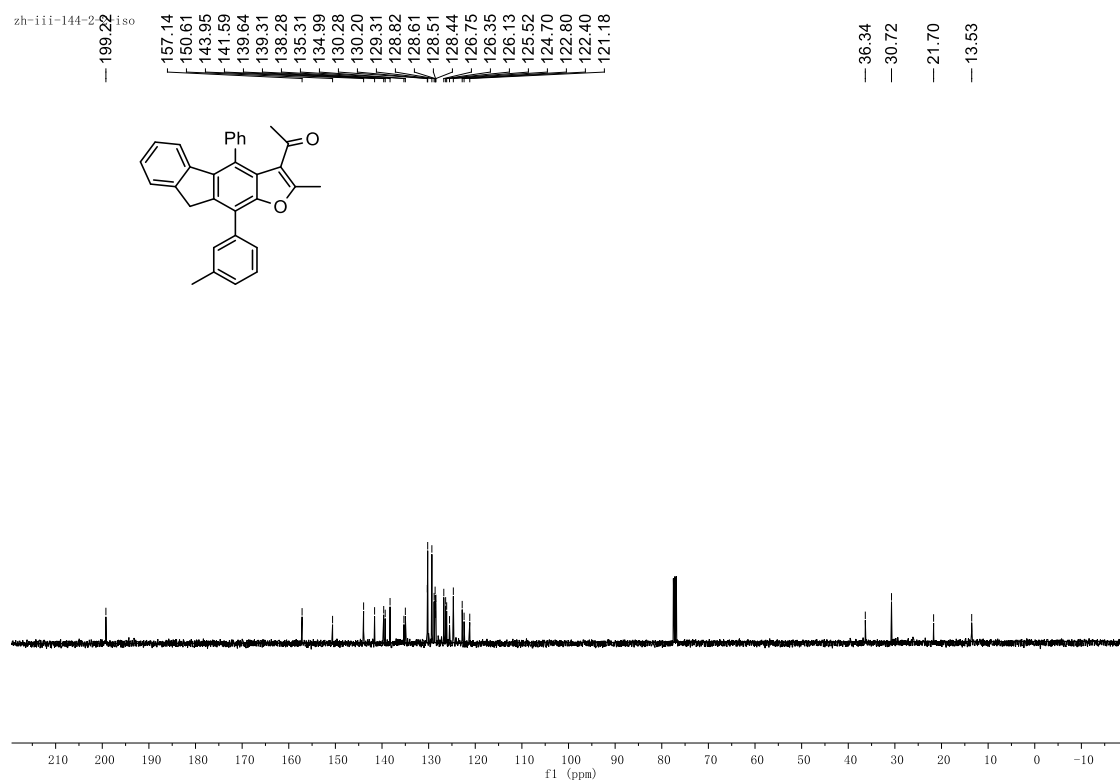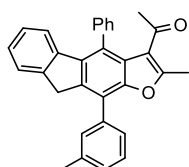

3aj

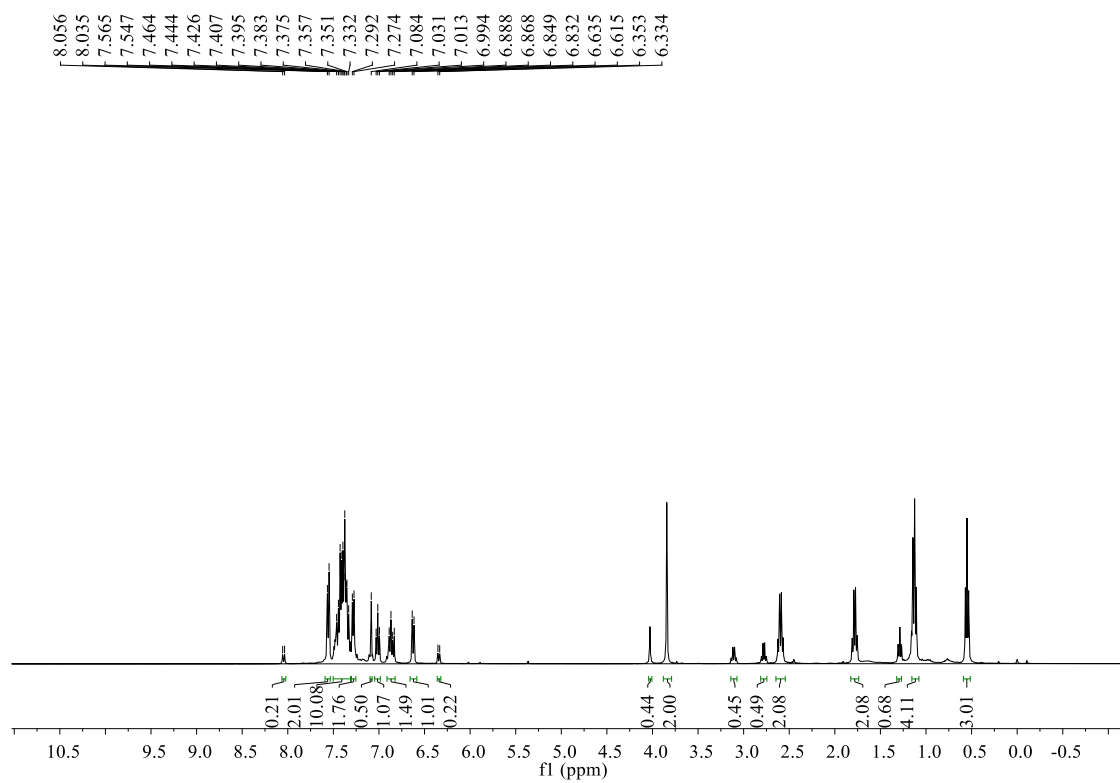

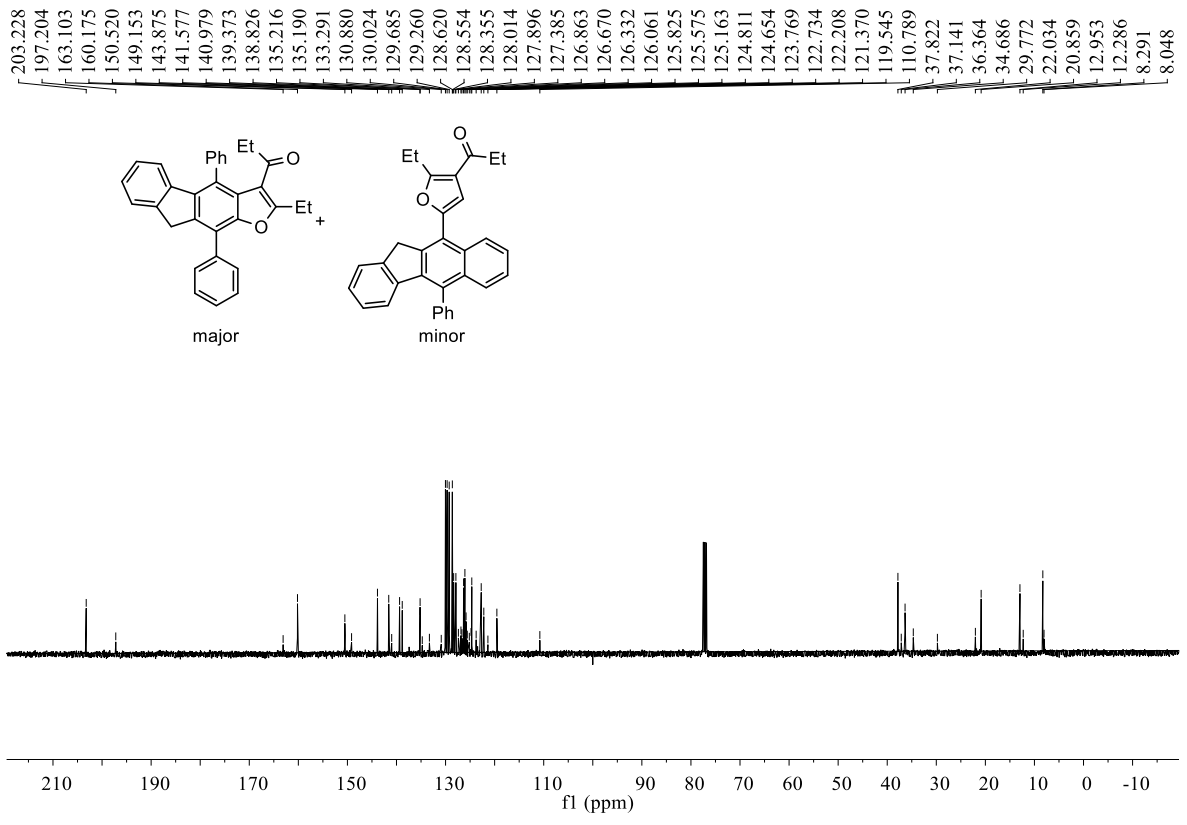

**3ak**

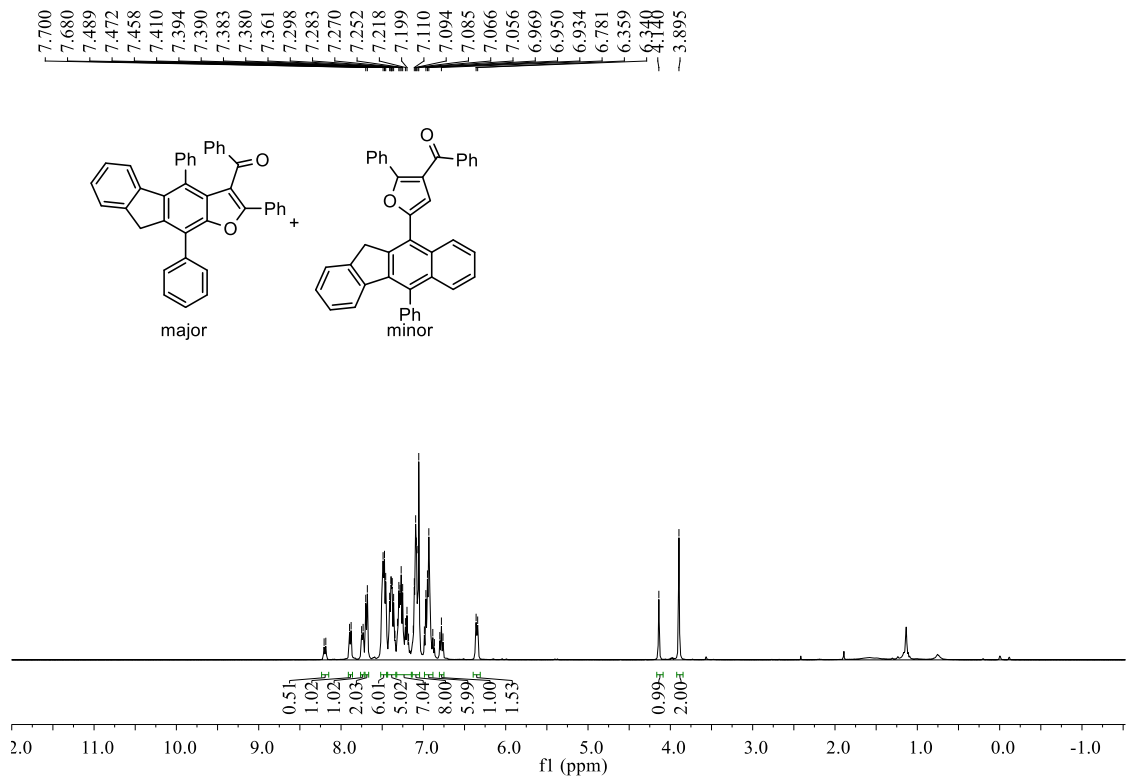

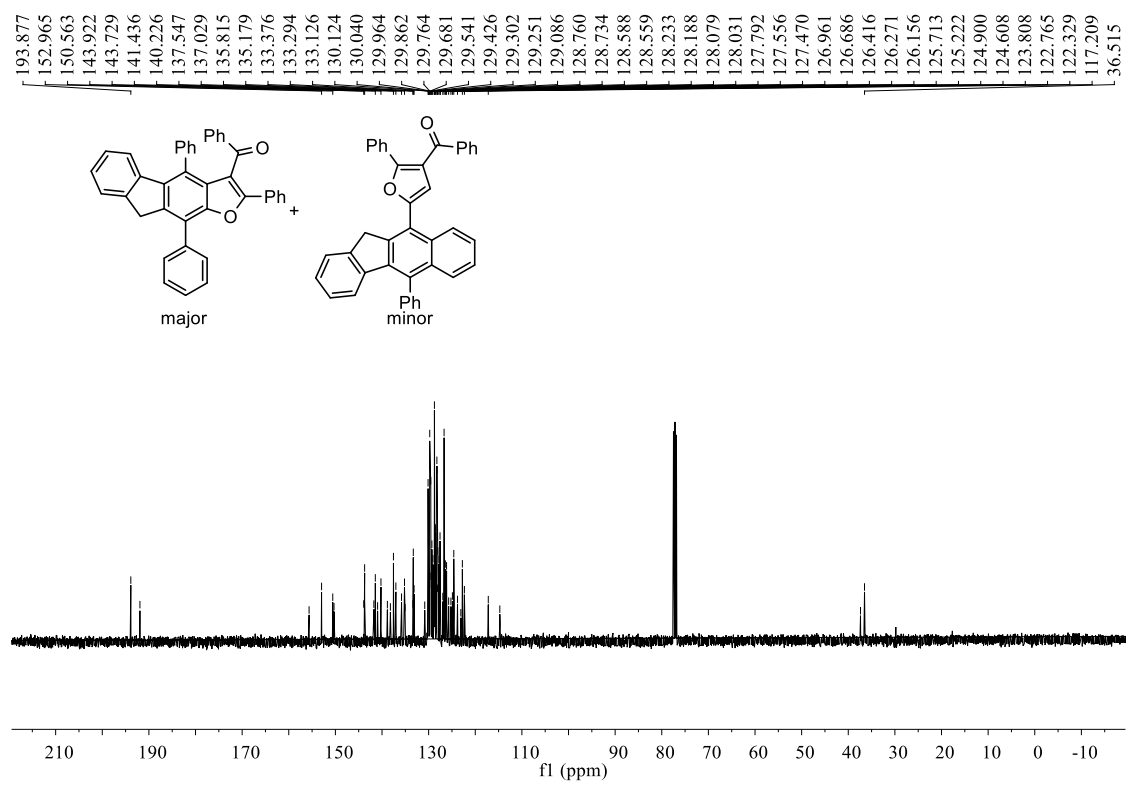

3a

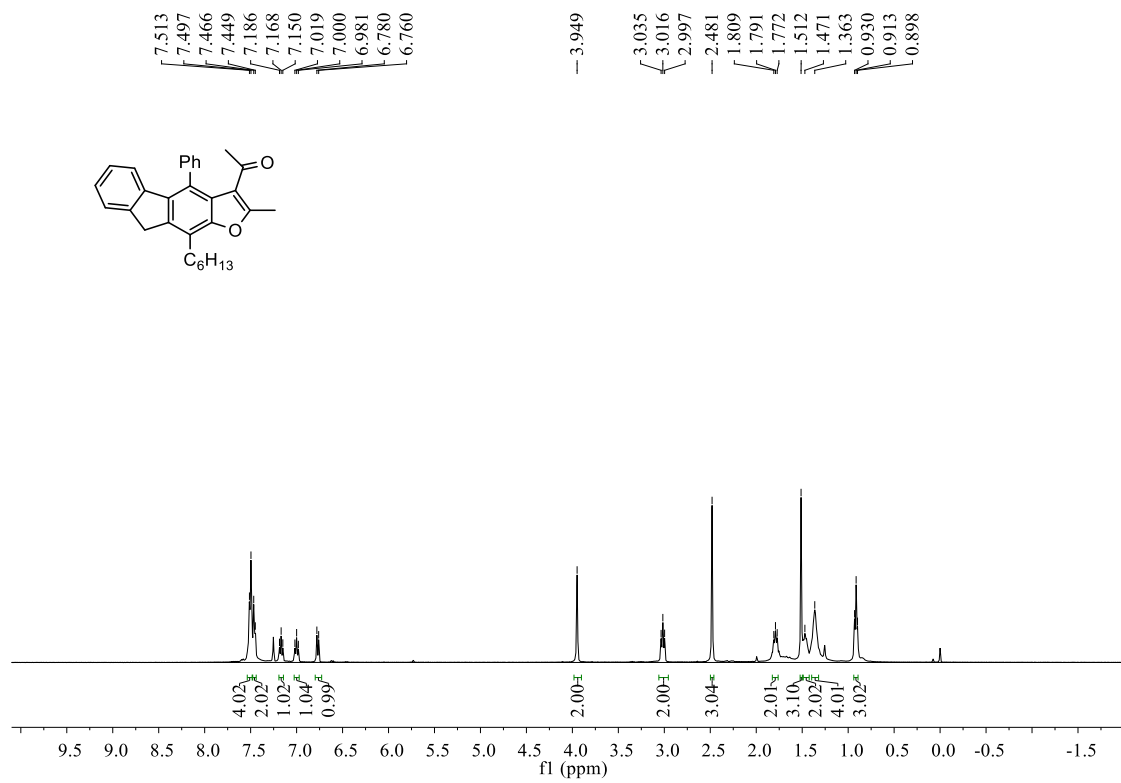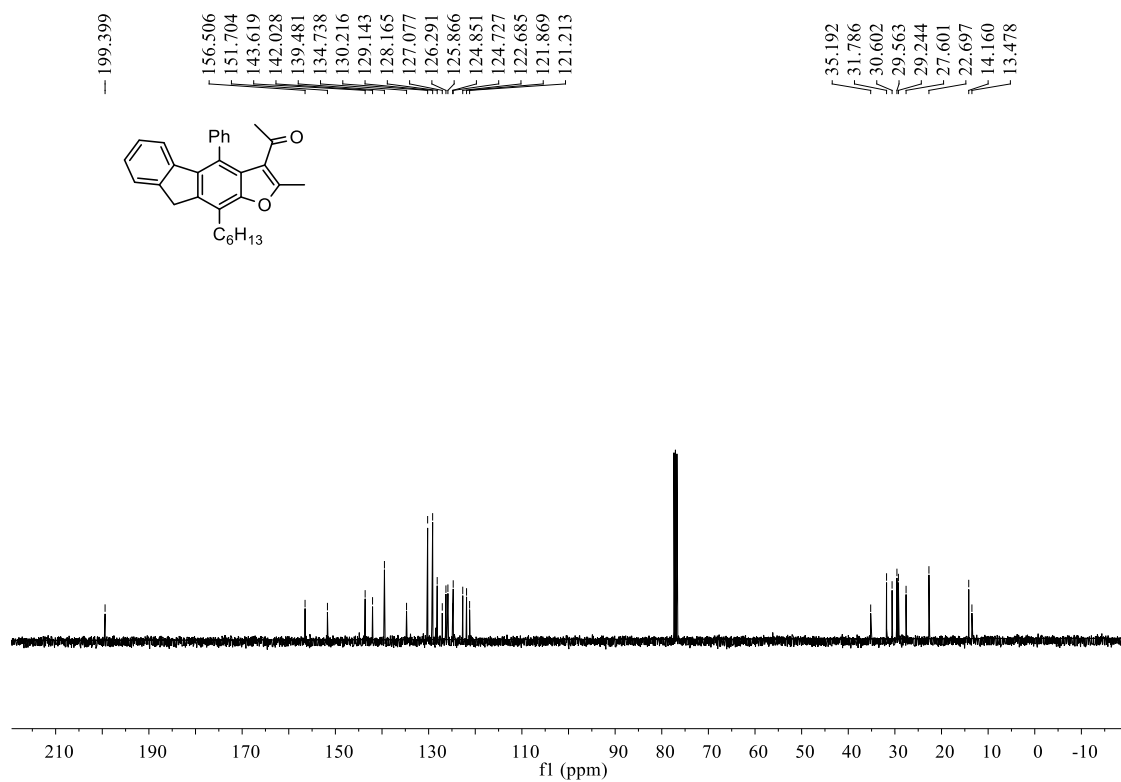

**3am**

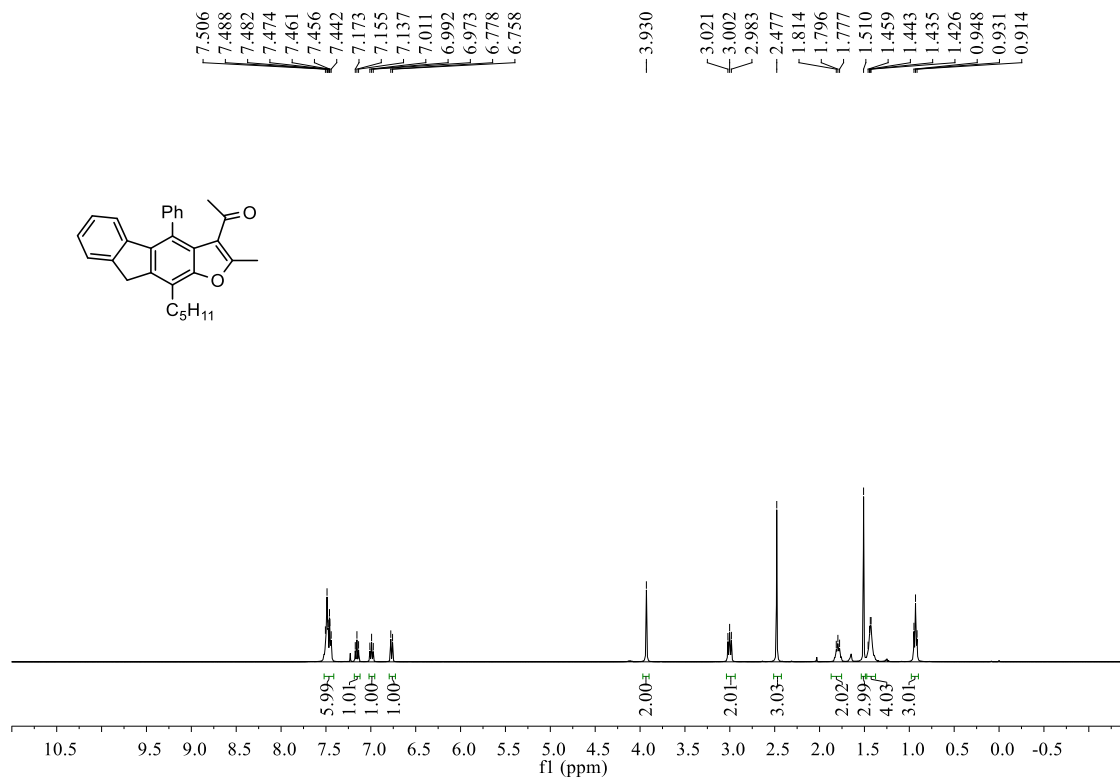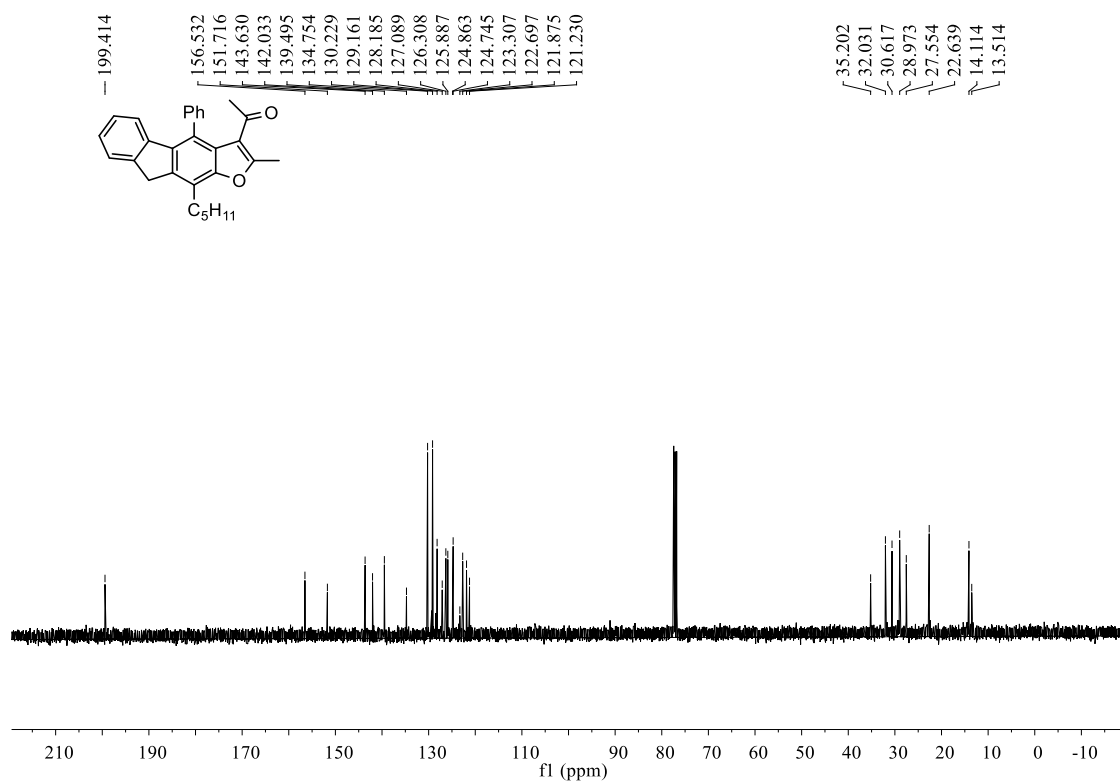



**3an**

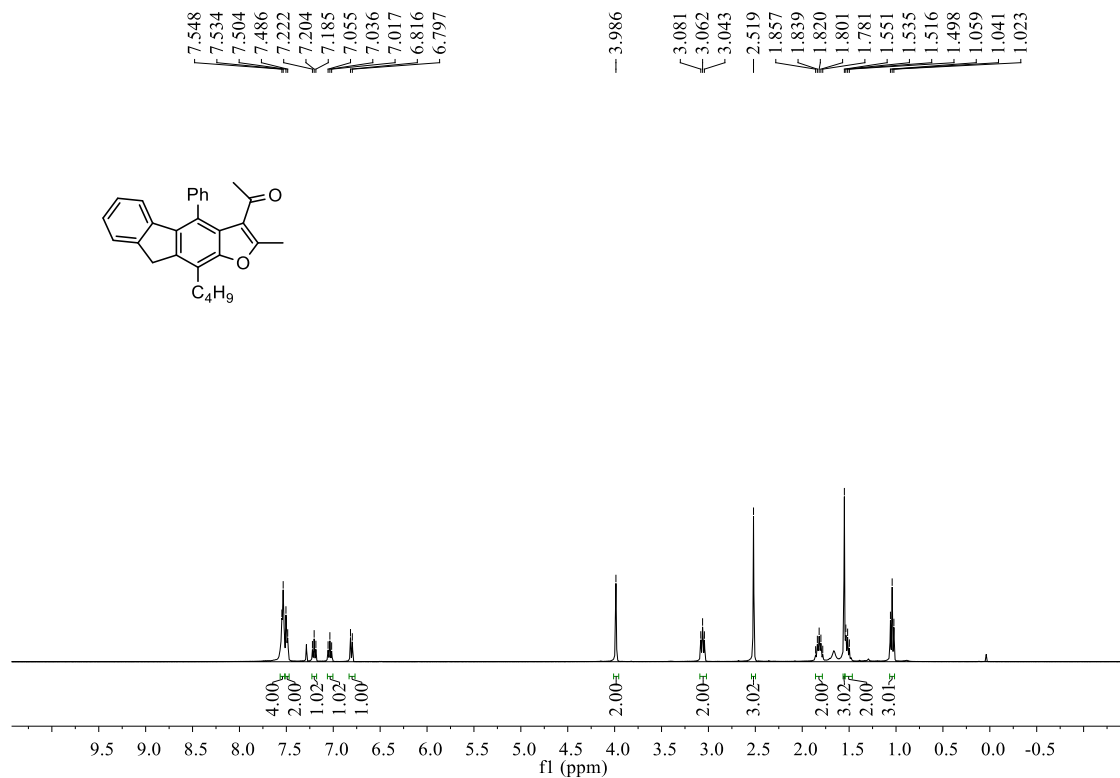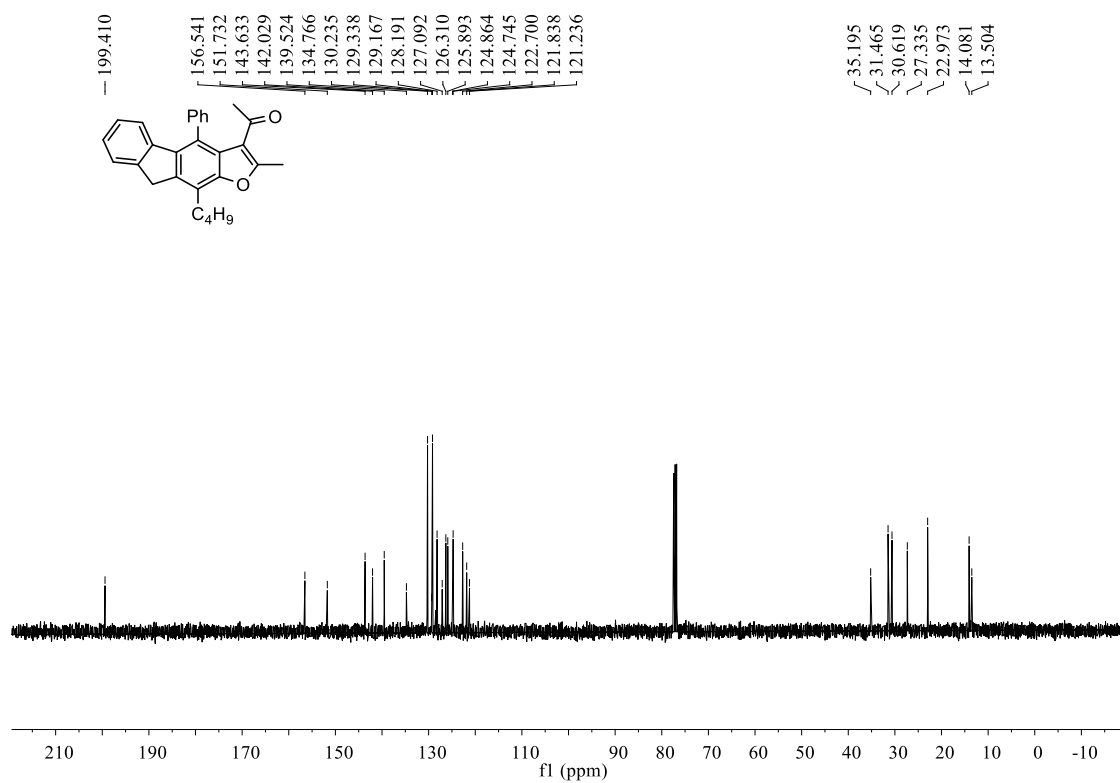

3ao

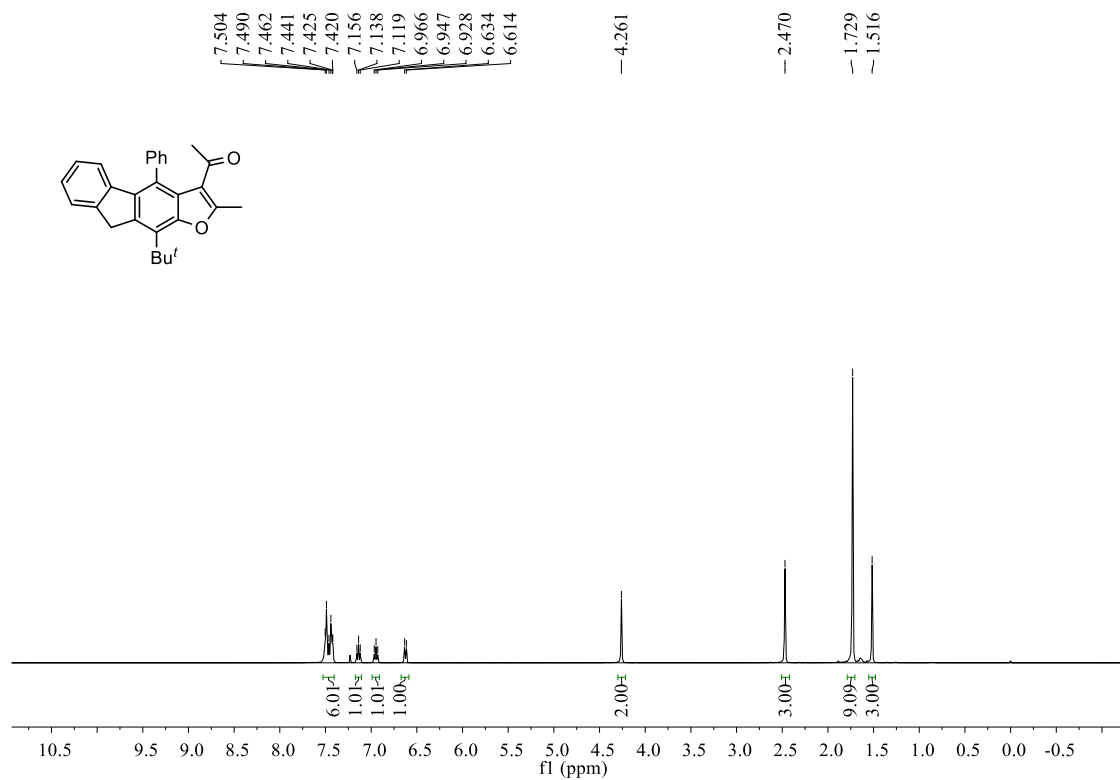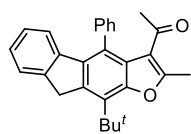

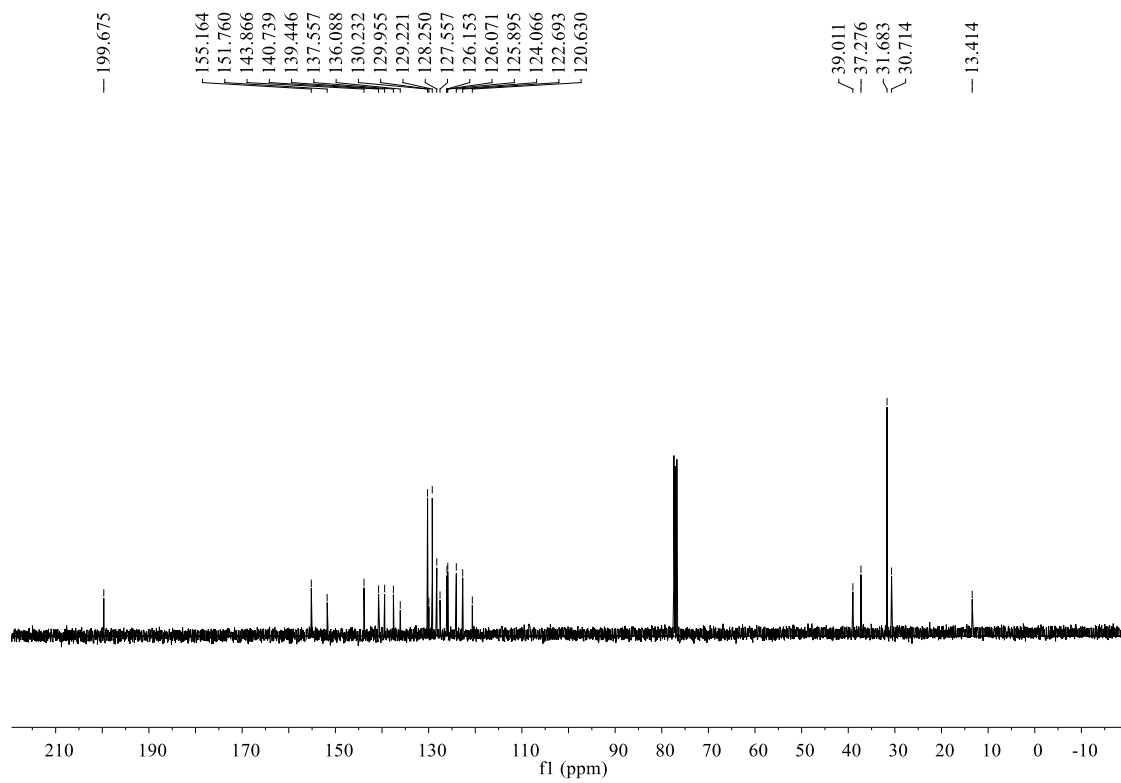

**3ba**

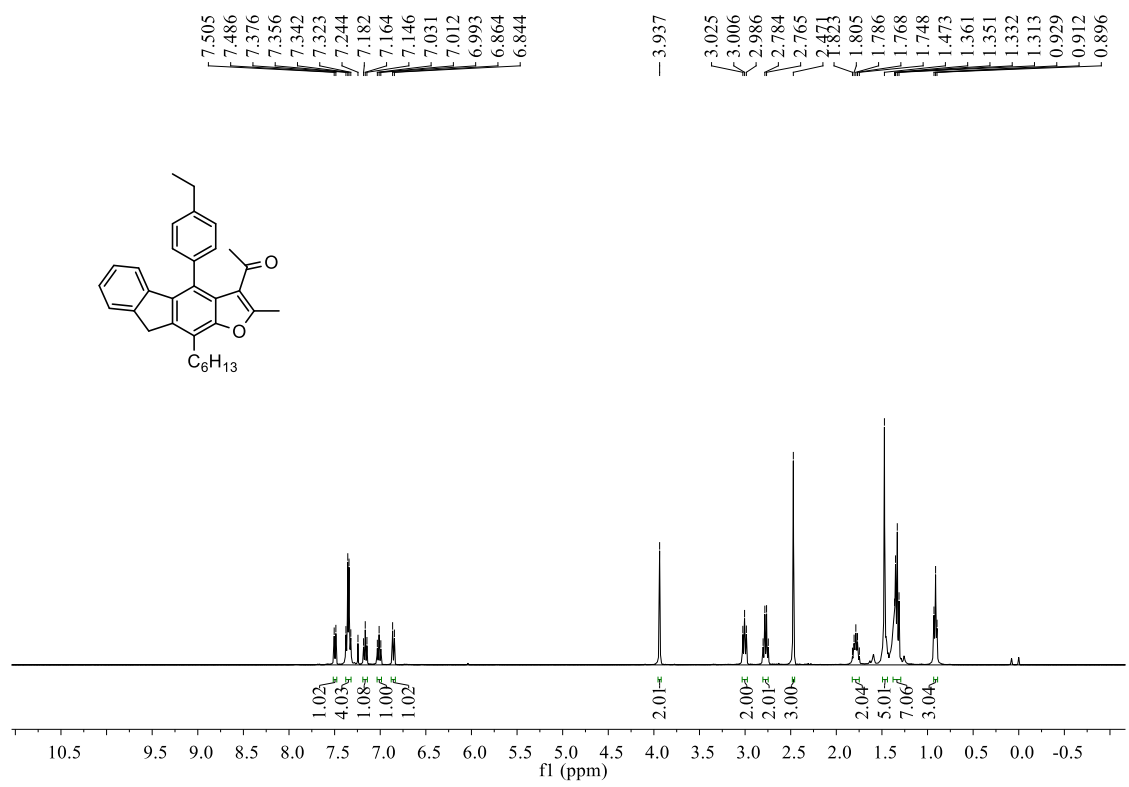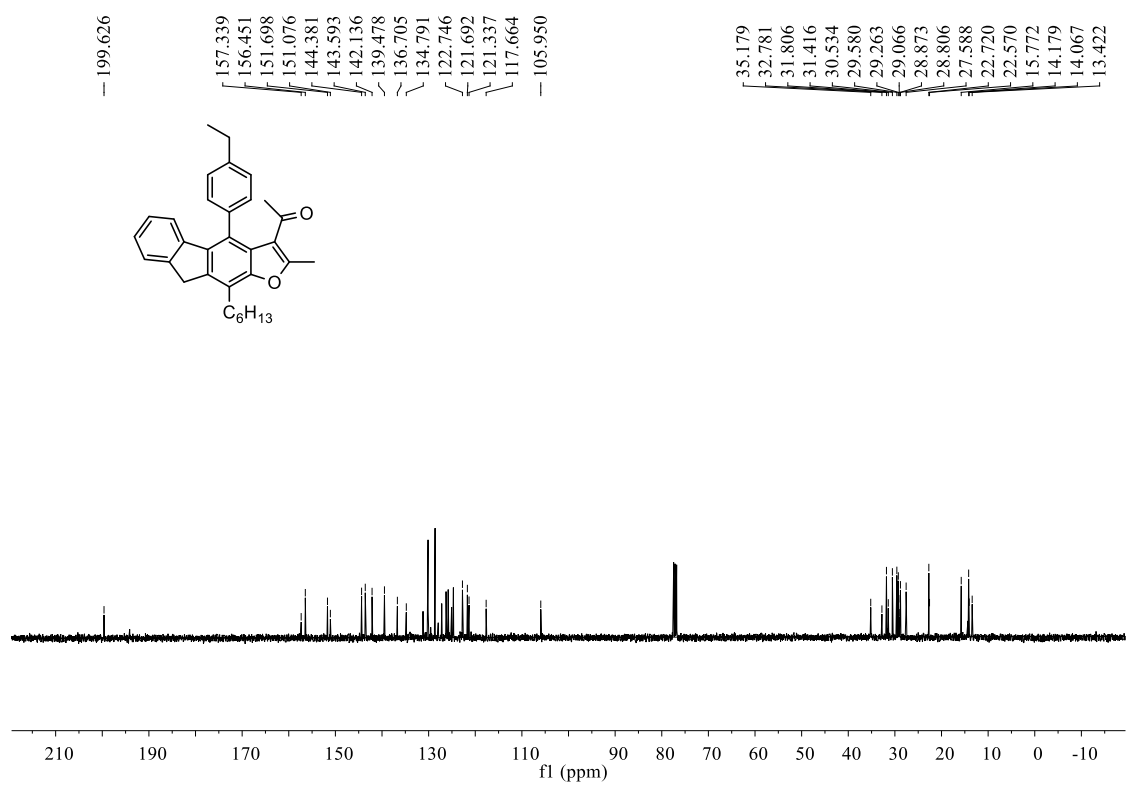

3bb

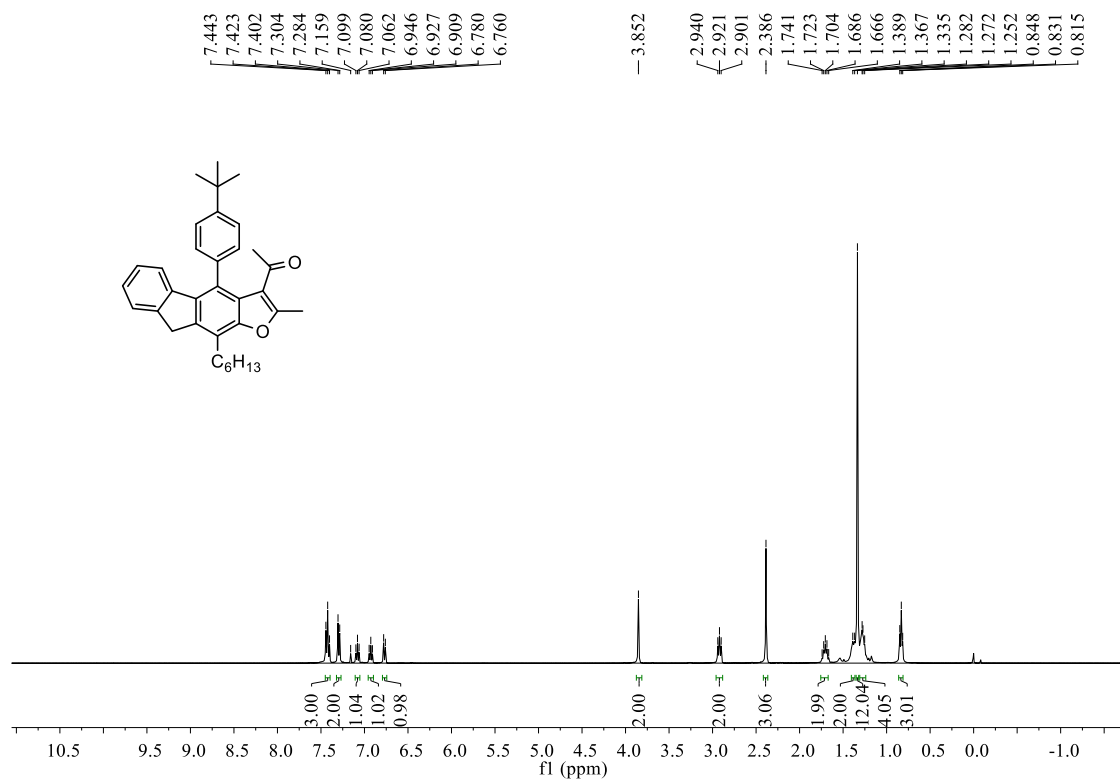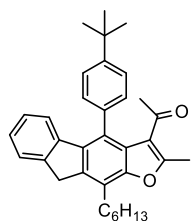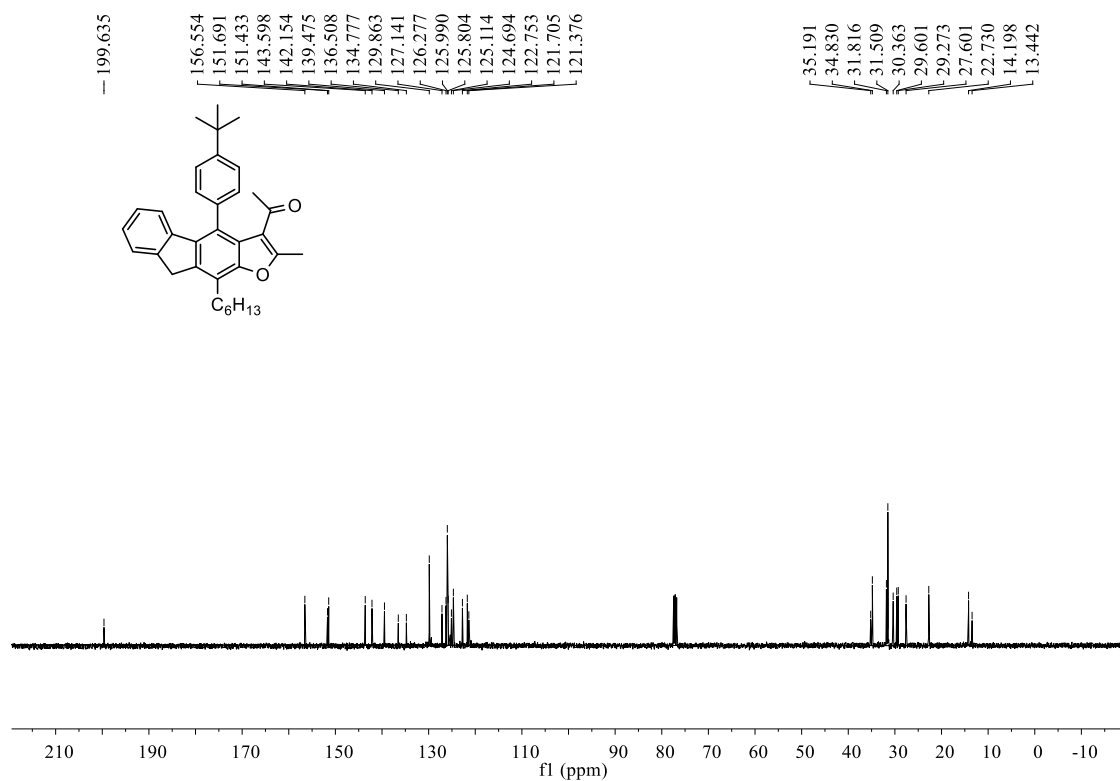

3bc

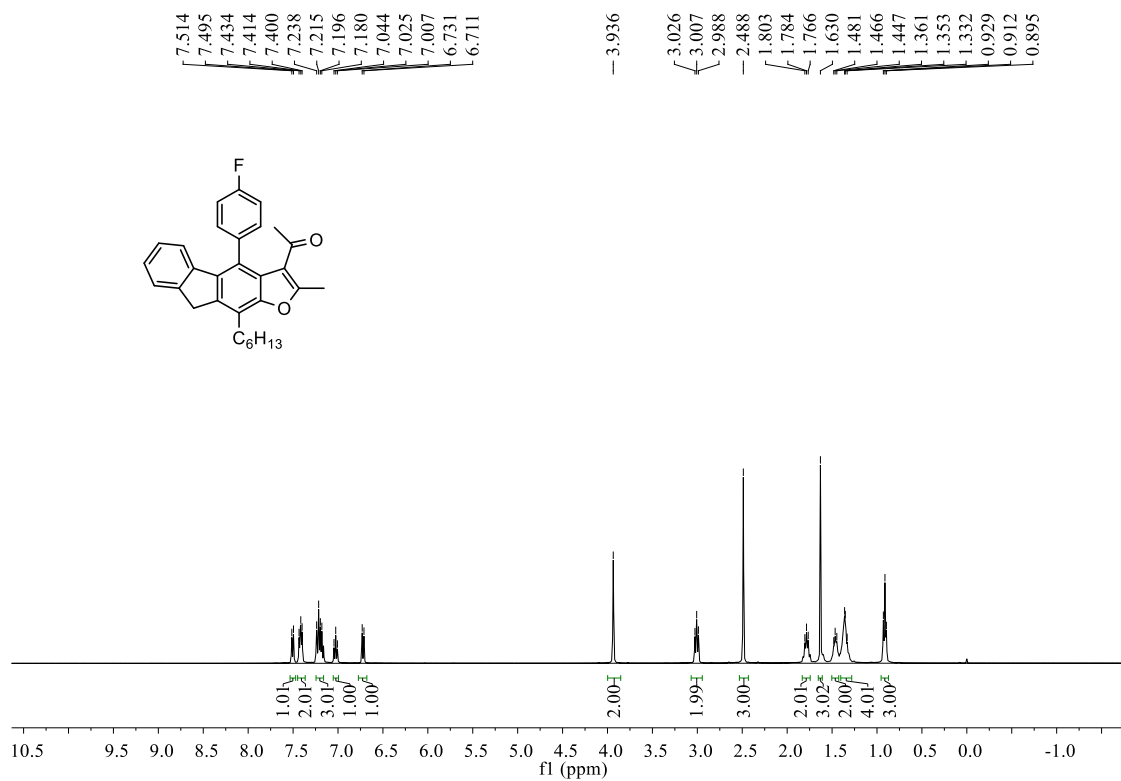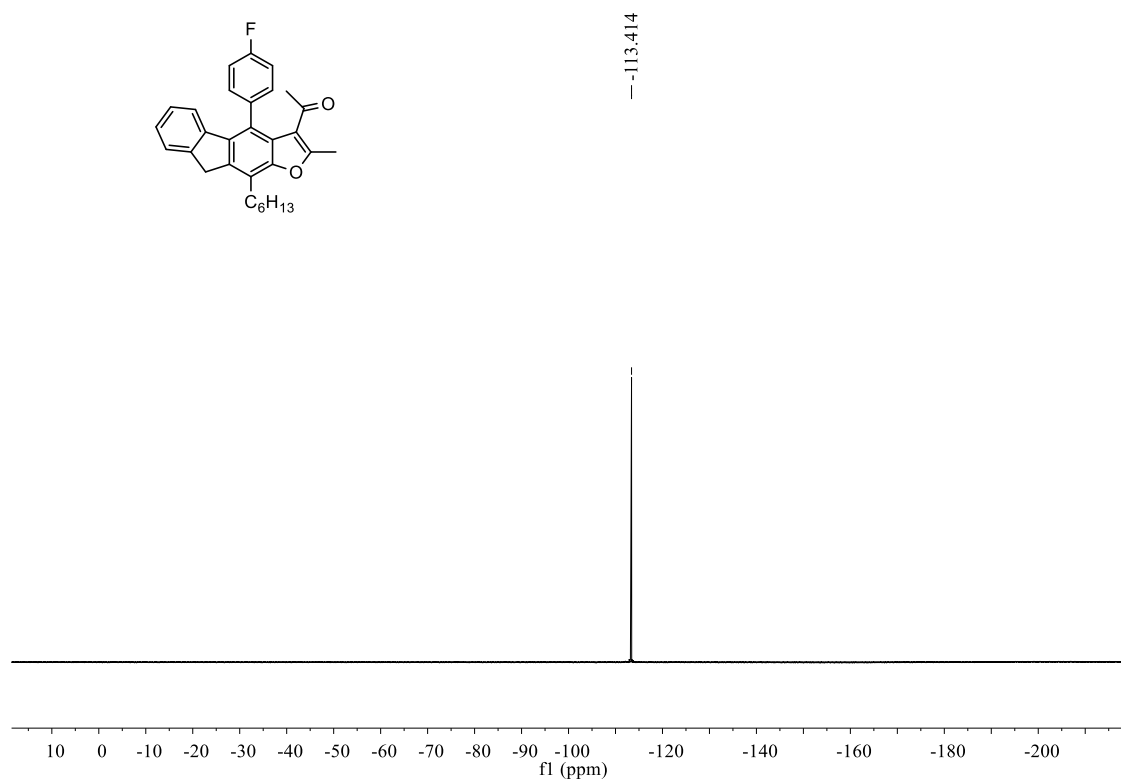

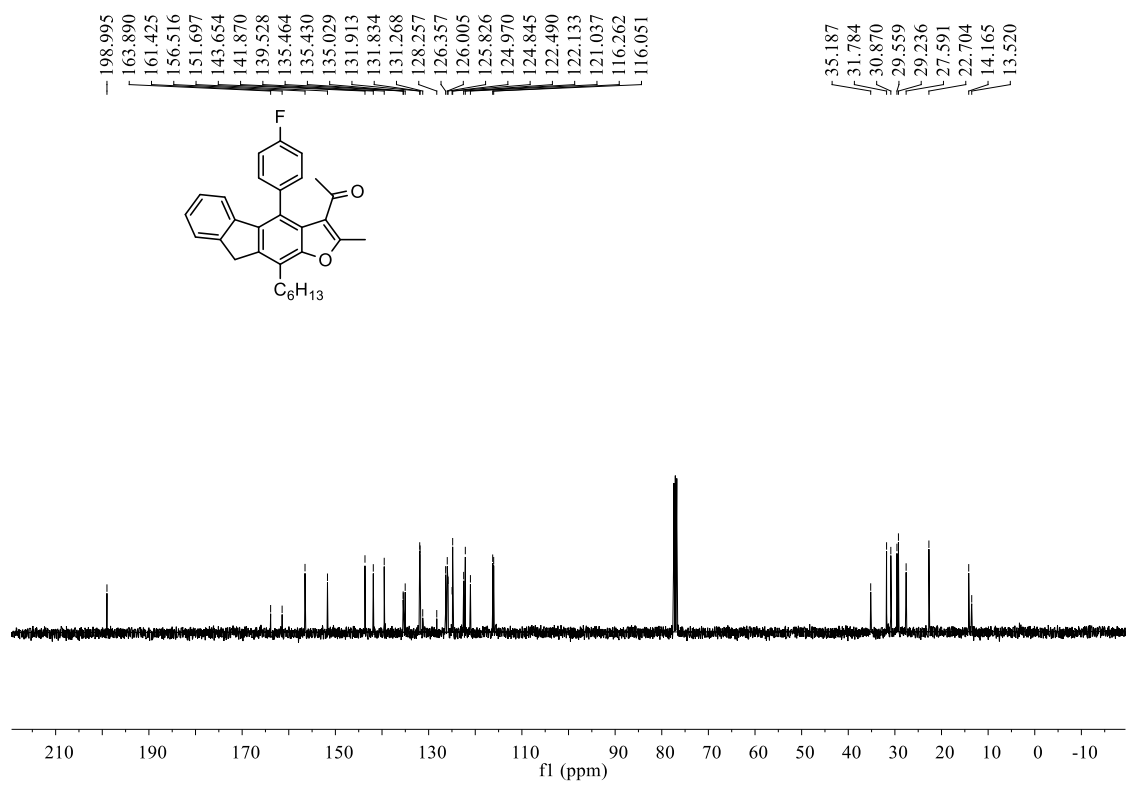

**3bd**

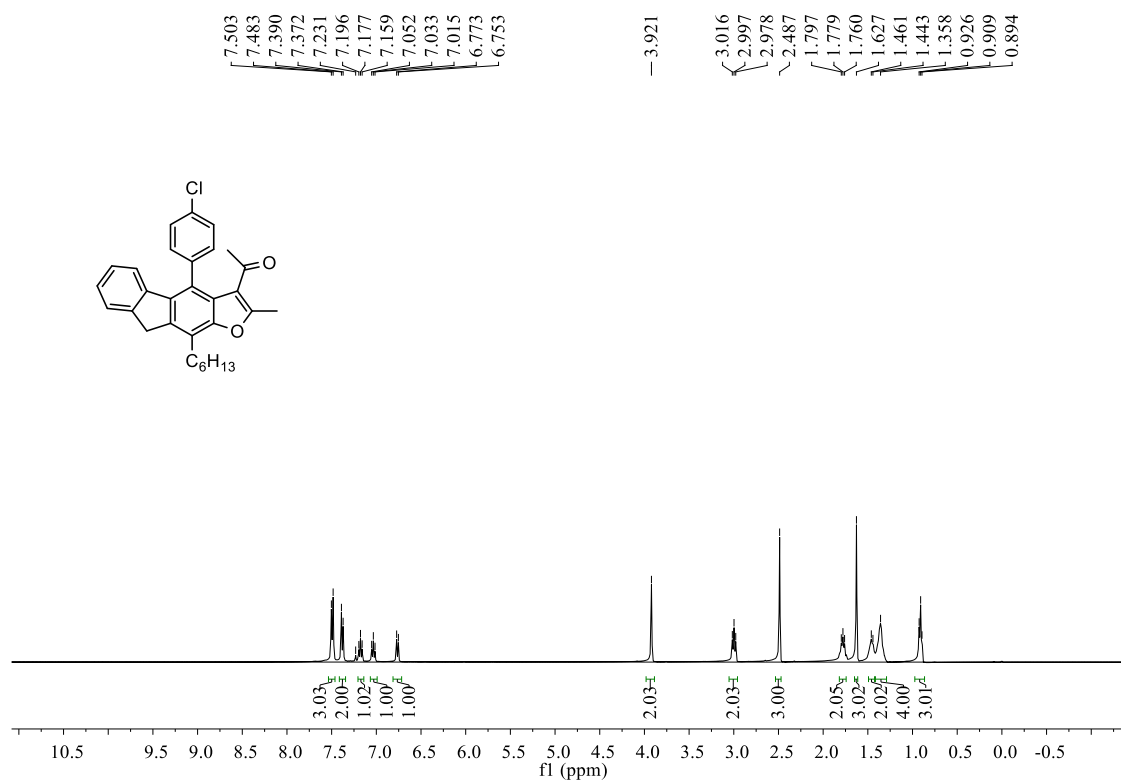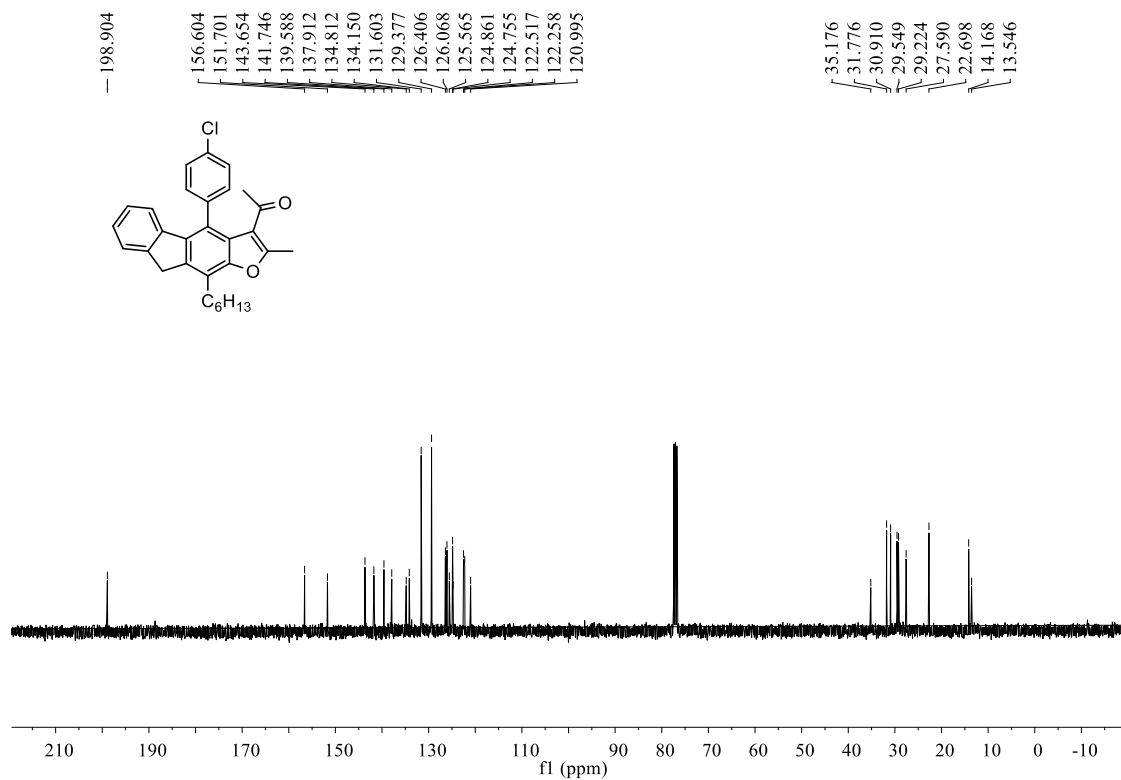



3be

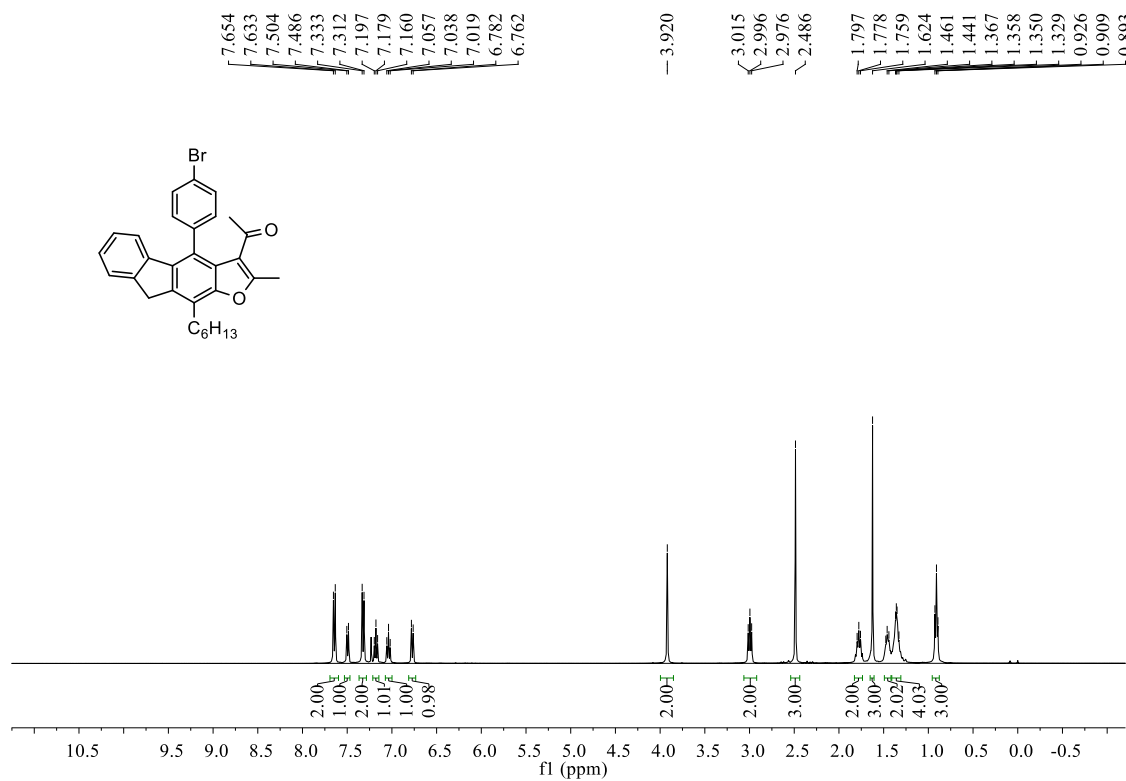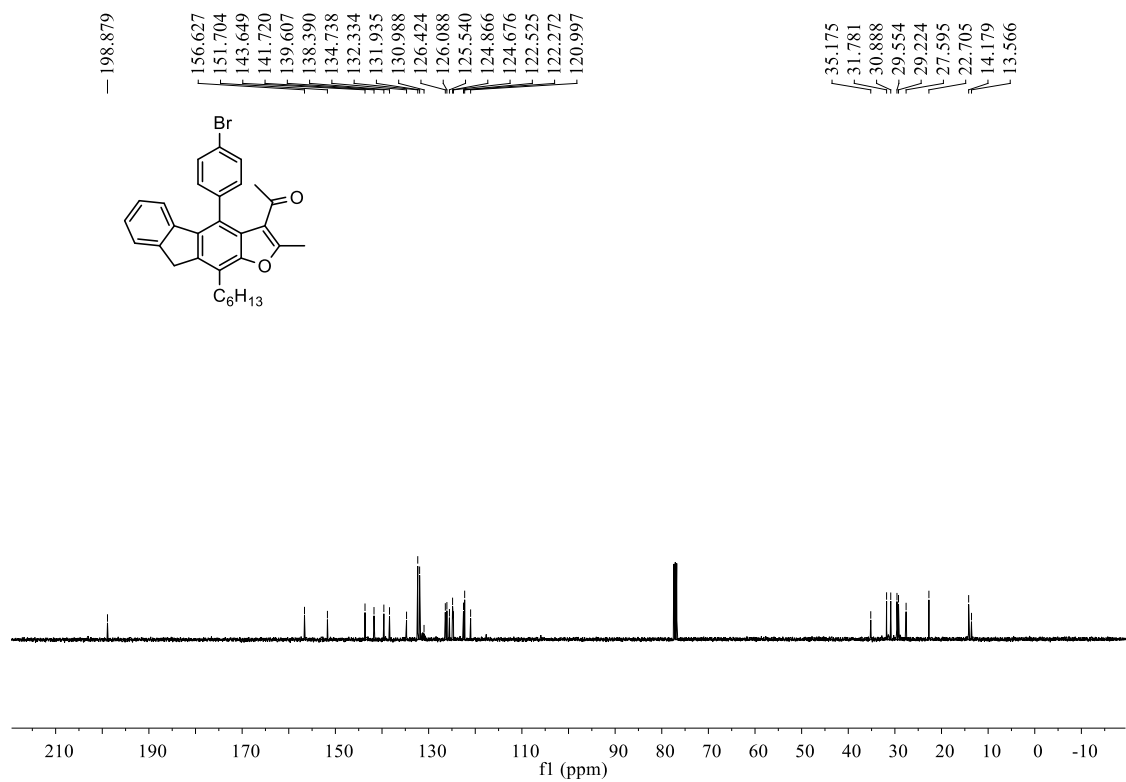

3bf

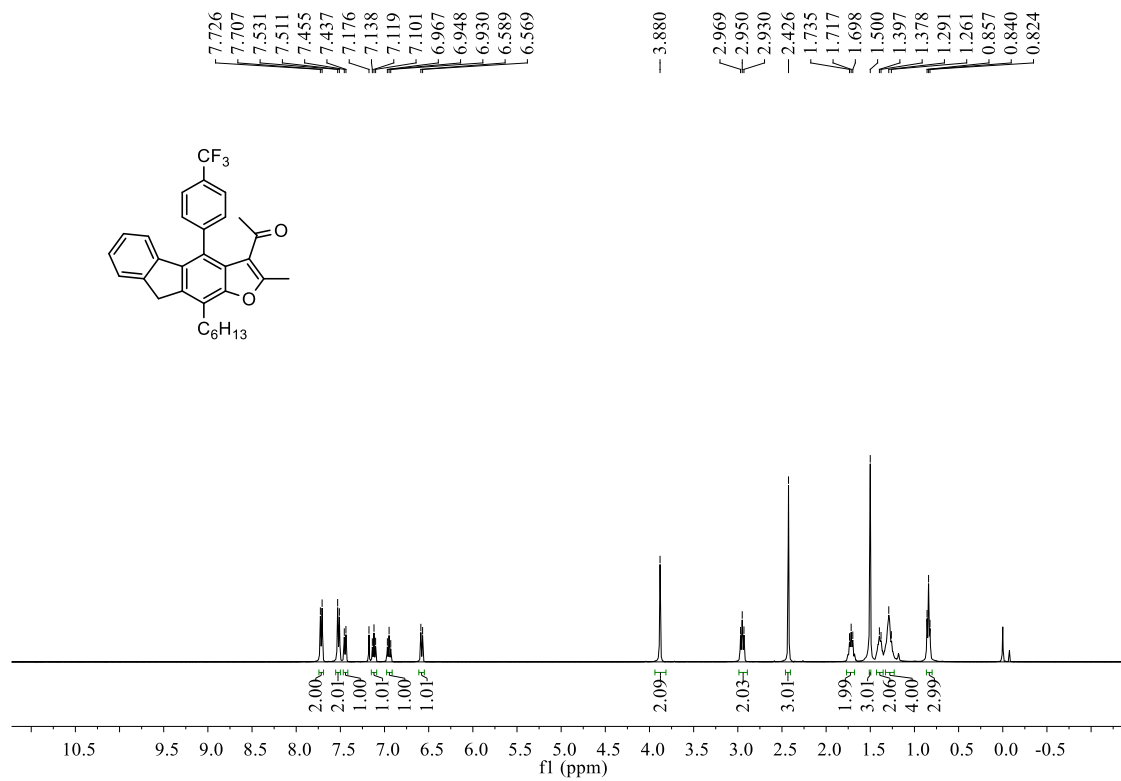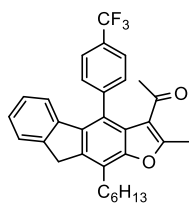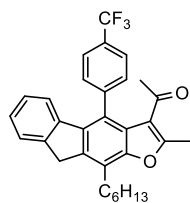

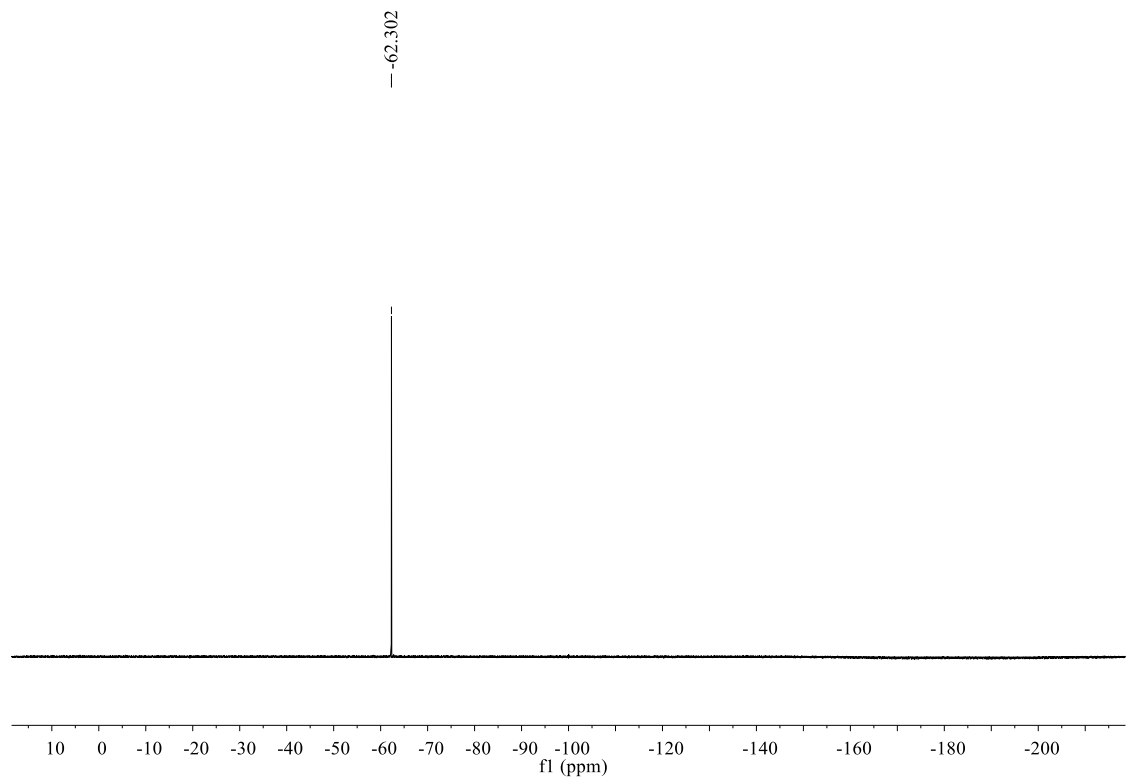

198.474  
156.834  
151.728  
143.703  
143.365  
141.544  
139.680  
134.685  
130.842  
130.715  
130.517  
130.193  
129.870  
126.447  
126.188  
126.062  
126.027  
125.990  
125.953  
125.301  
124.934  
124.547  
122.866  
122.584  
122.373  
120.866  
117.652

35.159  
31.772  
30.660  
29.554  
29.218  
27.594  
22.696  
14.144  
13.610

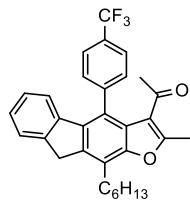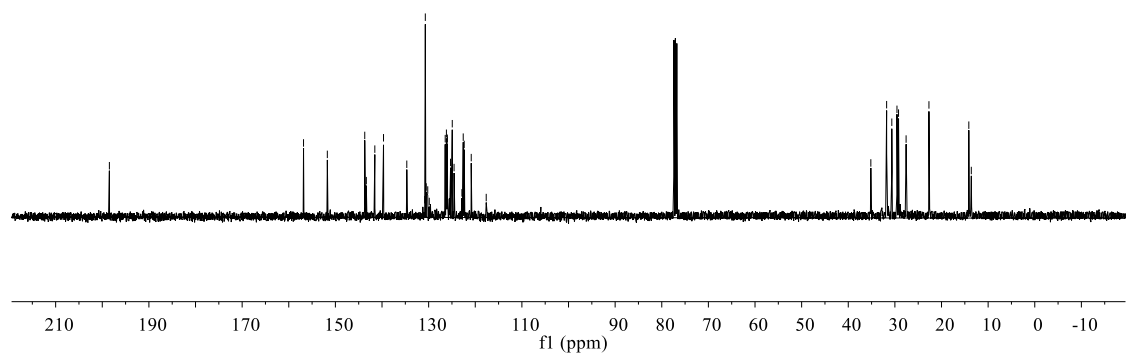

**3bg**

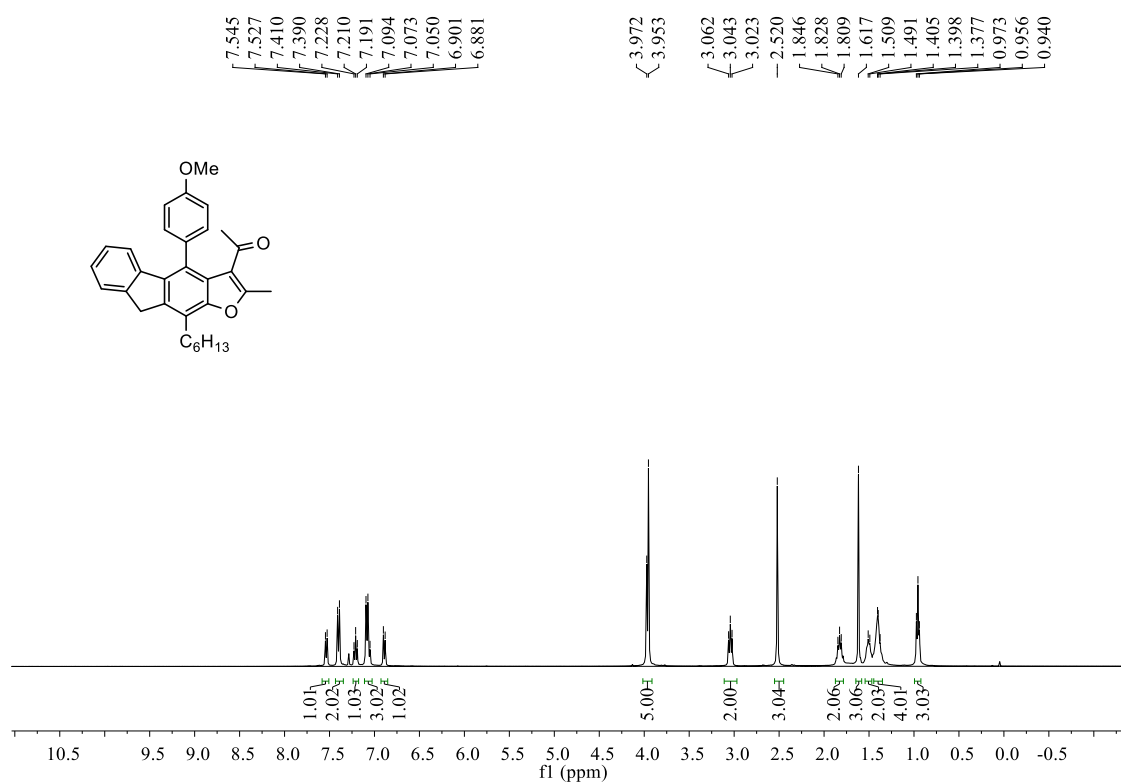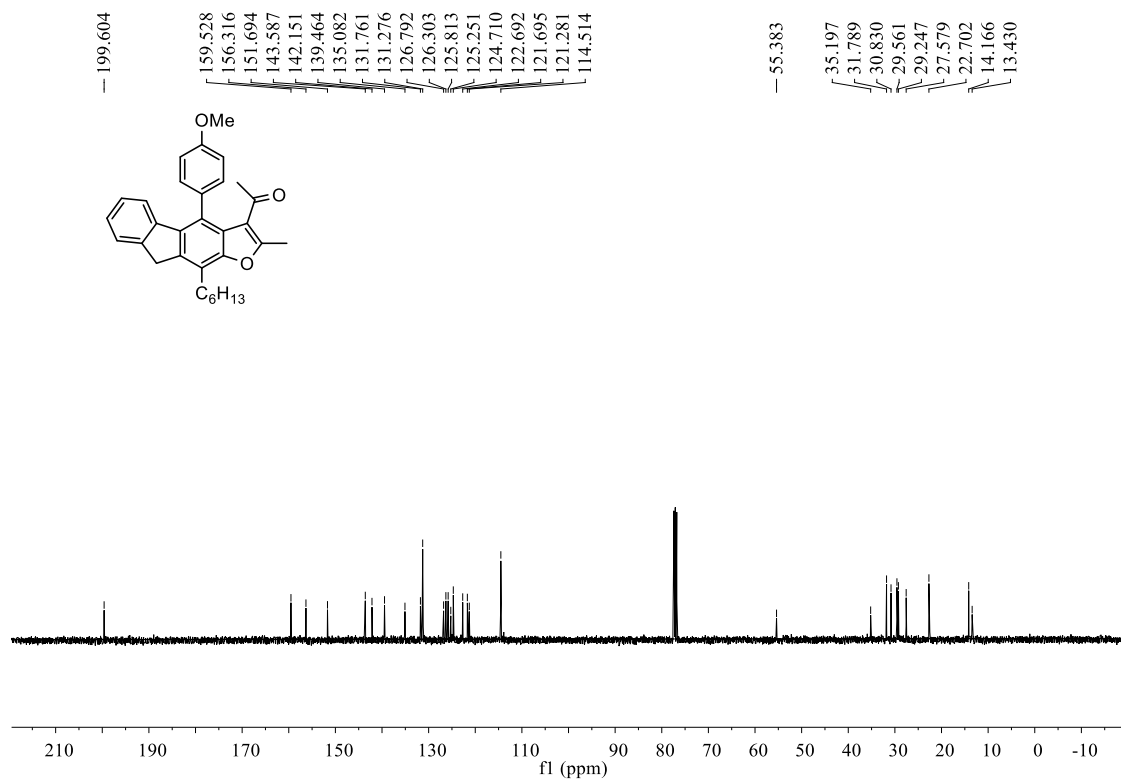

**3bh**

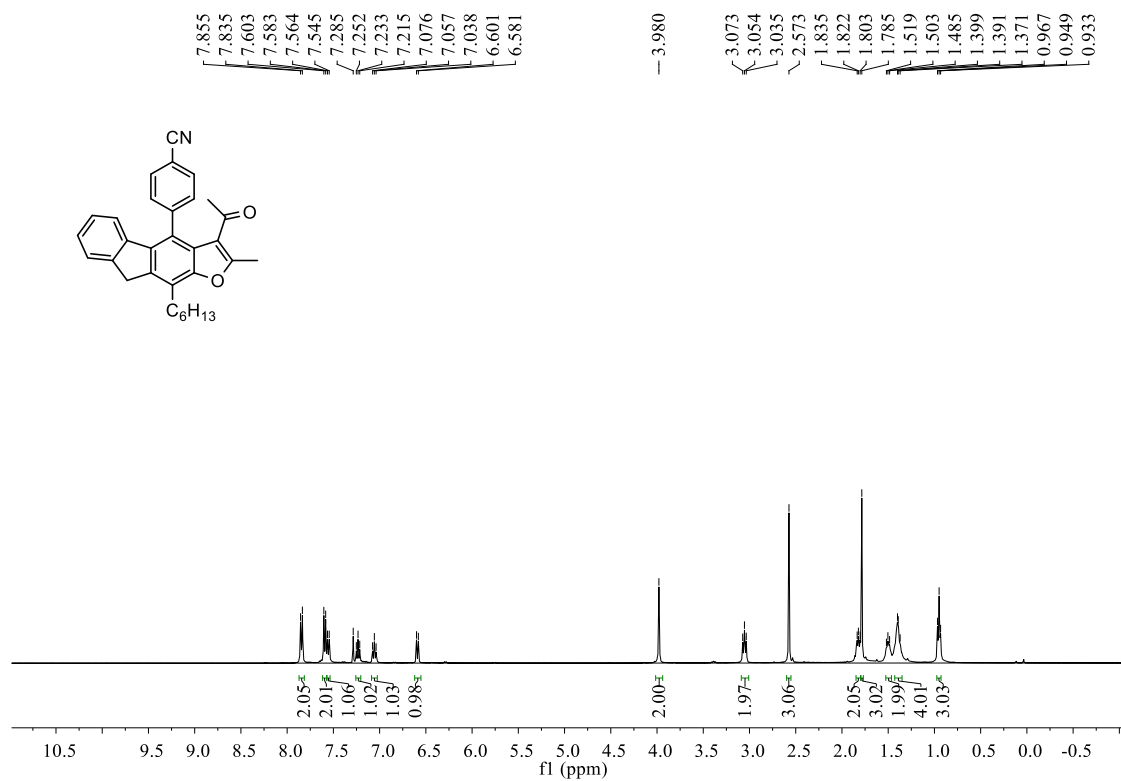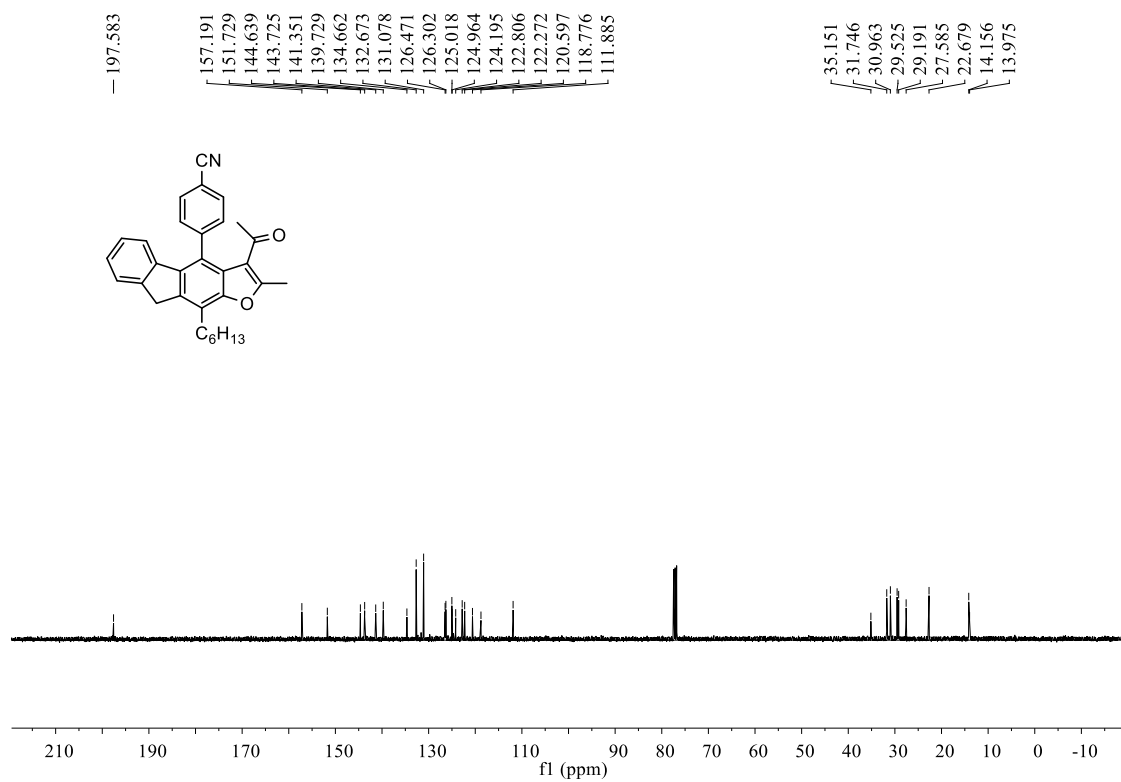

3bi

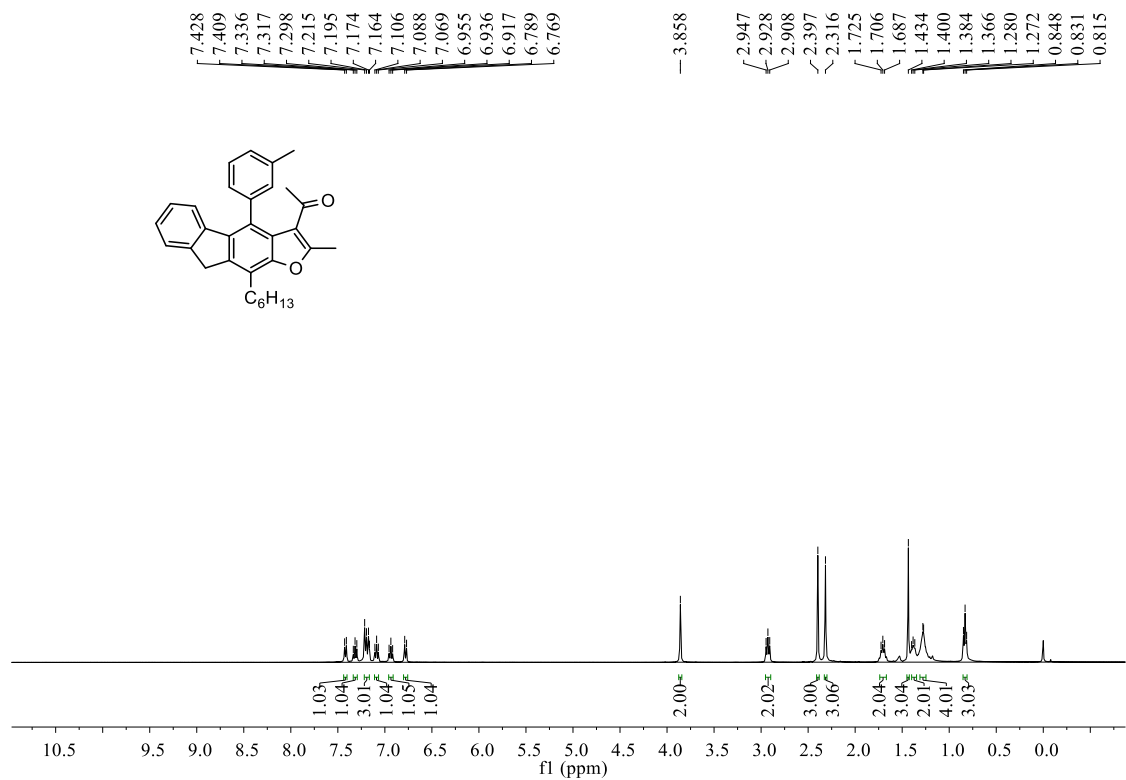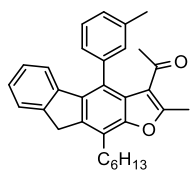

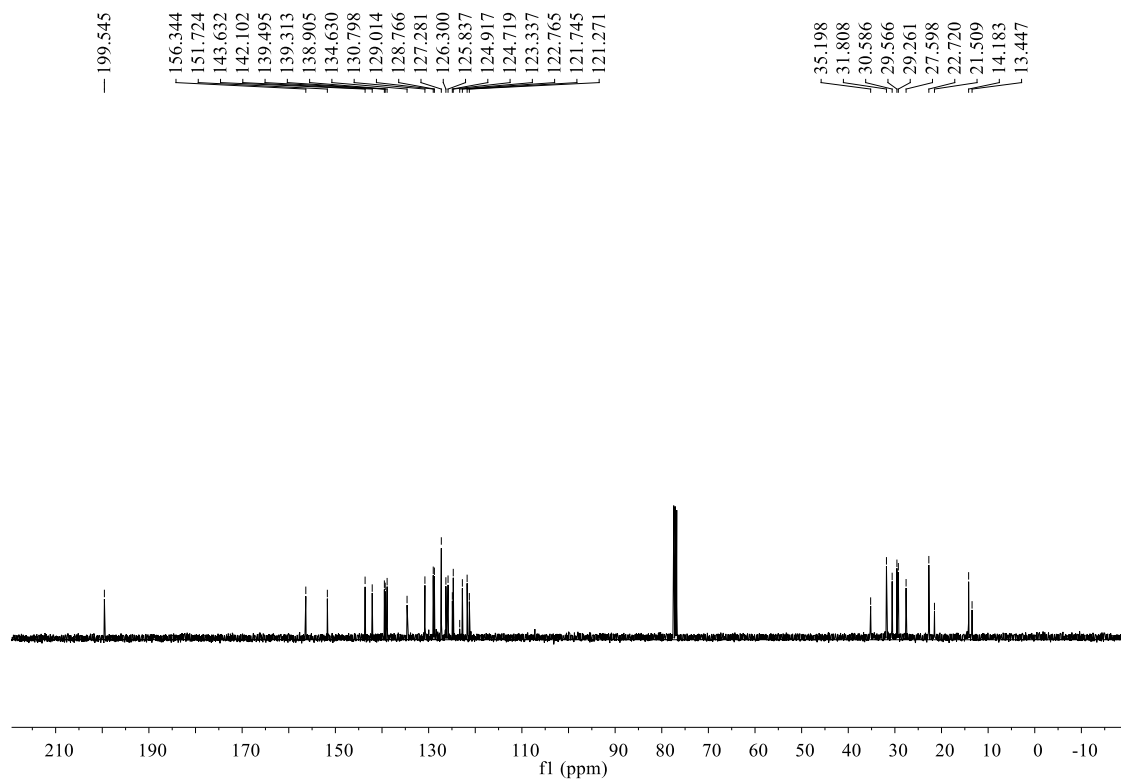

**3bj**

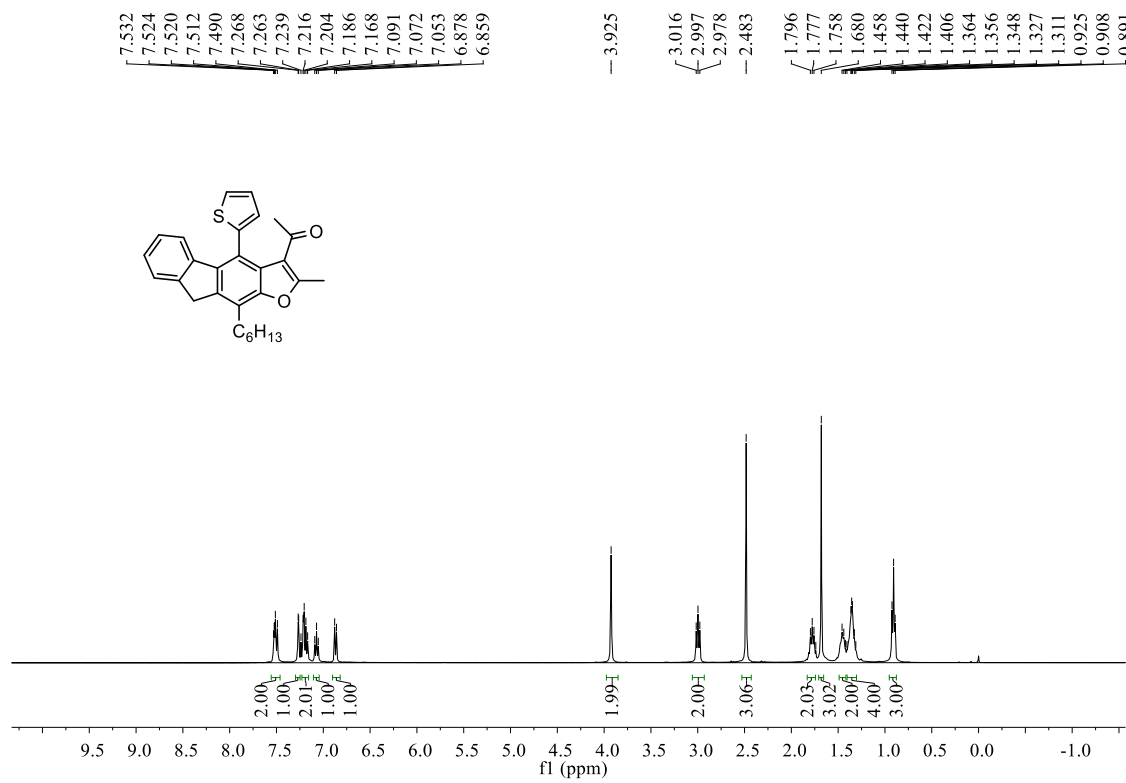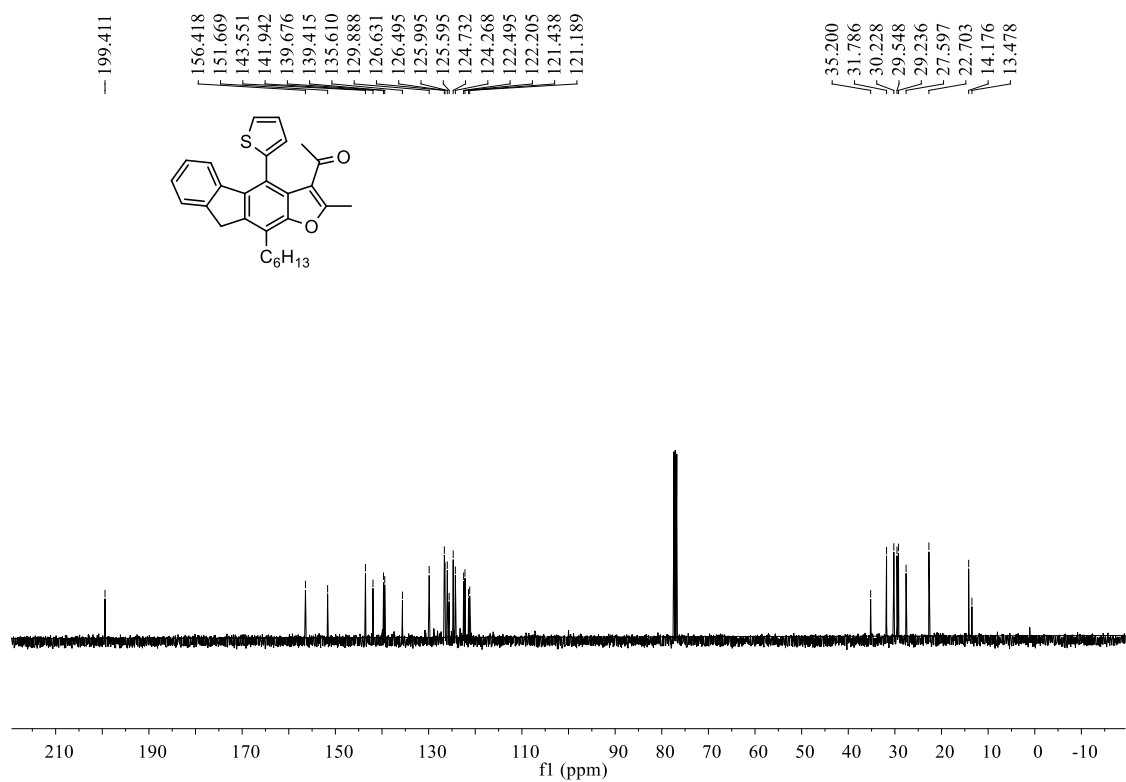



3bk

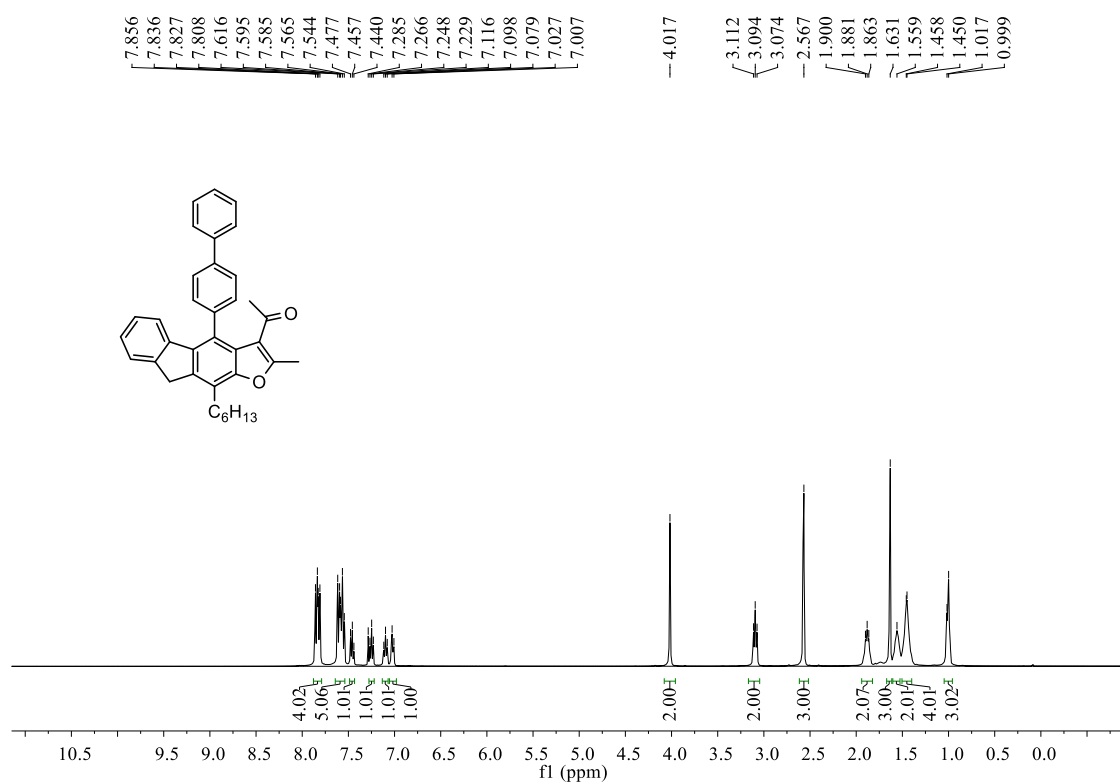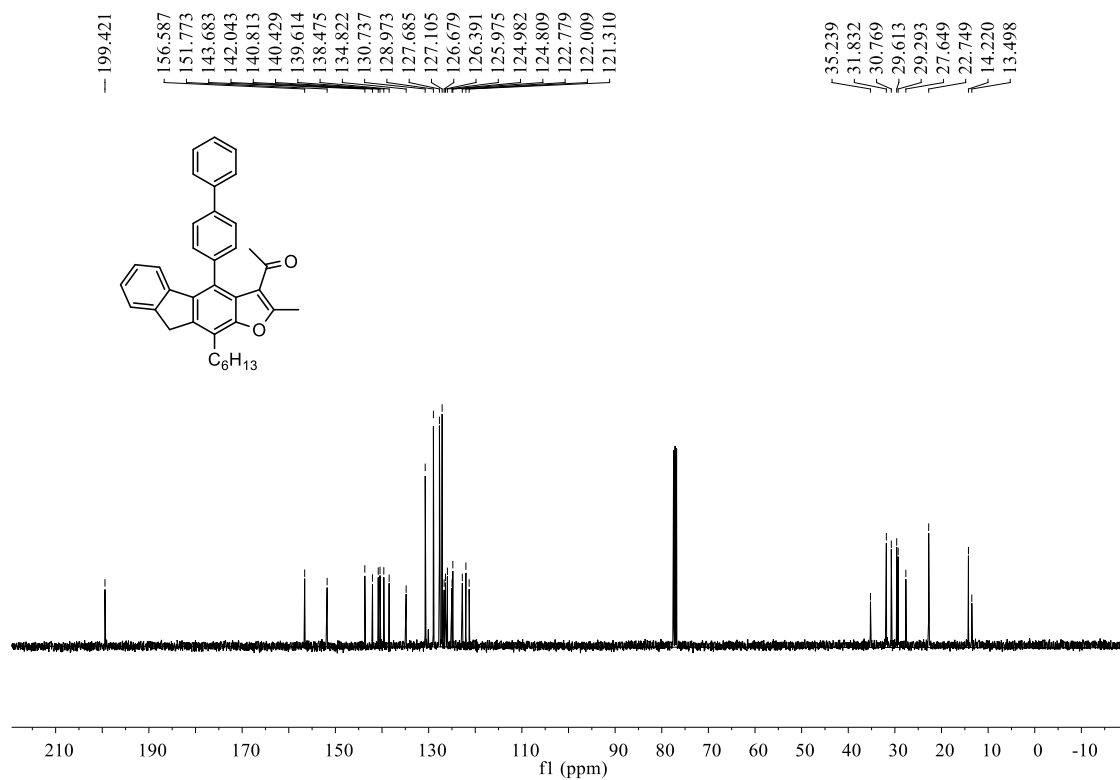

3bl

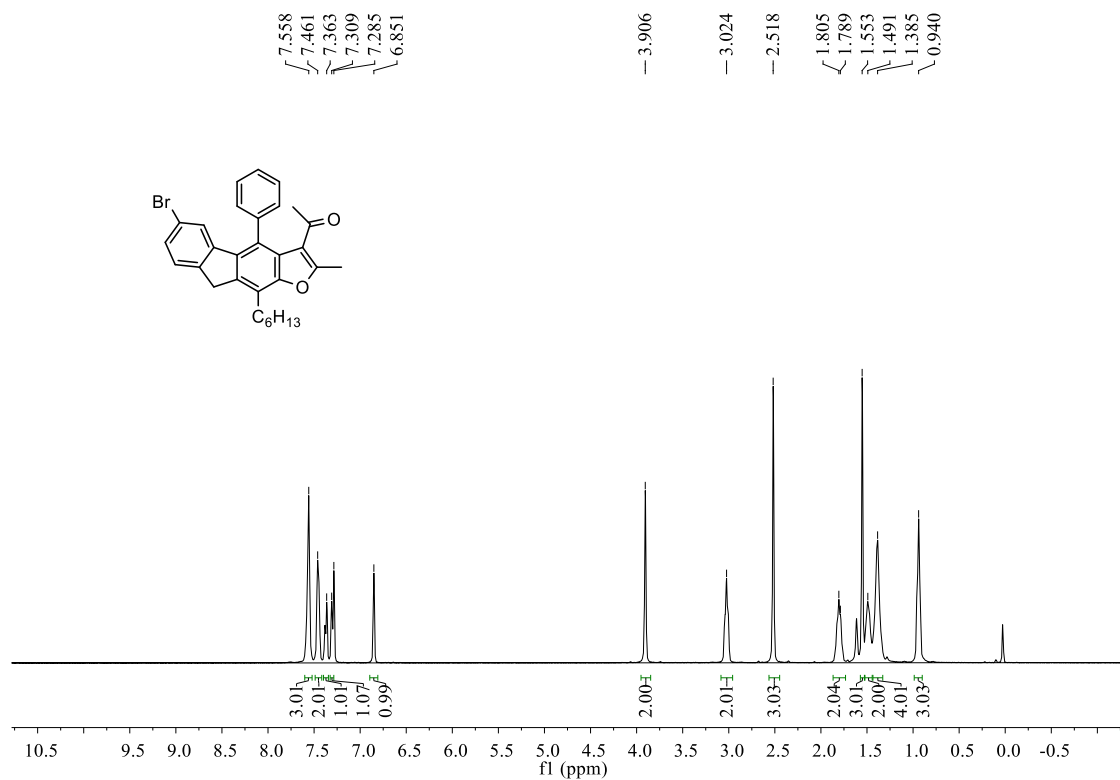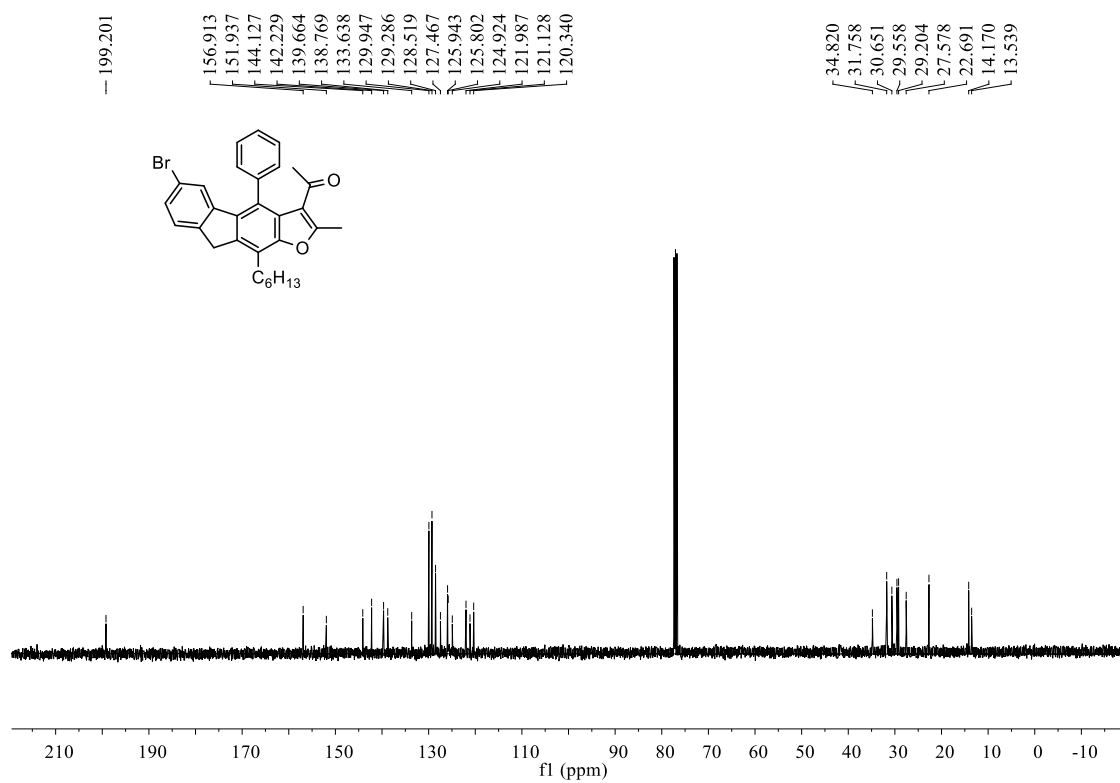

**3bm**

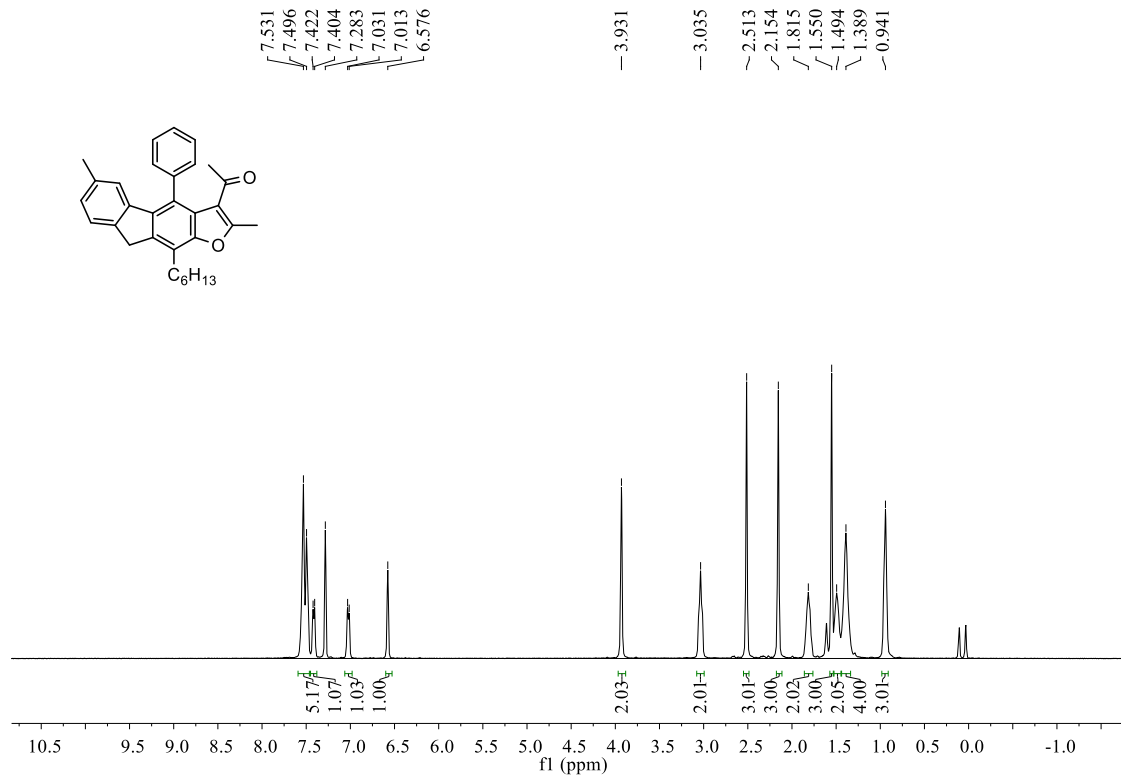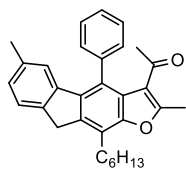

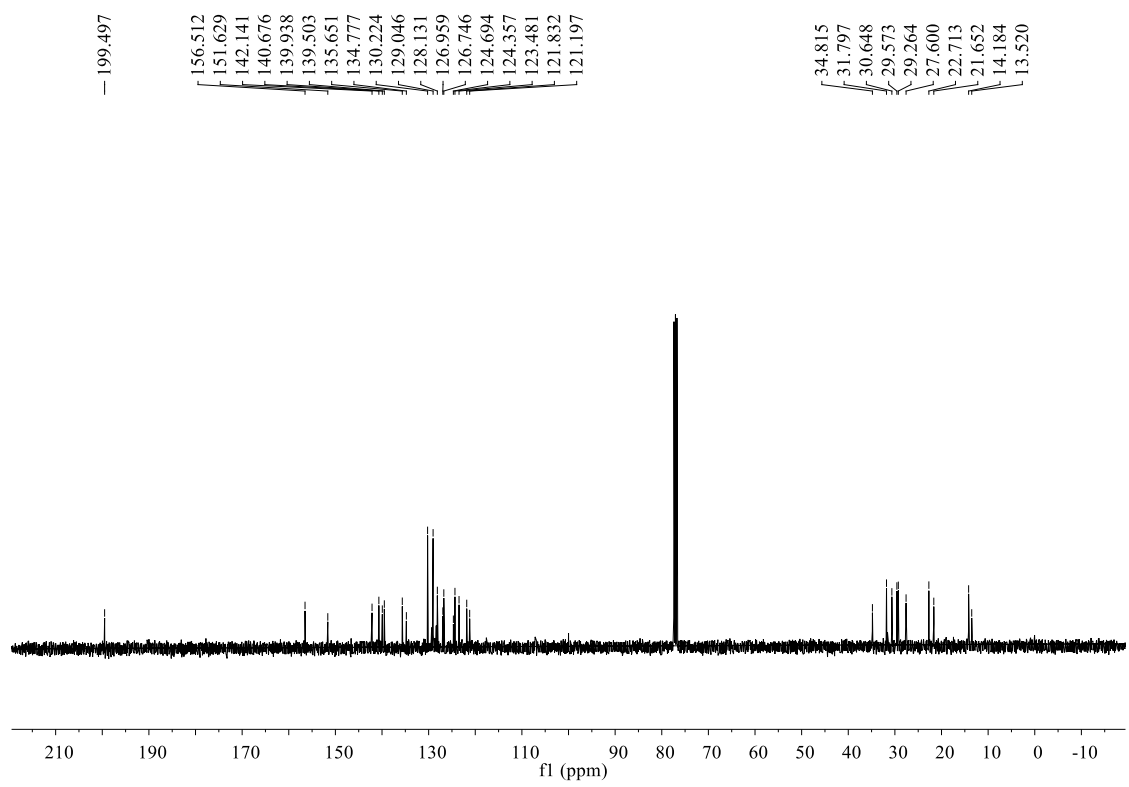

6a

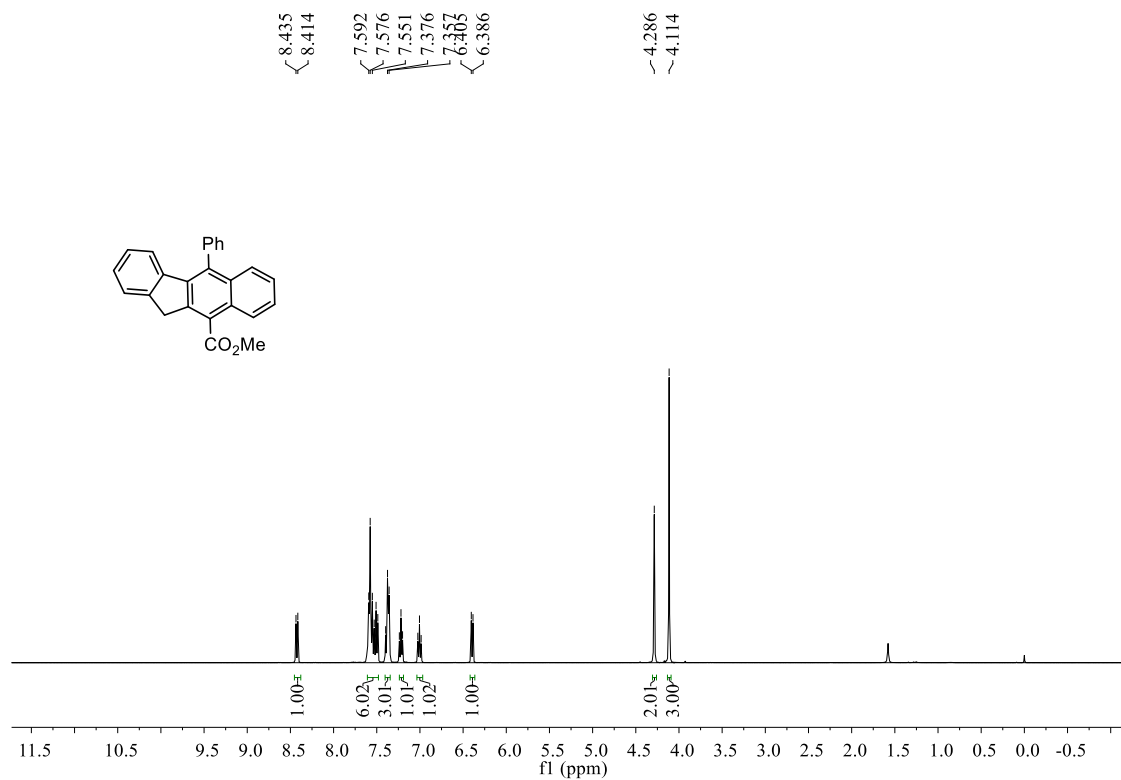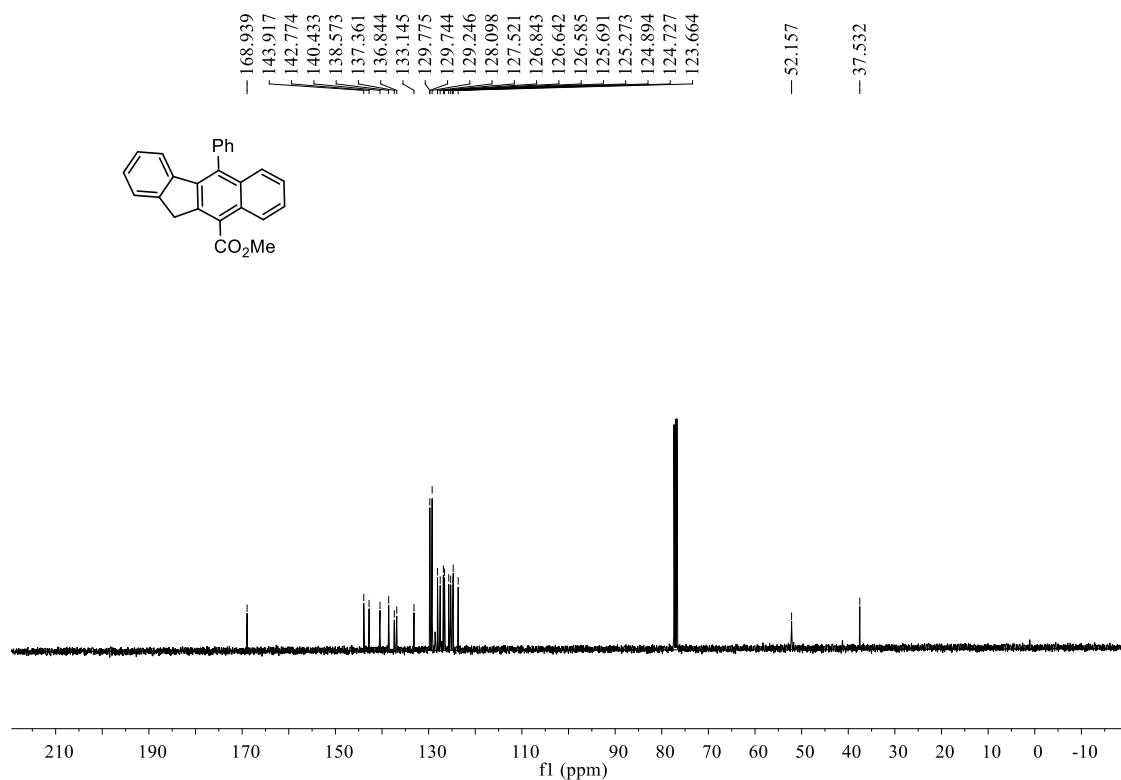

6b

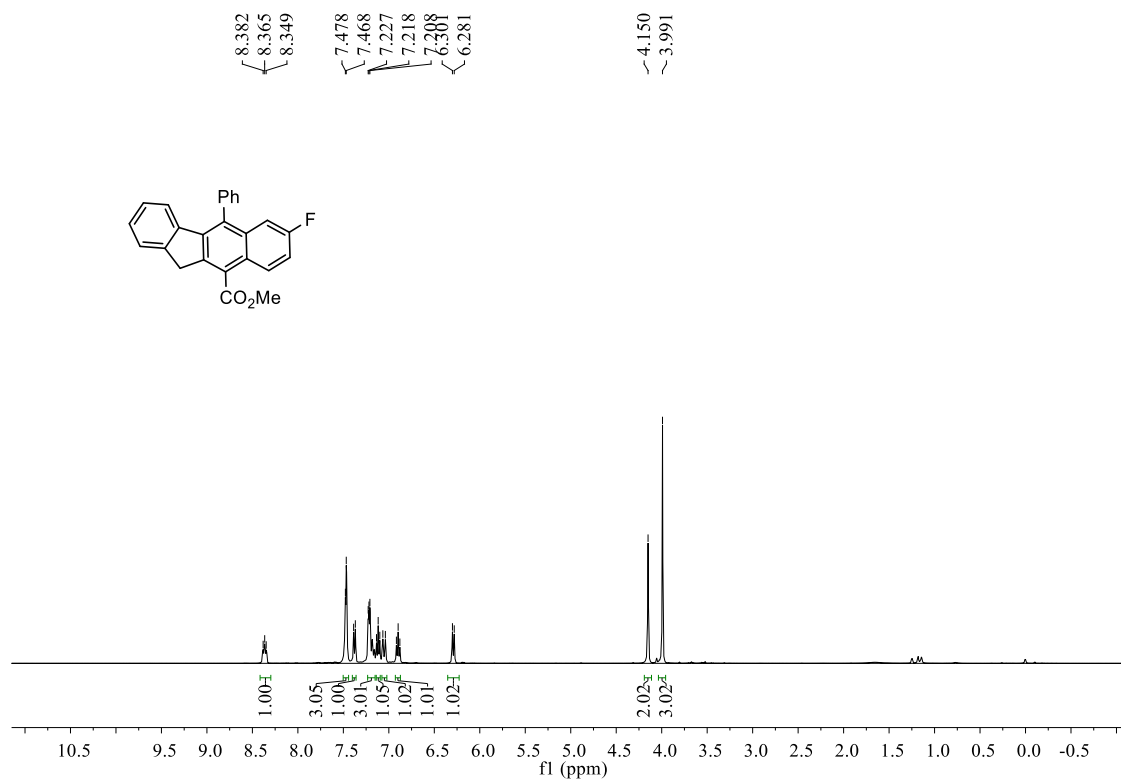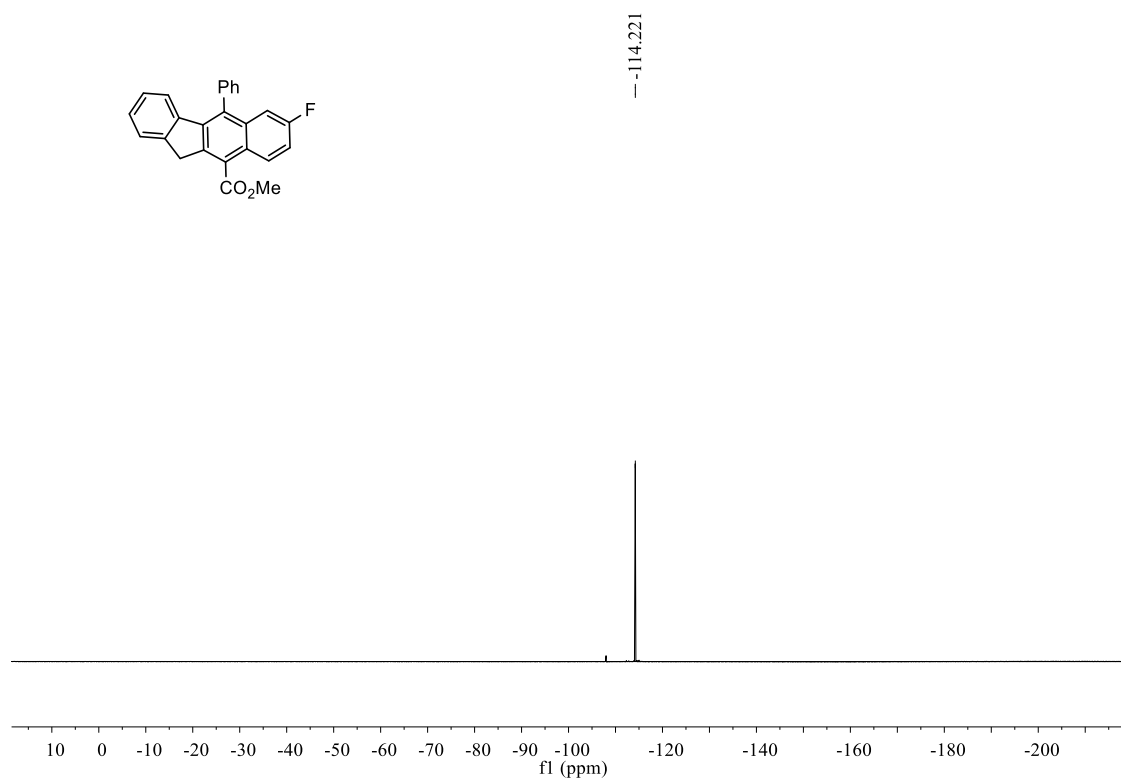

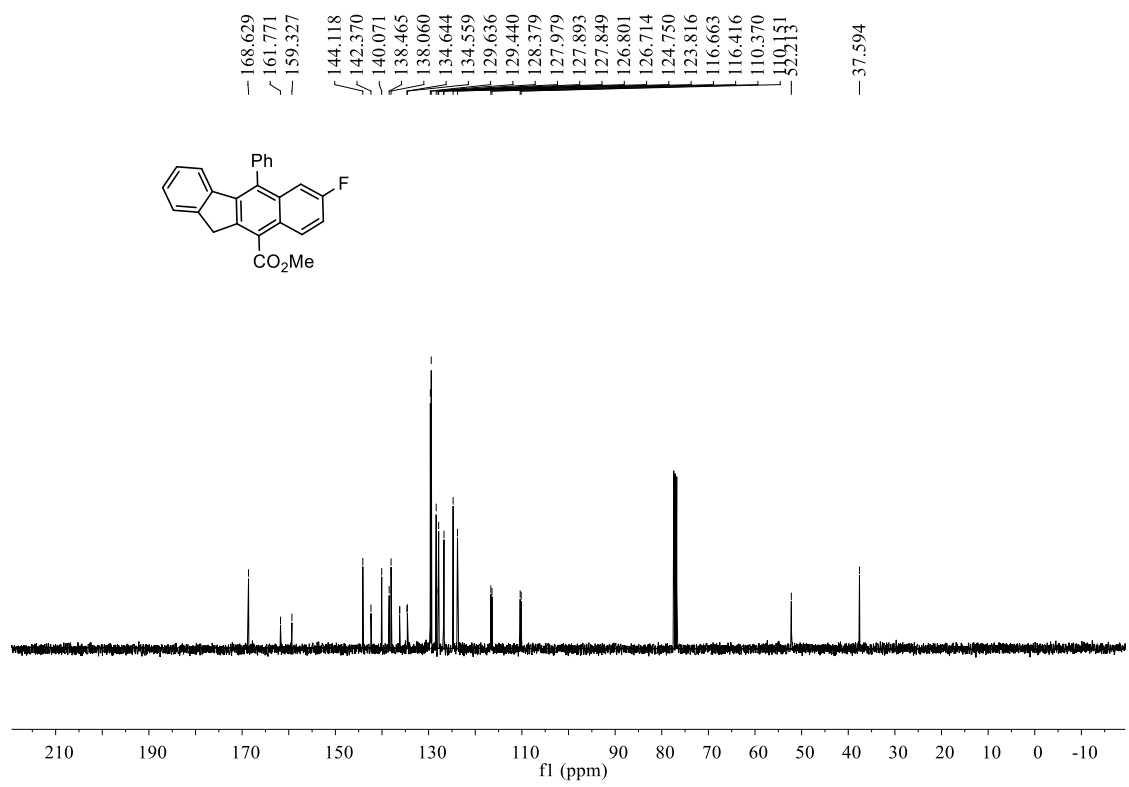

6c

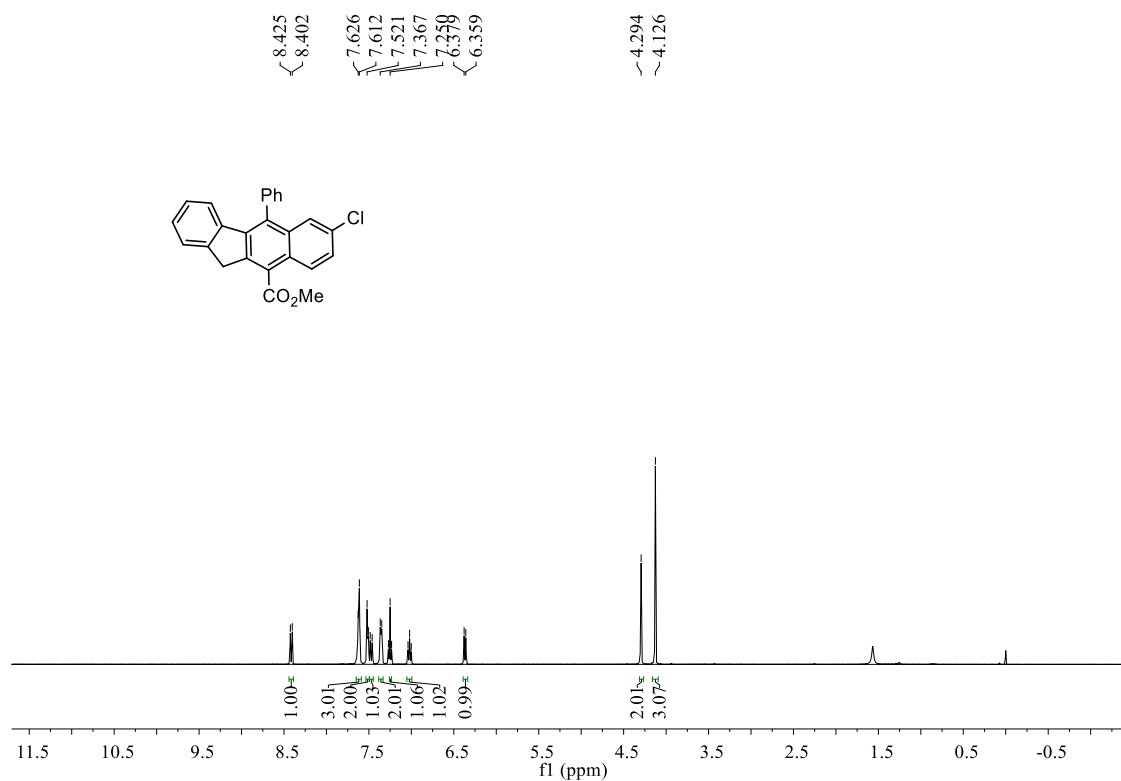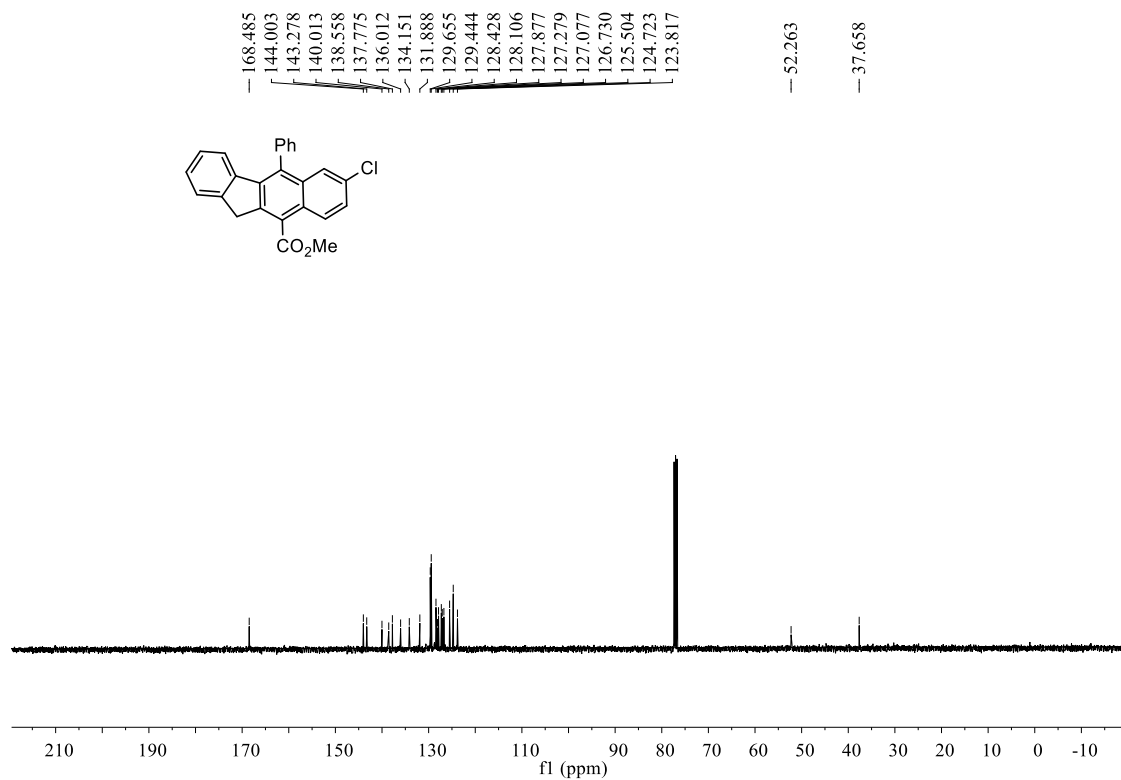



6d

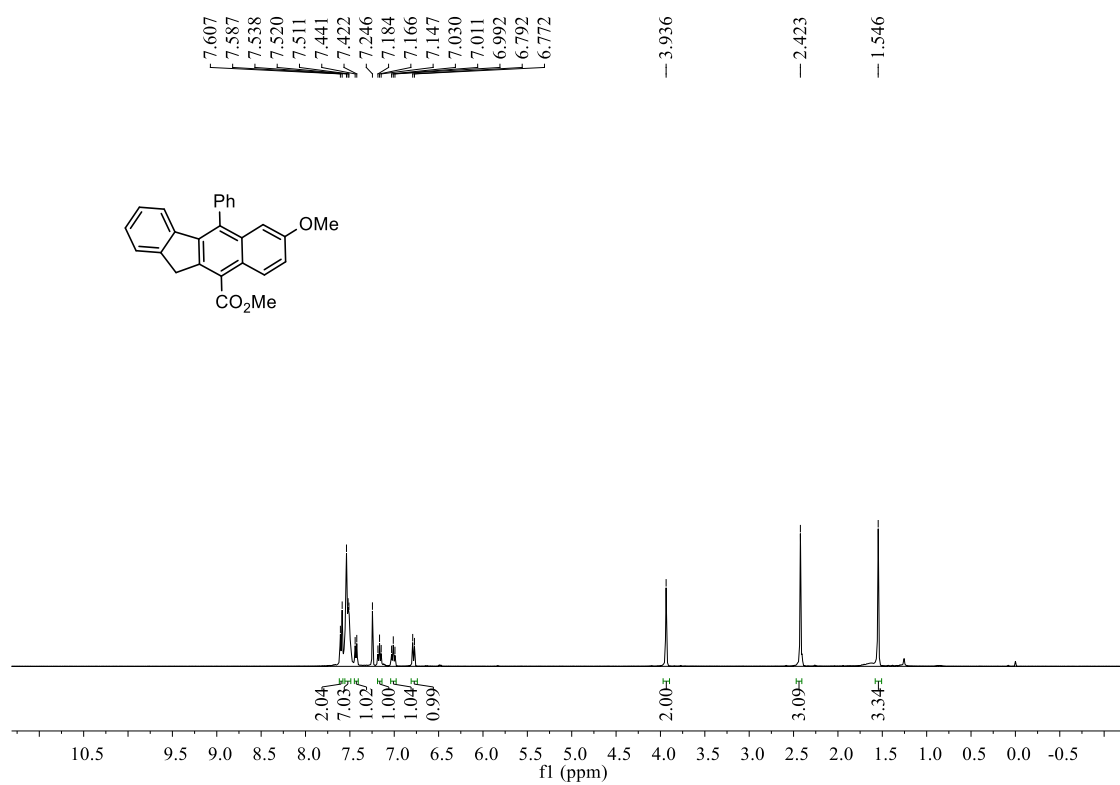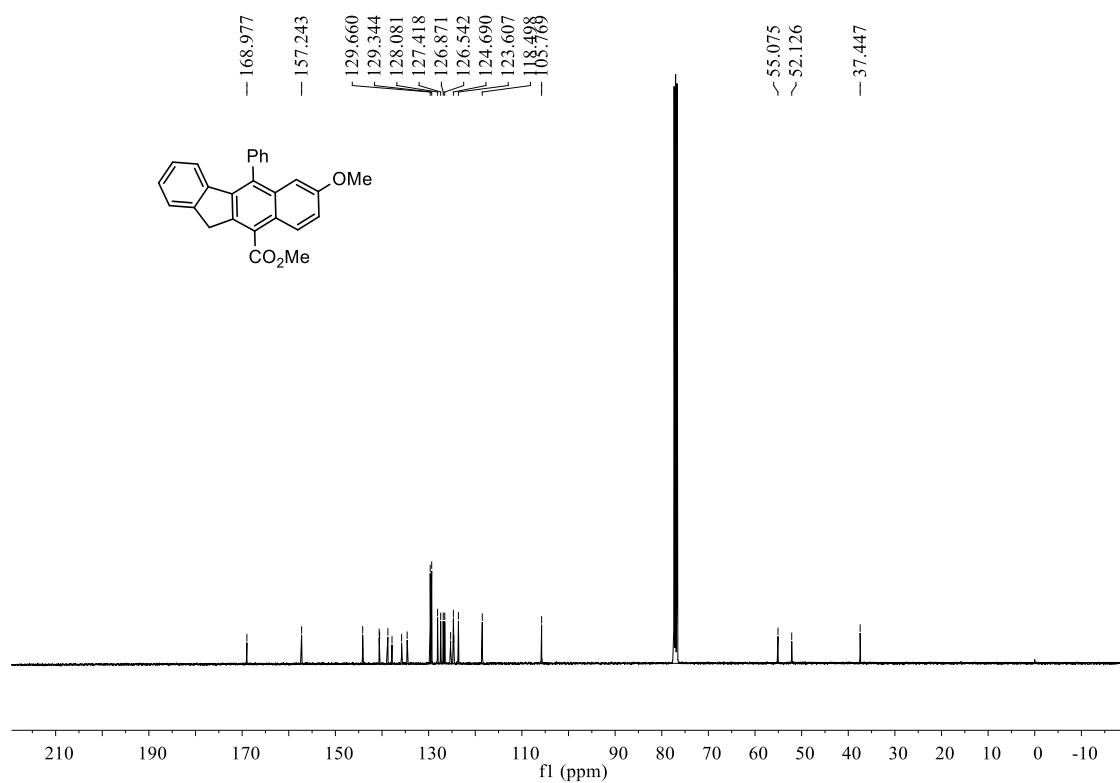

6e

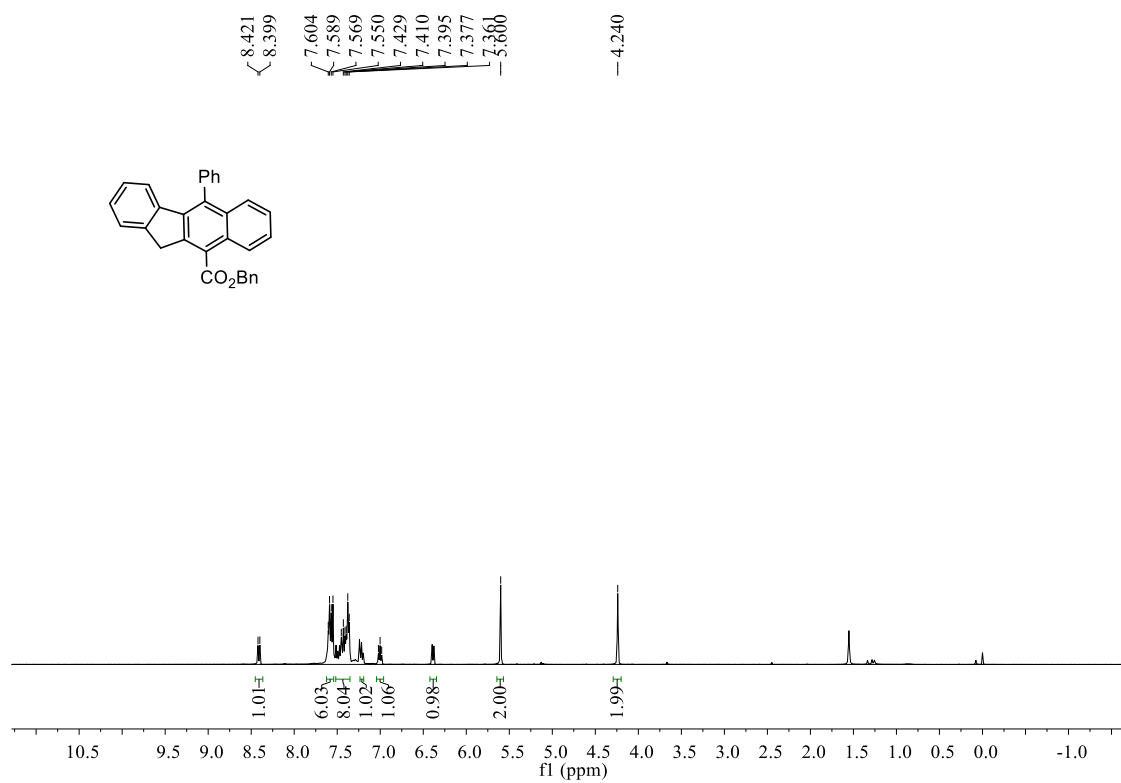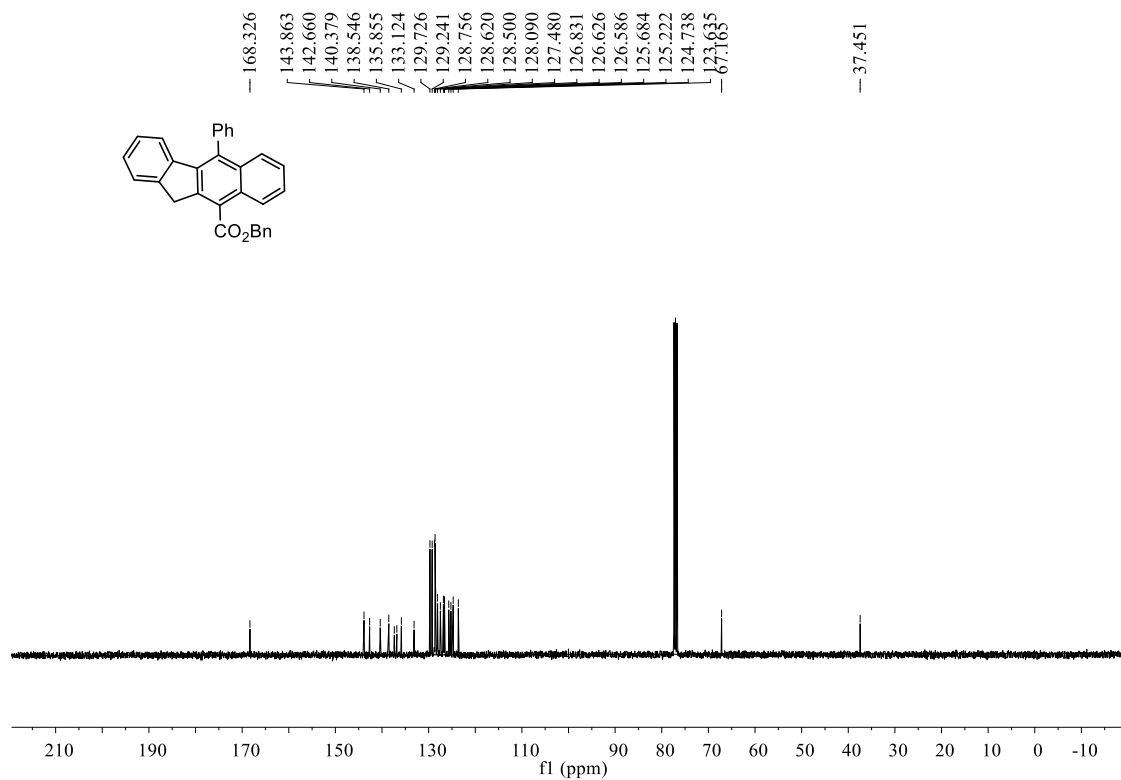

6f

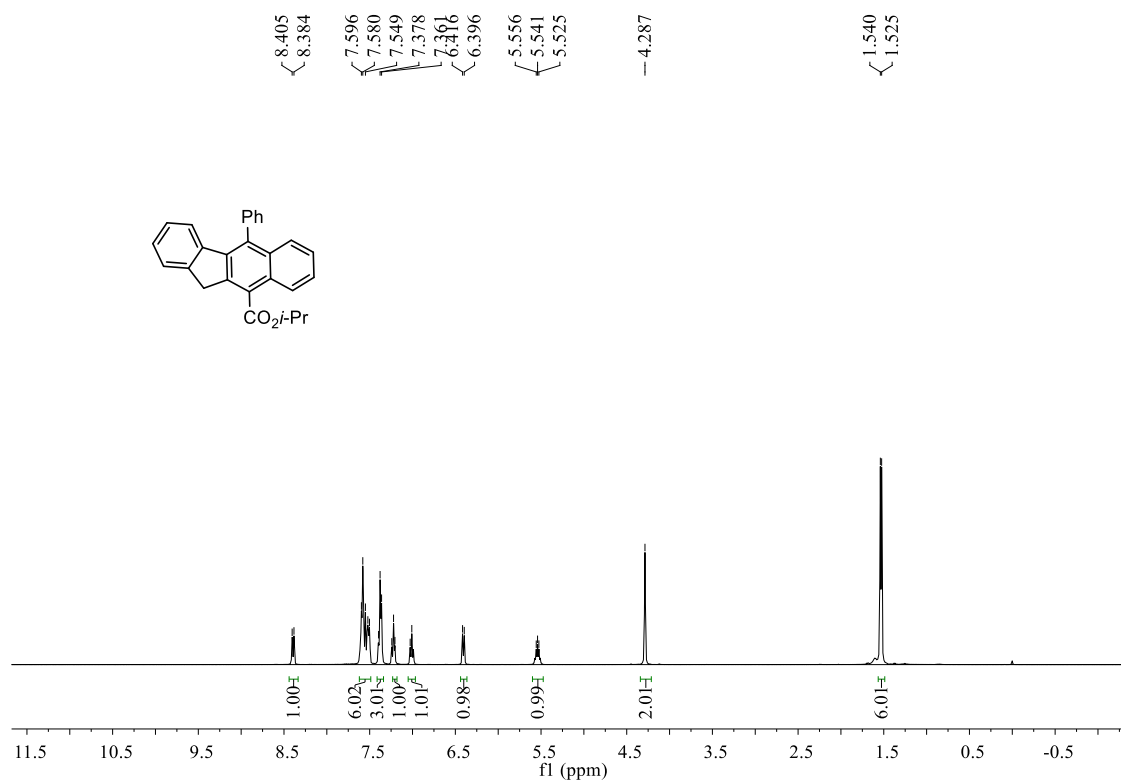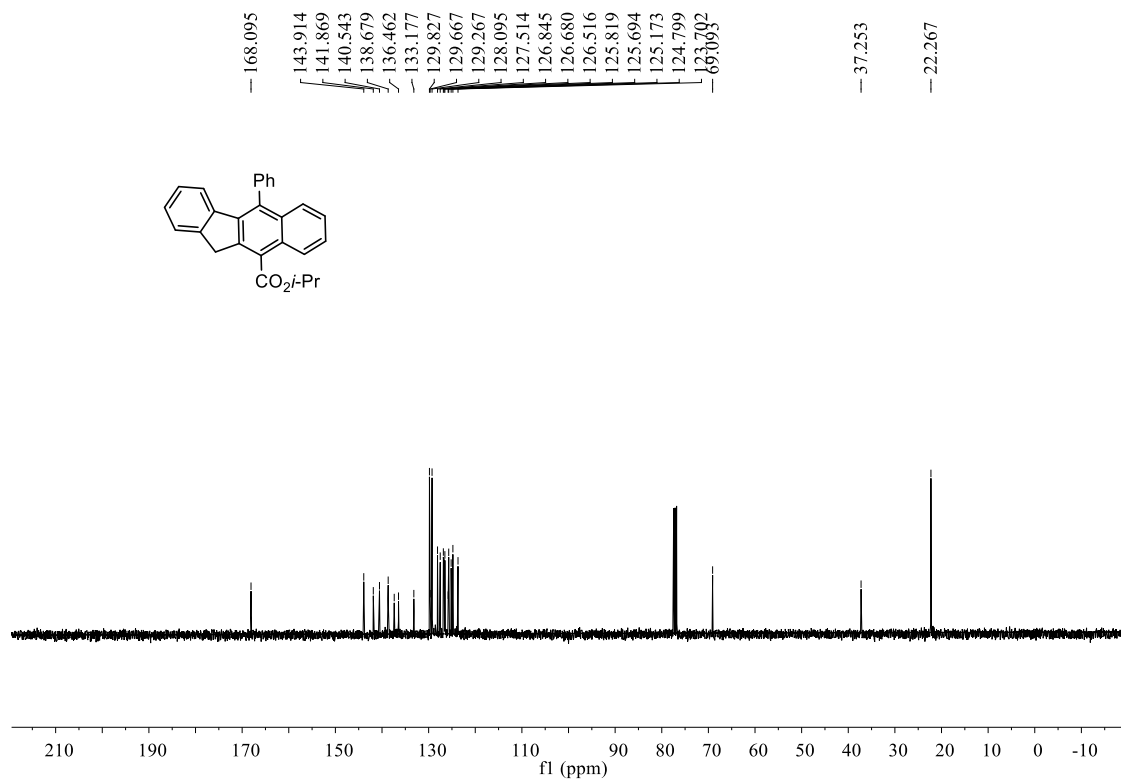

6g

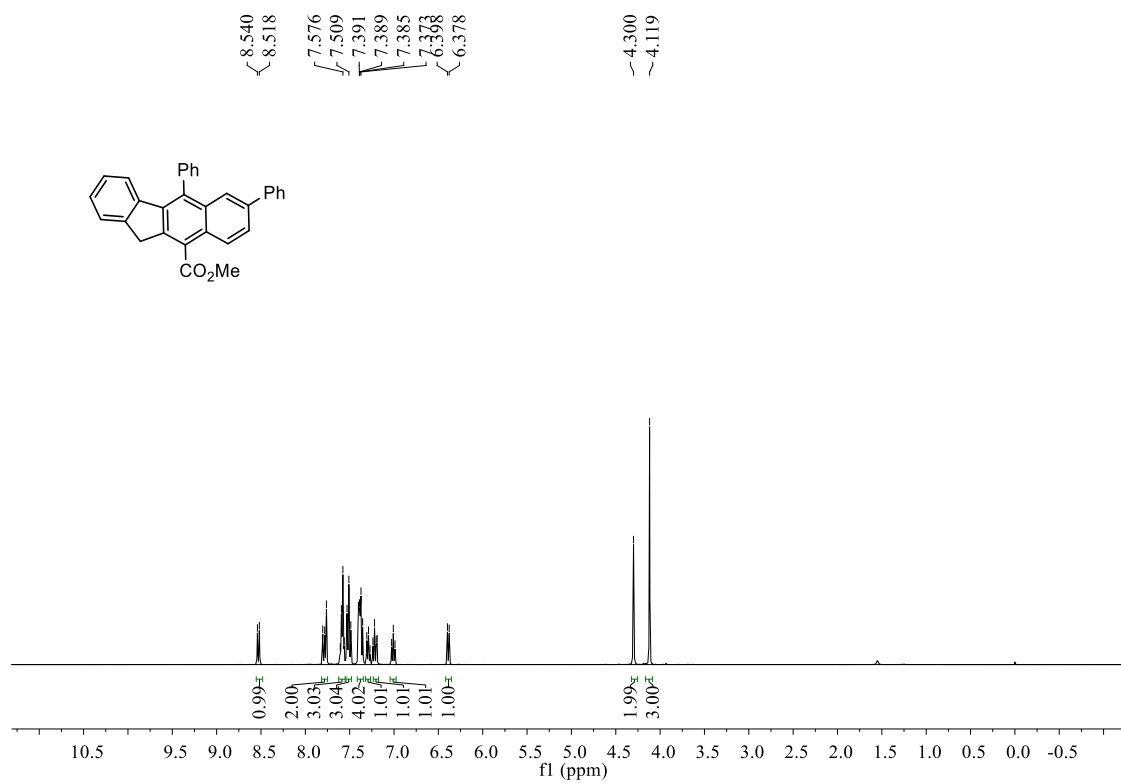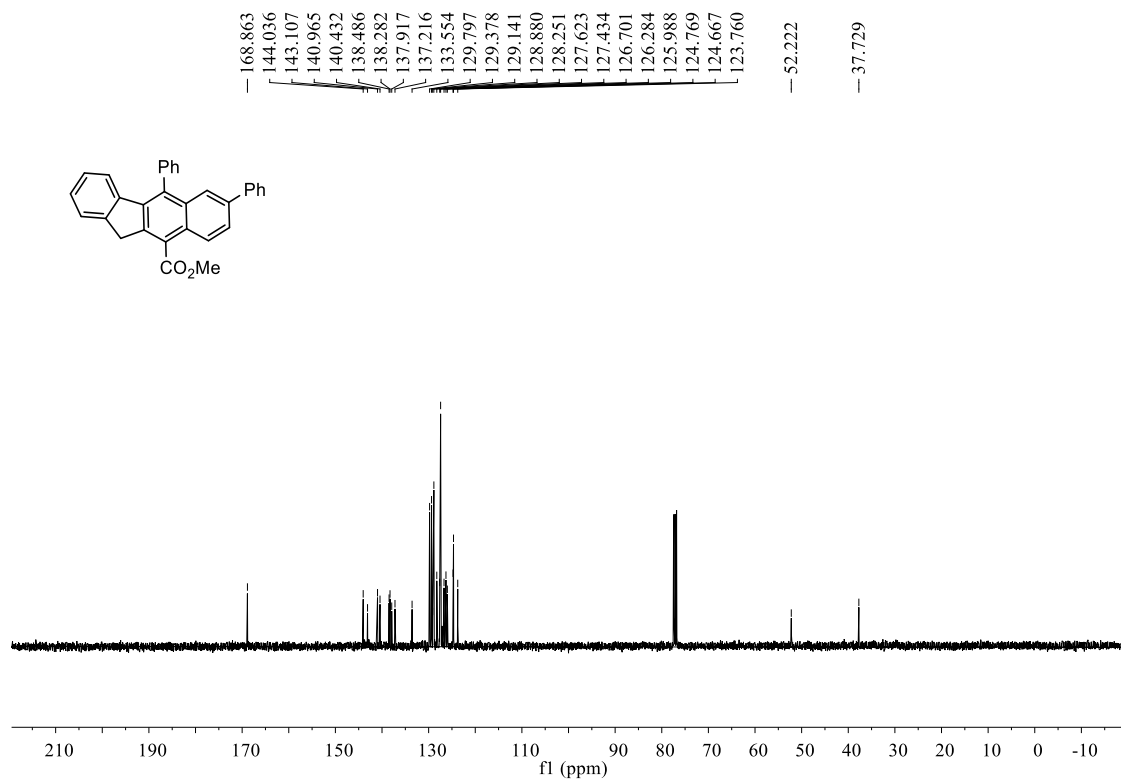

6h

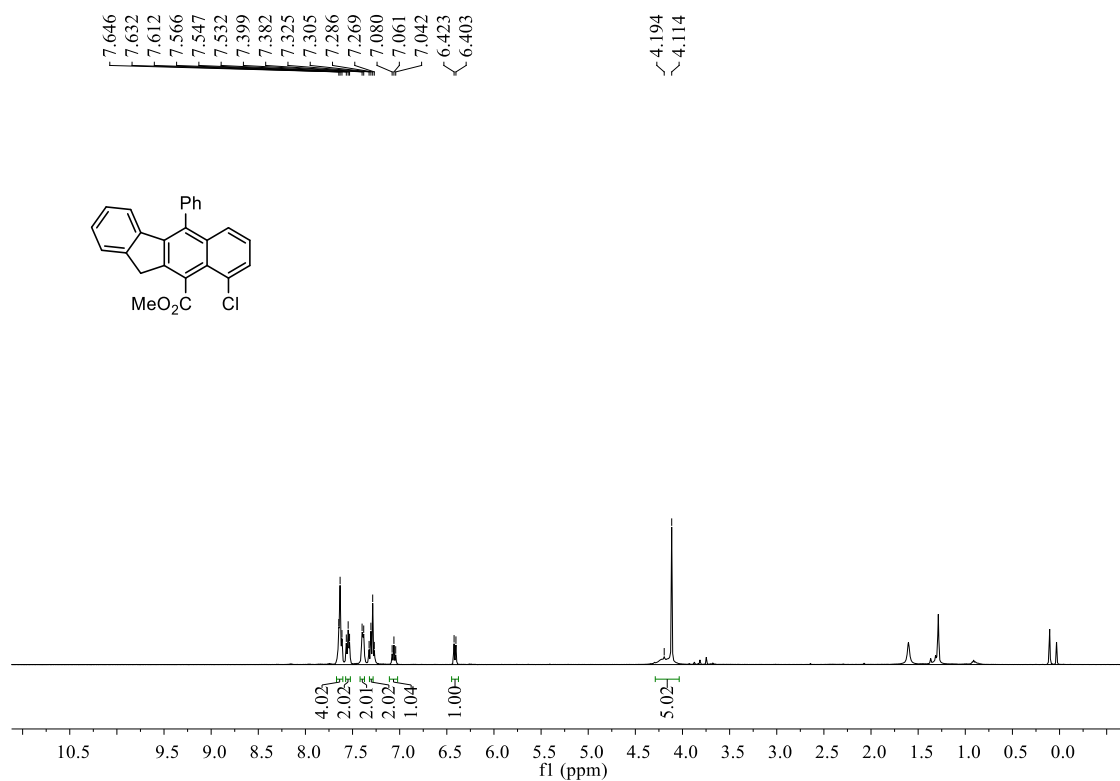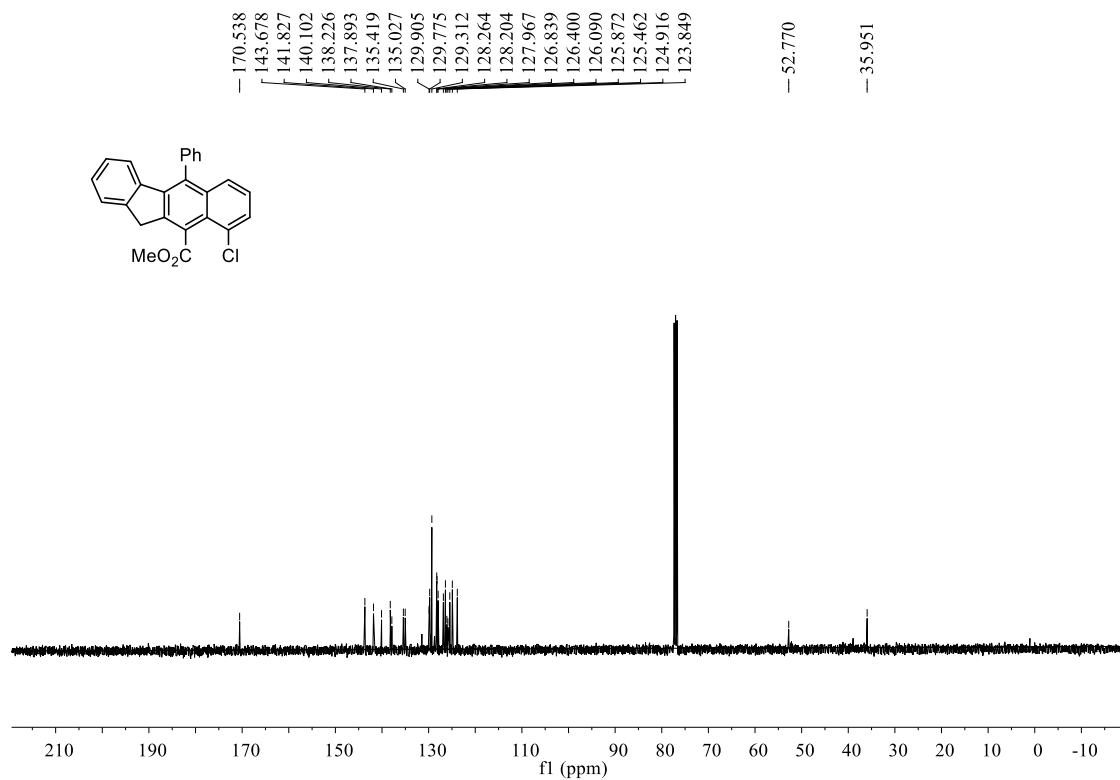

6i (*E* major)

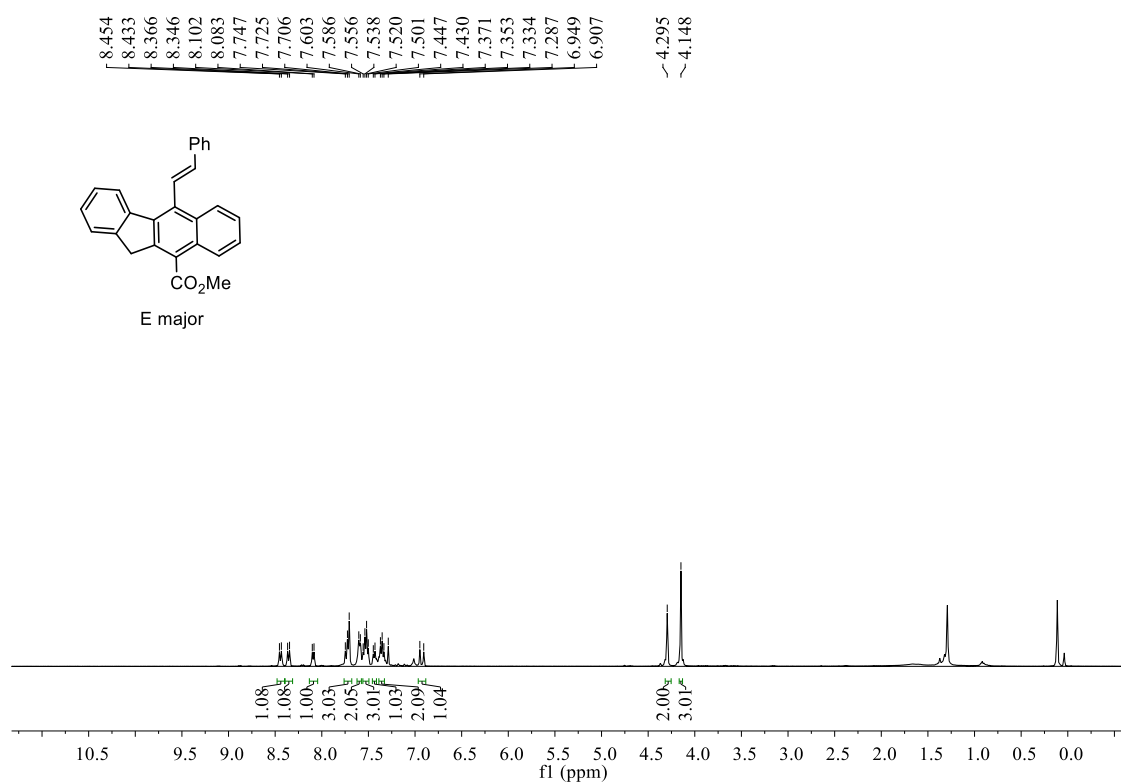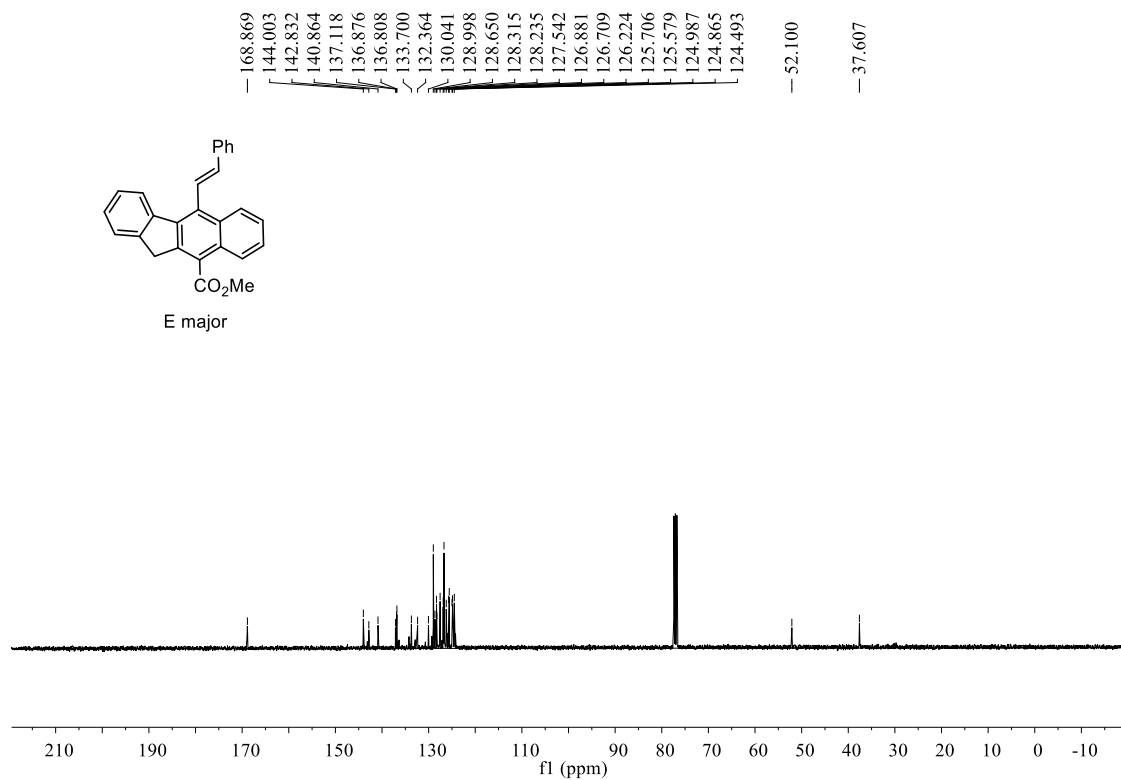

6j

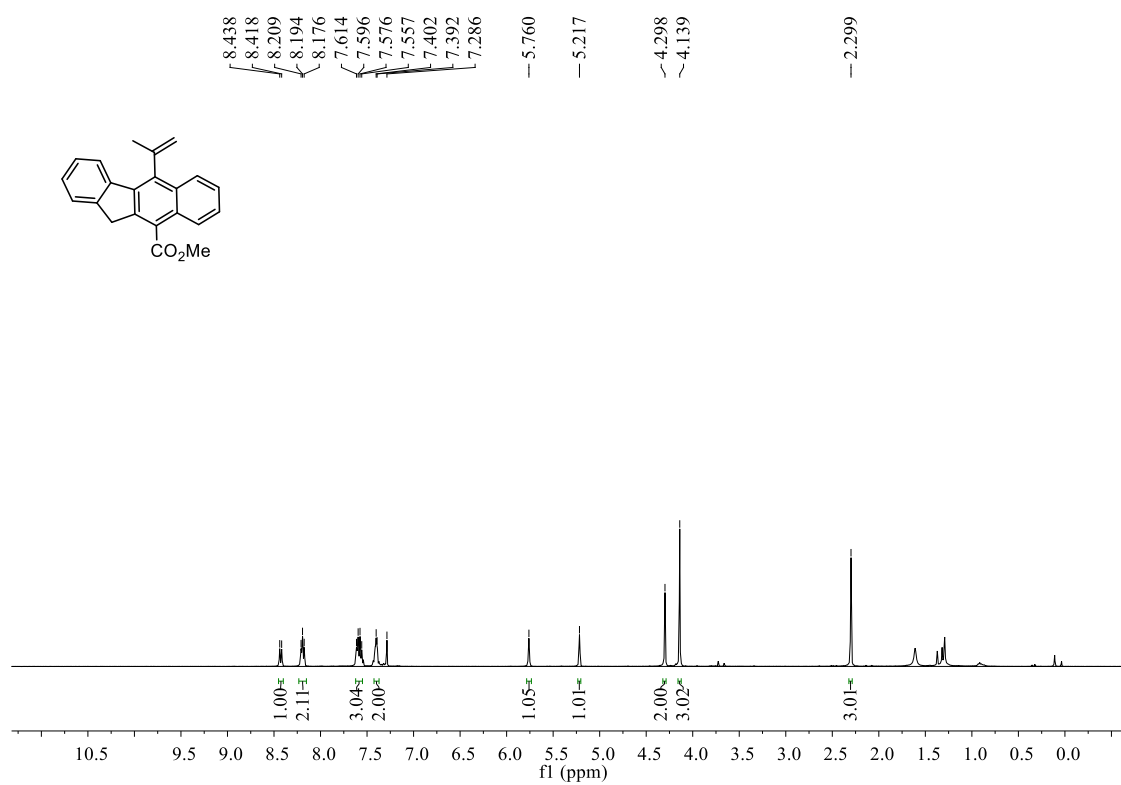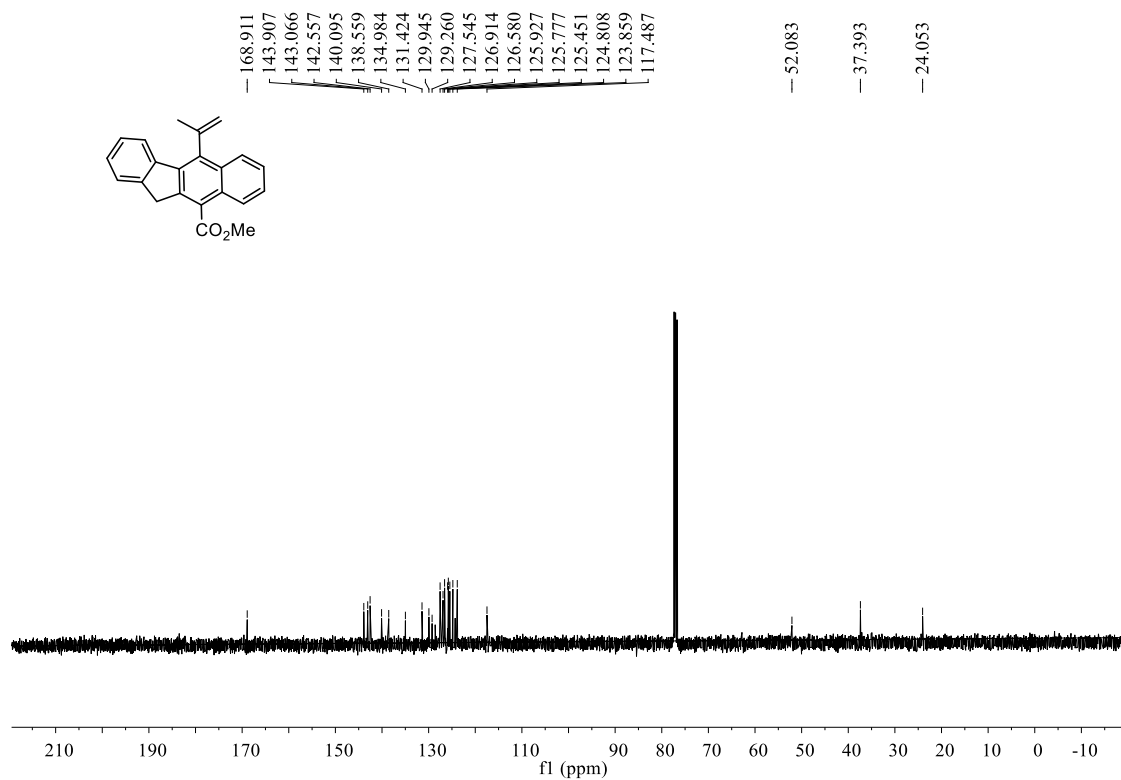

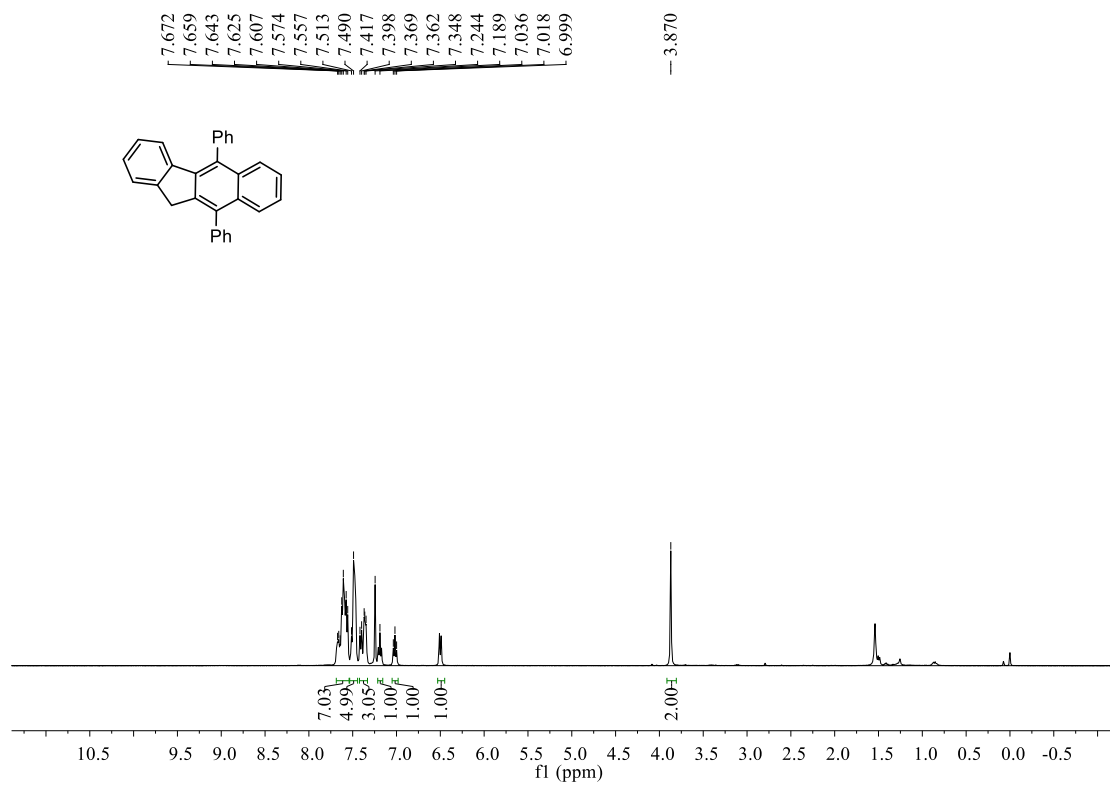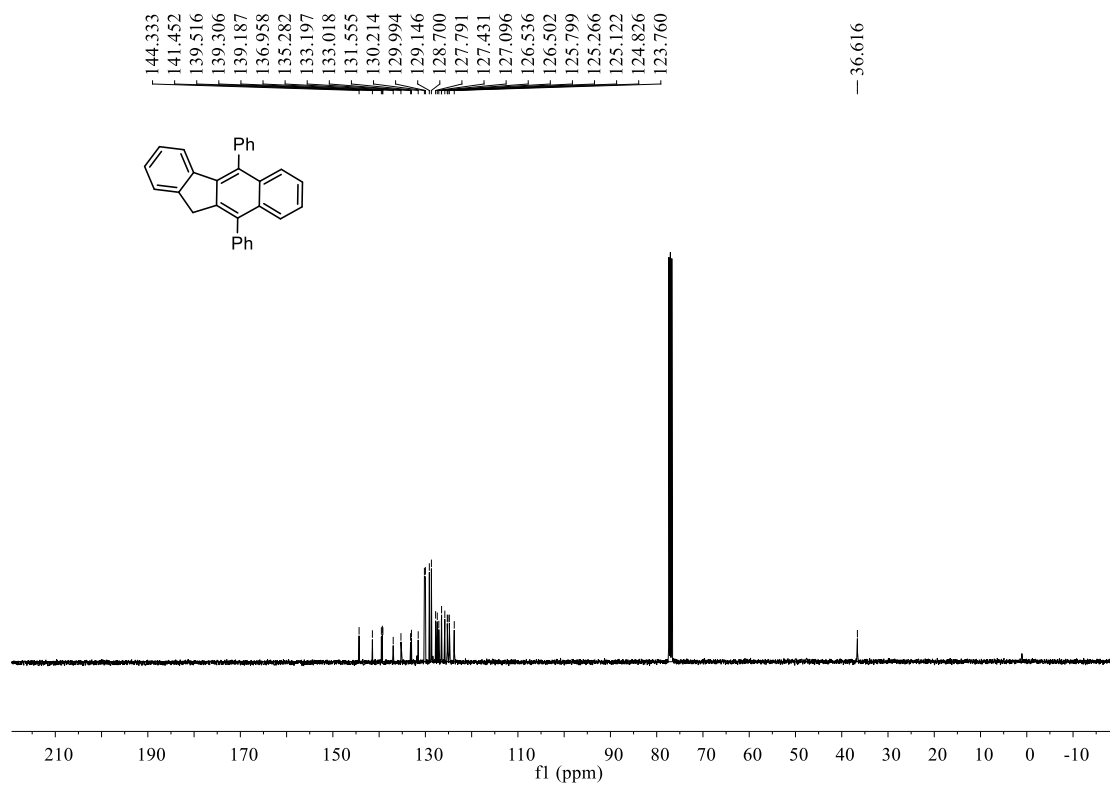

Supplement: c9qo00045c1.pdf [file c9qo00045c1.pdf]
